# Supplementary material for: Binary interpnictogen compounds bearing diaryl bismuth fragments bound to all lighter pnictogens
Source: Royal Society of Chemistry journal article supplement (doi:10.1039/d2dt00472k), 2022-01-01
Supplement: d2dt00472k1.pdf [file d2dt00472k1.pdf]

**Titel...**

# Table of Contents

## 1. Mass spectra

|                                                                                                    |           |
|----------------------------------------------------------------------------------------------------|-----------|
| <b>Figure S1.1:</b> Mass spectrum of $\text{Ph}_2\text{BiNMe}_2$ (1).....                          | <b>6</b>  |
| <b>Figure S1.2:</b> Mass spectrum of $\text{Mes}_2\text{BiNMe}_2$ (2) .....                        | <b>7</b>  |
| <b>Figure S1.3:</b> Mass spectrum of $\text{Mes}_2\text{BiNH}t\text{Bu}$ (3) .....                 | <b>8</b>  |
| <b>Figure S1.4:</b> Mass spectrum of $\text{Ph}_2\text{BiP}t\text{Bu}_2$ (4) .....                 | <b>9</b>  |
| <b>Figure S1.5:</b> Mass spectrum of $\text{Mes}_2\text{BiP}t\text{Bu}_2$ (5).....                 | <b>10</b> |
| <b>Figure S1.6:</b> Mass spectrum of $\text{Ph}_2\text{BiP}t\text{Bu}(\text{SiMe}_3)$ (6).....     | <b>11</b> |
| <b>Figure S1.7:</b> Mass spectrum of $\text{Mes}_2\text{BiP}t\text{Bu}(\text{SiMe}_3)$ (7) .....   | <b>12</b> |
| <b>Figure S1.8:</b> Mass spectrum of $\text{Ph}_2\text{BiAs}t\text{Bu}_2$ (8) .....                | <b>13</b> |
| <b>Figure S1.9:</b> Mass spectrum of $\text{Mes}_2\text{BiAs}t\text{Bu}_2$ (9).....                | <b>14</b> |
| <b>Figure S1.10:</b> Mass spectrum of $\text{Ph}_2\text{BiAs}t\text{Bu}(\text{SiMe}_3)$ (10).....  | <b>15</b> |
| <b>Figure S1.11:</b> Mass spectrum of $\text{Mes}_2\text{BiAs}t\text{Bu}(\text{SiMe}_3)$ (11)..... | <b>16</b> |
| <b>Figure S1.12:</b> Mass spectrum of $\text{Ph}_2\text{BiSbMes}_2$ (12).....                      | <b>17</b> |
| <b>Figure S1.13:</b> Mass spectrum of $\text{Mes}_2\text{BiSbMes}_2$ (13).....                     | <b>18</b> |

## 2. NMR spectra

|                                                                                                                                                      |           |
|------------------------------------------------------------------------------------------------------------------------------------------------------|-----------|
| <b>Figure S2.1.1:</b> $^1\text{H}$ NMR Spectrum of $\text{Ph}_2\text{BiNMe}_2$ ( <b>1</b> ) in $\text{C}_6\text{D}_6$ .....                          | <b>19</b> |
| <b>Figure S2.1.2:</b> $^{13}\text{C}$ NMR Spectrum of $\text{Ph}_2\text{BiNMe}_2$ ( <b>1</b> ) in $\text{C}_6\text{D}_6$ .....                       | <b>20</b> |
| <b>Figure S2.2.1:</b> $^1\text{H}$ NMR Spectrum of $\text{Mes}_2\text{BiNMe}_2$ ( <b>2</b> ) in $\text{C}_6\text{D}_6$ .....                         | <b>21</b> |
| <b>Figure S2.2.2:</b> $^{13}\text{C}$ NMR Spectrum of $\text{Mes}_2\text{BiNMe}_2$ ( <b>2</b> ) in $\text{C}_6\text{D}_6$ .....                      | <b>22</b> |
| <b>Figure S2.3.1:</b> $^1\text{H}$ NMR Spectrum of $\text{Mes}_2\text{BiNH}t\text{Bu}$ ( <b>3</b> ) in $\text{C}_6\text{D}_6$ .....                  | <b>23</b> |
| <b>Figure S2.3.2:</b> $^{13}\text{C}$ NMR Spectrum of $\text{Mes}_2\text{BiNH}t\text{Bu}$ ( <b>3</b> ) in $\text{C}_6\text{D}_6$ .....               | <b>24</b> |
| <b>Figure S2.4.1:</b> $^1\text{H}$ NMR Spectrum of $\text{Ph}_2\text{BiP}t\text{Bu}_2$ ( <b>4</b> ) in $\text{C}_6\text{D}_6$ .....                  | <b>25</b> |
| <b>Figure S2.4.2:</b> $^{13}\text{C}$ NMR Spectrum of $\text{Ph}_2\text{BiP}t\text{Bu}_2$ ( <b>4</b> ) in $\text{C}_6\text{D}_6$ .....               | <b>26</b> |
| <b>Figure S2.4.3:</b> $^{31}\text{P}$ NMR Spectrum of $\text{Ph}_2\text{BiP}t\text{Bu}_2$ ( <b>4</b> ) in $\text{C}_6\text{D}_6$ .....               | <b>27</b> |
| <b>Figure S2.5.1:</b> $^1\text{H}$ NMR Spectrum of $\text{Mes}_2\text{BiP}t\text{Bu}_2$ ( <b>5</b> ) in $\text{C}_6\text{D}_6$ .....                 | <b>28</b> |
| <b>Figure S2.5.2:</b> $^{13}\text{C}$ NMR Spectrum of $\text{Mes}_2\text{BiP}t\text{Bu}_2$ ( <b>5</b> ) in $\text{C}_6\text{D}_6$ .....              | <b>29</b> |
| <b>Figure S2.5.3:</b> $^{31}\text{P}$ NMR Spectrum of $\text{Mes}_2\text{BiP}t\text{Bu}_2$ ( <b>5</b> ) in $\text{C}_6\text{D}_6$ .....              | <b>30</b> |
| <b>Figure S2.6.1:</b> $^1\text{H}$ NMR Spectrum of $\text{Ph}_2\text{BiP}t\text{Bu}(\text{SiMe}_3)$ ( <b>6</b> ) in $\text{C}_6\text{D}_6$ .....     | <b>31</b> |
| <b>Figure S2.6.2:</b> $^{13}\text{C}$ NMR Spectrum of $\text{Ph}_2\text{BiP}t\text{Bu}(\text{SiMe}_3)$ ( <b>6</b> ) in $\text{C}_6\text{D}_6$ .....  | <b>32</b> |
| <b>Figure S2.6.3:</b> $^{31}\text{P}$ NMR Spectrum of $\text{Ph}_2\text{BiP}t\text{Bu}(\text{SiMe}_3)$ ( <b>6</b> ) in $\text{C}_6\text{D}_6$ .....  | <b>33</b> |
| <b>Figure S2.6.4:</b> $^{29}\text{Si}$ NMR Spectrum of $\text{Ph}_2\text{BiP}t\text{Bu}(\text{SiMe}_3)$ ( <b>6</b> ) in $\text{C}_6\text{D}_6$ ..... | <b>34</b> |

|                                                                                                                                                          |           |
|----------------------------------------------------------------------------------------------------------------------------------------------------------|-----------|
| <b>Figure S2.7.1:</b> $^1\text{H}$ NMR Spectrum of $\text{Mes}_2\text{BiP}t\text{Bu}(\text{SiMe}_3)$ ( <b>7</b> ) in $\text{C}_6\text{D}_6$ .....        | <b>35</b> |
| <b>Figure S2.7.2:</b> $^{13}\text{C}$ NMR Spectrum of $\text{Mes}_2\text{BiP}t\text{Bu}(\text{SiMe}_3)$ ( <b>7</b> ) in $\text{C}_6\text{D}_6$ .....     | <b>36</b> |
| <b>Figure S2.7.3:</b> $^{31}\text{P}$ NMR Spectrum of $\text{Mes}_2\text{BiP}t\text{Bu}(\text{SiMe}_3)$ ( <b>7</b> ) in $\text{C}_6\text{D}_6$ .....     | <b>37</b> |
| <b>Figure S2.7.4:</b> $^{29}\text{Si}$ NMR Spectrum of $\text{Mes}_2\text{BiP}t\text{Bu}(\text{SiMe}_3)$ ( <b>7</b> ) in $\text{C}_6\text{D}_6$ .....    | <b>38</b> |
| <b>Figure S2.8.1:</b> $^1\text{H}$ NMR Spectrum of $\text{Ph}_2\text{BiAs}t\text{Bu}_2$ ( <b>8</b> ) in $\text{C}_6\text{D}_6$ .....                     | <b>39</b> |
| <b>Figure S2.8.2:</b> $^{13}\text{C}$ NMR Spectrum of $\text{Ph}_2\text{BiAs}t\text{Bu}_2$ ( <b>8</b> ) in $\text{C}_6\text{D}_6$ .....                  | <b>40</b> |
| <b>Figure S2.9.1:</b> $^1\text{H}$ NMR Spectrum of $\text{Mes}_2\text{BiAs}t\text{Bu}_2$ ( <b>9</b> ) in $\text{C}_6\text{D}_6$ .....                    | <b>41</b> |
| <b>Figure S2.9.2:</b> $^{13}\text{C}$ NMR Spectrum of $\text{Mes}_2\text{BiAs}t\text{Bu}_2$ ( <b>9</b> ) in $\text{C}_6\text{D}_6$ .....                 | <b>42</b> |
| <b>Figure S2.10.1:</b> $^1\text{H}$ NMR Spectrum of $\text{Ph}_2\text{BiAs}t\text{Bu}(\text{SiMe}_3)$ ( <b>10</b> ) in $\text{C}_6\text{D}_6$ .....      | <b>43</b> |
| <b>Figure S2.10.2:</b> $^{13}\text{C}$ NMR Spectrum of $\text{Ph}_2\text{BiAs}t\text{Bu}(\text{SiMe}_3)$ ( <b>10</b> ) in $\text{C}_6\text{D}_6$ .....   | <b>44</b> |
| <b>Figure S2.10.3:</b> $^{29}\text{Si}$ NMR Spectrum of $\text{Ph}_2\text{BiAs}t\text{Bu}(\text{SiMe}_3)$ ( <b>10</b> ) in $\text{C}_6\text{D}_6$ .....  | <b>45</b> |
| <b>Figure S2.11.1:</b> $^1\text{H}$ NMR Spectrum of $\text{Mes}_2\text{BiAs}t\text{Bu}(\text{SiMe}_3)$ ( <b>11</b> ) in $\text{C}_6\text{D}_6$ .....     | <b>46</b> |
| <b>Figure S2.11.2:</b> $^{13}\text{C}$ NMR Spectrum of $\text{Mes}_2\text{BiAs}t\text{Bu}(\text{SiMe}_3)$ ( <b>11</b> ) in $\text{C}_6\text{D}_6$ .....  | <b>47</b> |
| <b>Figure S2.11.3:</b> $^{29}\text{Si}$ NMR Spectrum of $\text{Mes}_2\text{BiAs}t\text{Bu}(\text{SiMe}_3)$ ( <b>11</b> ) in $\text{C}_6\text{D}_6$ ..... | <b>48</b> |
| <b>Figure S2.12.1:</b> $^1\text{H}$ NMR Spectrum of $\text{Ph}_2\text{BiSbMes}_2$ ( <b>12</b> ) in toluene- $d_8$ .....                                  | <b>49</b> |
| <b>Figure S2.12.2:</b> Temperature dependent $^1\text{H}$ NMR Spectra of $\text{Ph}_2\text{BiSbMes}_2$ ( <b>12</b> ) in toluene- $d_8$ .....             | <b>50</b> |

|                                                                                                                                                                                                                                   |           |
|-----------------------------------------------------------------------------------------------------------------------------------------------------------------------------------------------------------------------------------|-----------|
| <b>Figure S2.12.3:</b> $^{13}\text{C}$ NMR Spectrum of $\text{Ph}_2\text{BiSbMes}_2$ ( <b>12</b> ) in toluene- $d_8$ .....                                                                                                        | <b>51</b> |
| <b>Figure S2.13.1:</b> $^1\text{H}$ NMR Spectrum of $\text{Ph}_2\text{BiSbMes}_2$ ( <b>13</b> ) in toluene- $d_8$ .....                                                                                                           | <b>52</b> |
| <b>Figure S2.13.2:</b> Temperature dependent $^1\text{H}$ NMR Spectra of $\text{Mes}_2\text{BiSbMes}_2$ ( <b>13</b> ) in toluene- $d_8$ .....                                                                                     | <b>53</b> |
| <b>Figure S2.13.3:</b> $^{13}\text{C}$ NMR Spectrum of $\text{Ph}_2\text{BiSbMes}_2$ ( <b>13</b> ) in toluene- $d_8$ .....                                                                                                        | <b>54</b> |
| <b>3. Calculation of <math>\Delta\text{H}</math>, <math>\Delta\text{S}</math> and <math>\Delta\text{G}(20\text{ }^\circ\text{C})</math> for the equilibria of <b>12</b> and <b>13</b></b>                                         |           |
| <b>Table S1:</b> Equilibrium constants for the dismutation of <b>12</b> and <b>13</b> at different temperatures.....                                                                                                              | <b>55</b> |
| <b>Figure S3.1:</b> <i>van't Hoff</i> plot for the equilibrium of <b>12</b> and $\text{Mes}_4\text{Sb}_2$ and $\text{Ph}_4\text{Bi}_2$ with a fitted linear regression $f(x)$ .....                                               | <b>55</b> |
| <b>Figure S3.1:</b> <i>van't Hoff</i> plot for the equilibrium of <b>12</b> and $\text{Mes}_4\text{Sb}_2$ and $\text{Ph}_4\text{Bi}_2$ with a fitted linear regression $g(x)$ .....                                               | <b>56</b> |
| <b>4. Crystallographic Data</b>                                                                                                                                                                                                   |           |
| <b>Table S2:</b> Crystallographic data of $\text{Ph}_2\text{BiNMe}_2$ ( <b>1</b> ), $\text{Mes}_2\text{BiNMe}_2$ ( <b>2</b> ) and $\text{Mes}_2\text{BiNH}t\text{Bu}$ ( <b>3</b> ).....                                           | <b>57</b> |
| <b>Table S3:</b> Crystallographic data of $\text{Ph}_2\text{BiP}t\text{Bu}_2$ ( <b>4</b> ), $\text{Mes}_2\text{BiP}t\text{Bu}_2$ ( <b>5</b> ) and $\text{Ph}_2\text{BiP}t\text{Bu}(\text{SiMe}_3)$ ( <b>6</b> ).....              | <b>58</b> |
| <b>Table S4:</b> Crystallographic data of $\text{Mes}_2\text{BiP}t\text{Bu}(\text{SiMe}_3)$ ( <b>7</b> ), $\text{Ph}_2\text{BiAs}t\text{Bu}_2$ ( <b>8</b> ) and $\text{Mes}_2\text{BiAs}t\text{Bu}_2$ ( <b>9</b> ).....           | <b>59</b> |
| <b>Table S5:</b> Crystallographic data of $\text{Ph}_2\text{BiAs}t\text{Bu}(\text{SiMe}_3)$ ( <b>10</b> ), $\text{Mes}_2\text{BiAs}t\text{Bu}(\text{SiMe}_3)$ ( <b>11</b> ) and $\text{Mes}_2\text{BiSbMes}_2$ ( <b>12</b> )..... | <b>60</b> |

# 1. Mass spectra

## 1.1 Ph<sub>2</sub>BiNMe<sub>2</sub> (1)

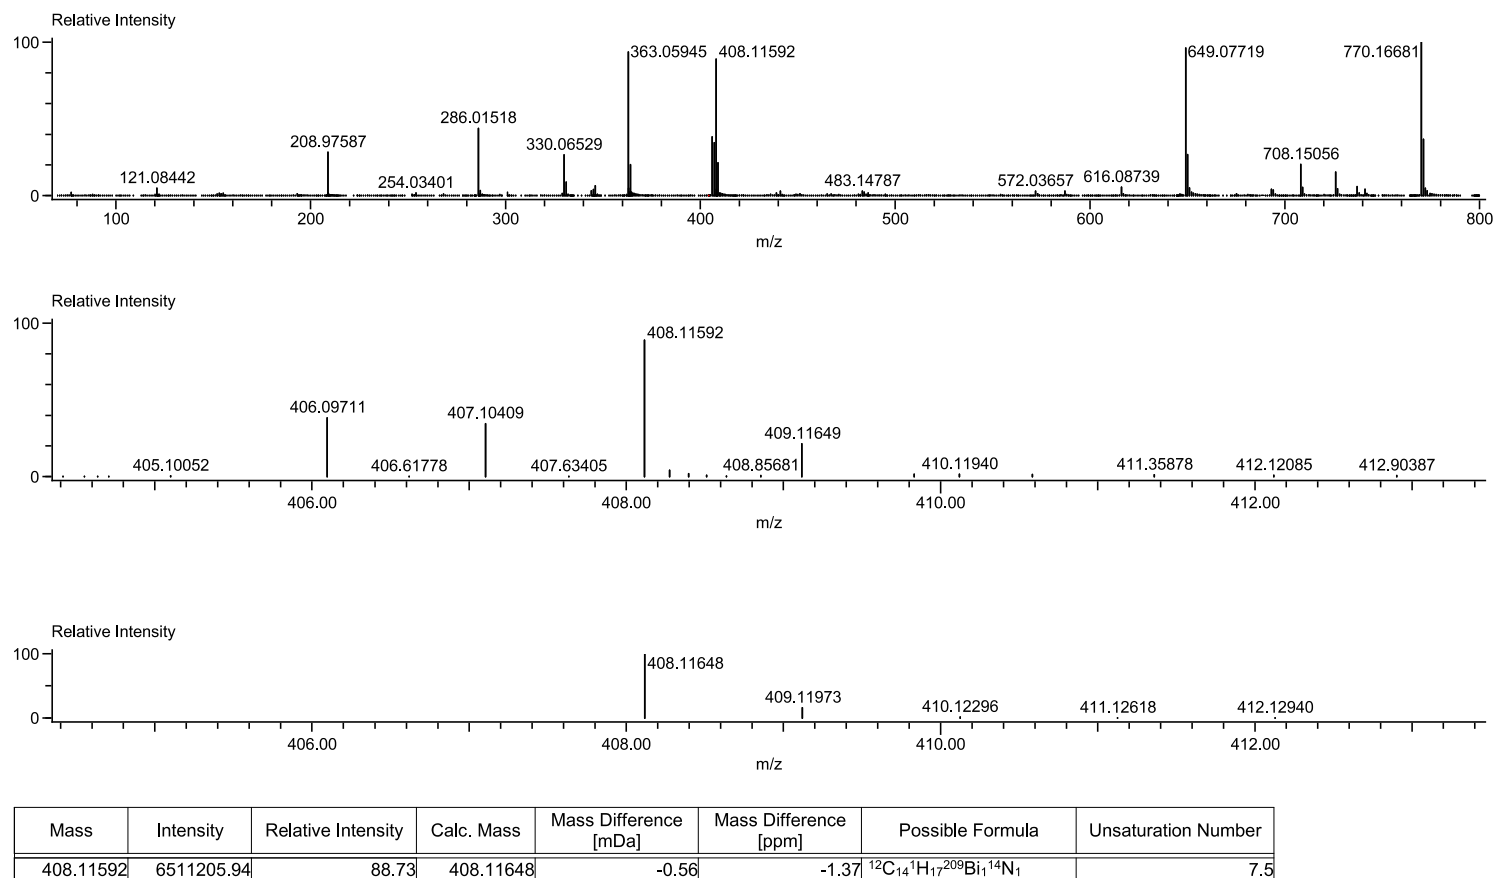

**Figure S1.1.** HR-Cl(+)<sup>+</sup> Mass spectrum of Ph<sub>2</sub>BiNMe<sub>2</sub> (1) as [M + H]<sup>+</sup>. Top: Whole spectrum. Middle: High resolution extract. Bottom: Calculated isotope pattern.

## 1.2 Mes<sub>2</sub>BiNMe<sub>2</sub> (2)

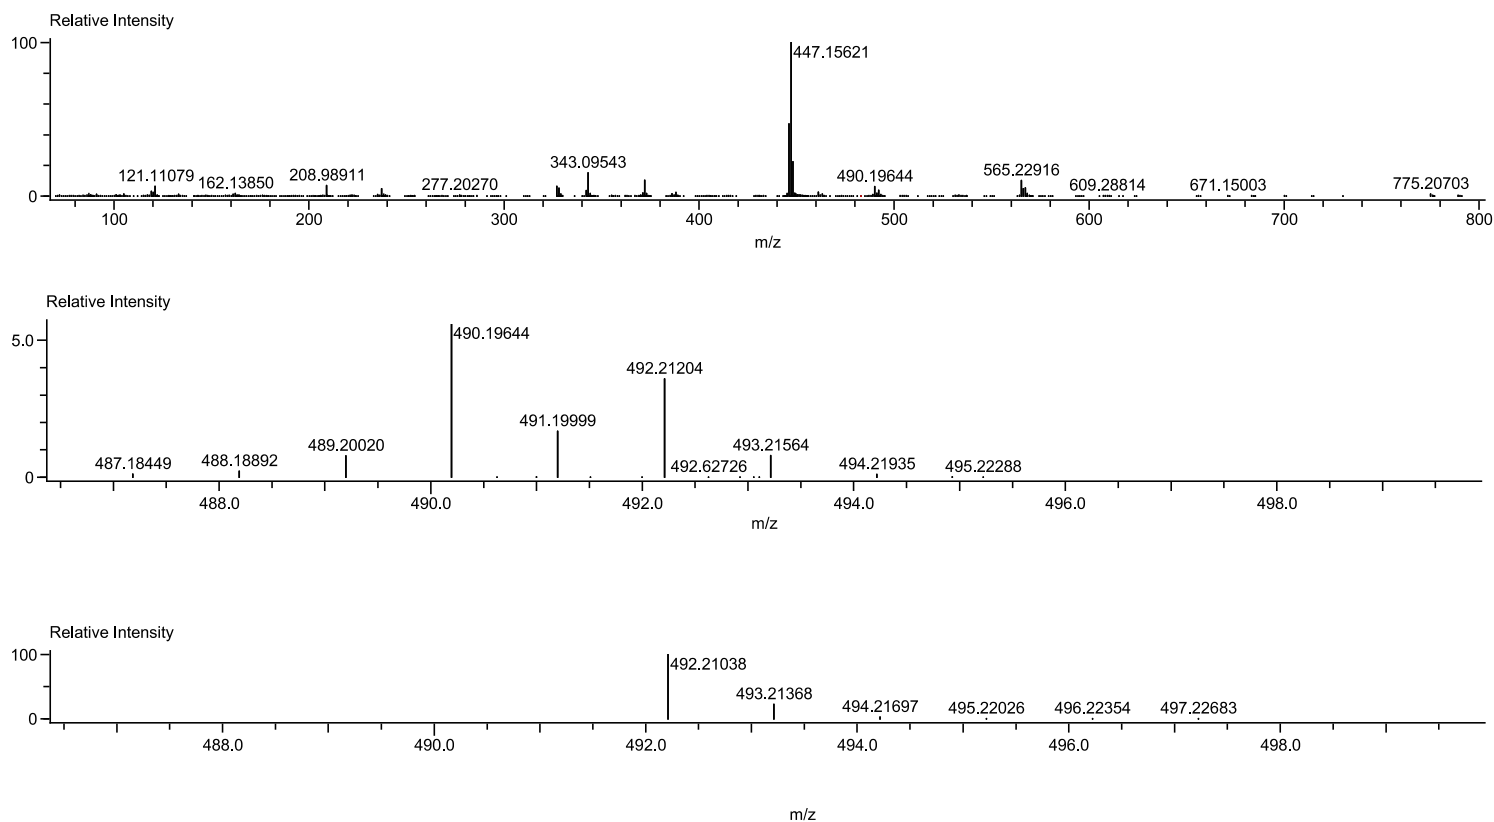

| Mass      | Intensity | Relative Intensity | Calc. Mass | Mass Difference [mDa] | Mass Difference [ppm] | Possible Formula                                                                                                       | Unsaturation Number |
|-----------|-----------|--------------------|------------|-----------------------|-----------------------|------------------------------------------------------------------------------------------------------------------------|---------------------|
| 492.21204 | 165139.39 | 3.59               | 492.21038  | 1.66                  | 3.37                  | <sup>12</sup> C <sub>20</sub> <sup>1</sup> H <sub>29</sub> <sup>209</sup> Bi <sub>1</sub> <sup>14</sup> N <sub>1</sub> | 7.5                 |

**Figure S1.2.** HR-Cl(+)<sup>+</sup> Mass spectrum of Mes<sub>2</sub>BiNMe<sub>2</sub> (2) as [M + H]<sup>+</sup>. Top: Whole spectrum. Middle: High resolution extract. Bottom: Calculated isotope pattern.

### 1.3 Mes<sub>2</sub>BiNHtBu (3)

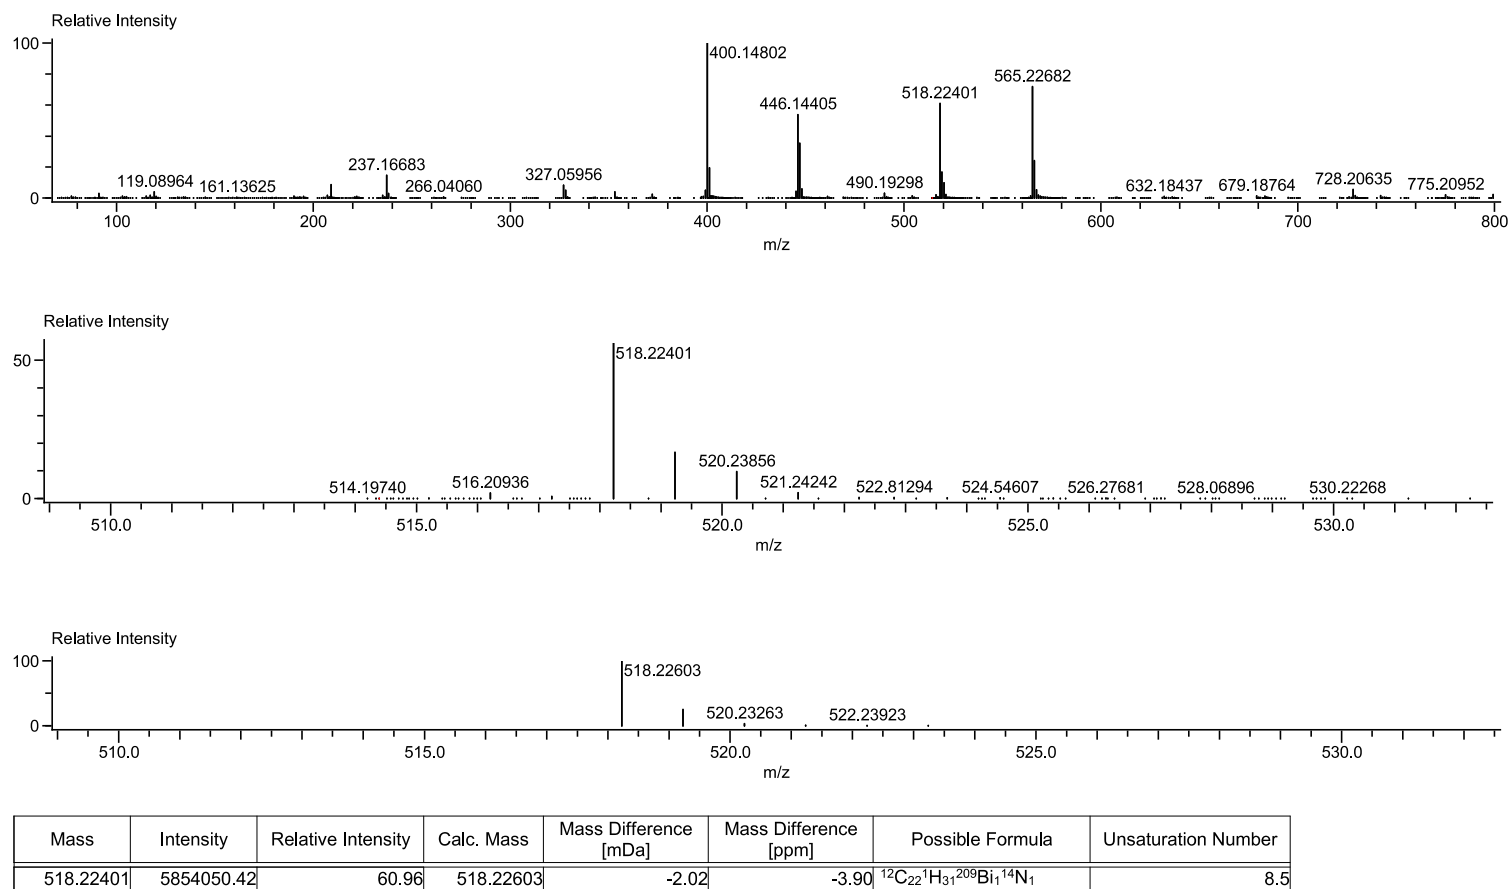

**Figure S1.3.** HR-Cl(+)<sup>+</sup> Mass spectrum of Mes<sub>2</sub>BiNHtBu (3) as [M - H]<sup>+</sup>. Top: Whole spectrum. Middle: High resolution extract.



### 1.4 Ph<sub>2</sub>BiPtBu<sub>2</sub> (4)

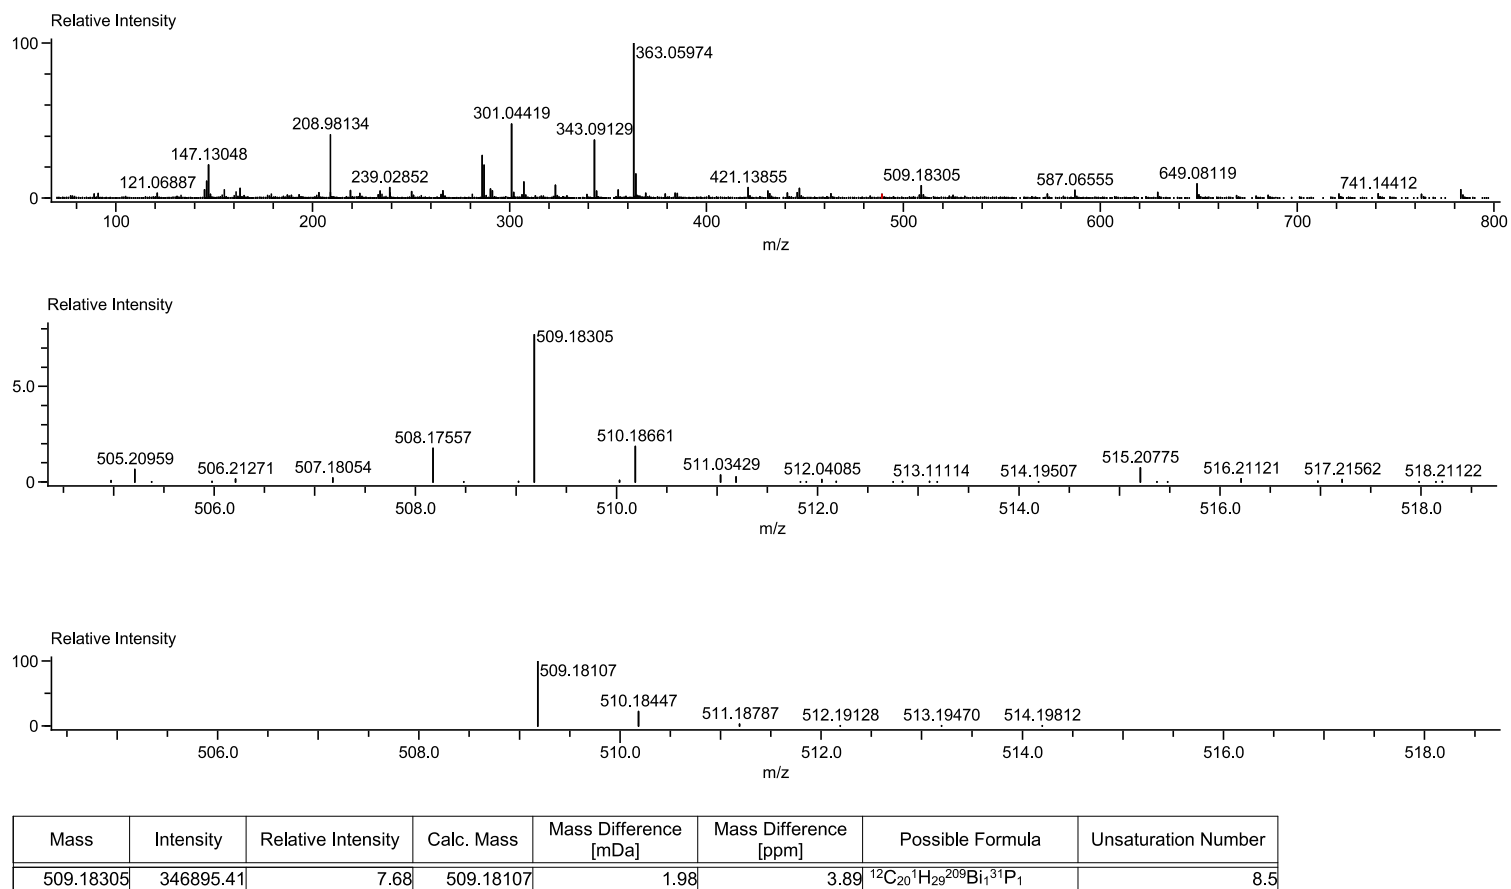

**Figure S1.4.** HR-Cl(+)<sup>+</sup> Mass spectrum of Ph<sub>2</sub>BiPtBu<sub>2</sub> (4) as [M + H]<sup>+</sup>. Top: Whole spectrum. Middle: High resolution extract. Bottom: Calculated isotope pattern.

### 1.5 Mes<sub>2</sub>BiPtBu<sub>2</sub> (5)

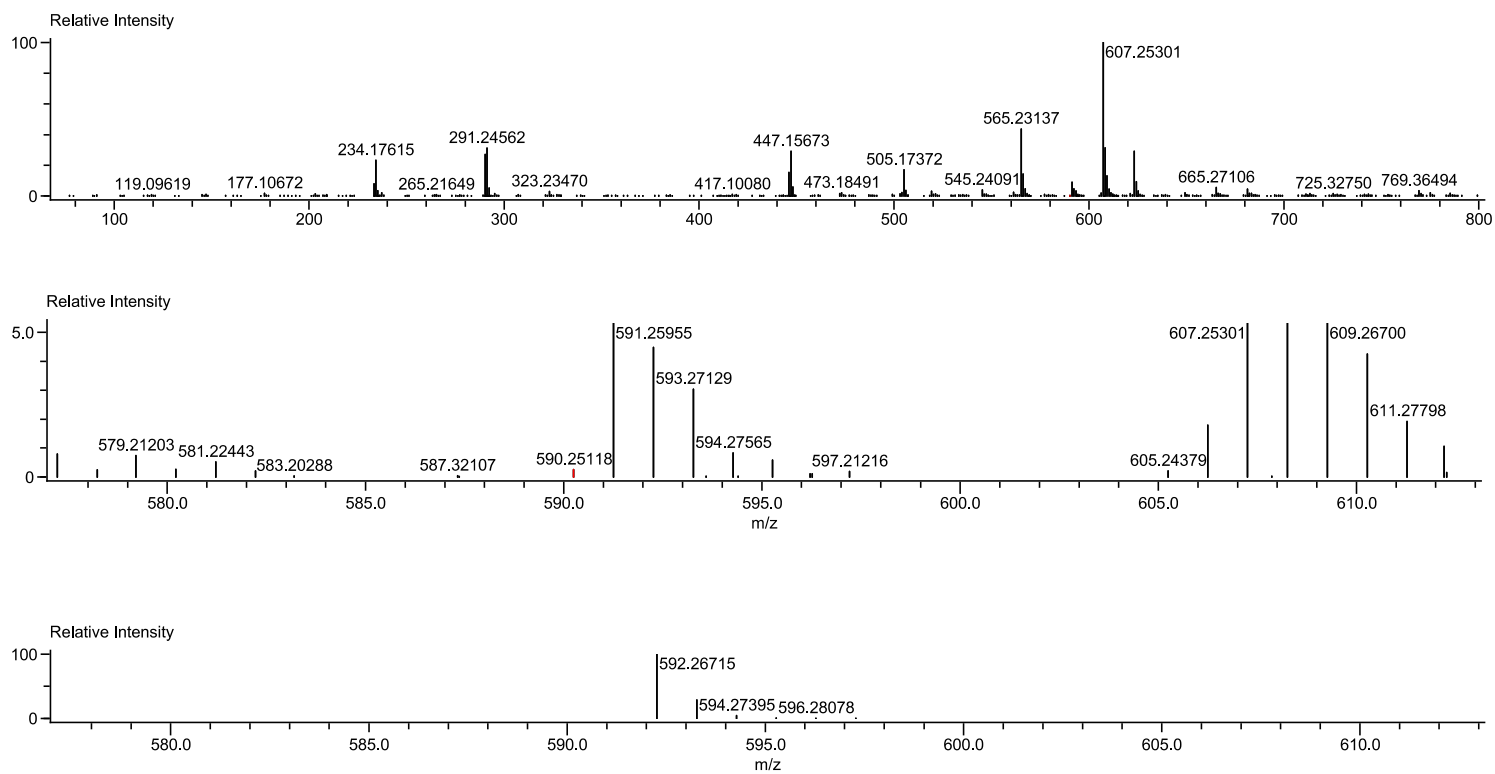

| Mass      | Intensity | Relative Intensity | Calc. Mass | Mass Difference [mDa] | Mass Difference [ppm] | Possible Formula                                                                                                       | Unsaturation Number |
|-----------|-----------|--------------------|------------|-----------------------|-----------------------|------------------------------------------------------------------------------------------------------------------------|---------------------|
| 592.26483 | 49003.65  | 4.47               | 592.26715  | -2.31                 | -3.91                 | <sup>12</sup> C <sub>26</sub> <sup>1</sup> H <sub>40</sub> <sup>209</sup> Bi <sub>1</sub> <sup>31</sup> P <sub>1</sub> | 9.0                 |

**Figure S1.5.** HR-Cl(+)<sup>+</sup> Mass spectrum of Mes<sub>2</sub>BiPtBu<sub>2</sub> (5) as [M]<sup>+</sup>. Top: Whole spectrum. Middle: High resolution extract. Bottom: Calculated isotope pattern.

## 1.6 Ph<sub>2</sub>BiP*t*Bu(SiMe<sub>3</sub>)<sub>3</sub> (**6**)

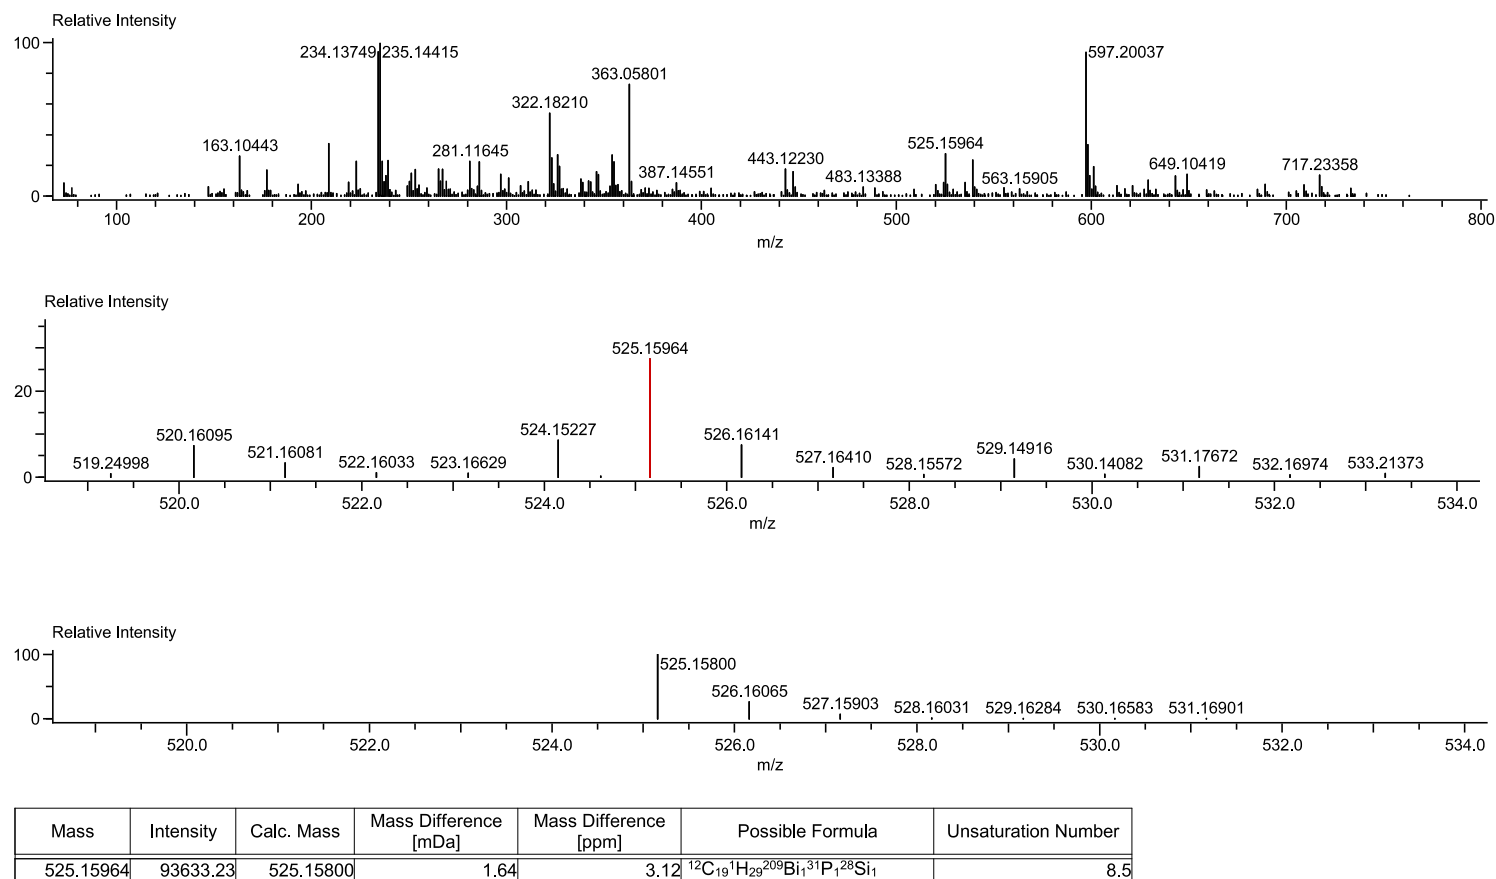

**Figure S1.6.** HR-Cl(+)<sup>+</sup> Mass spectrum of Ph<sub>2</sub>BiP*t*Bu(SiMe<sub>3</sub>) (**6**) as [M + H]<sup>+</sup>. Top: Whole spectrum. Middle: High resolution extract. Bottom: Calculated isotope pattern.

### 1.7 Mes<sub>2</sub>PtBu(SiMe<sub>3</sub>)<sub>3</sub> (7)

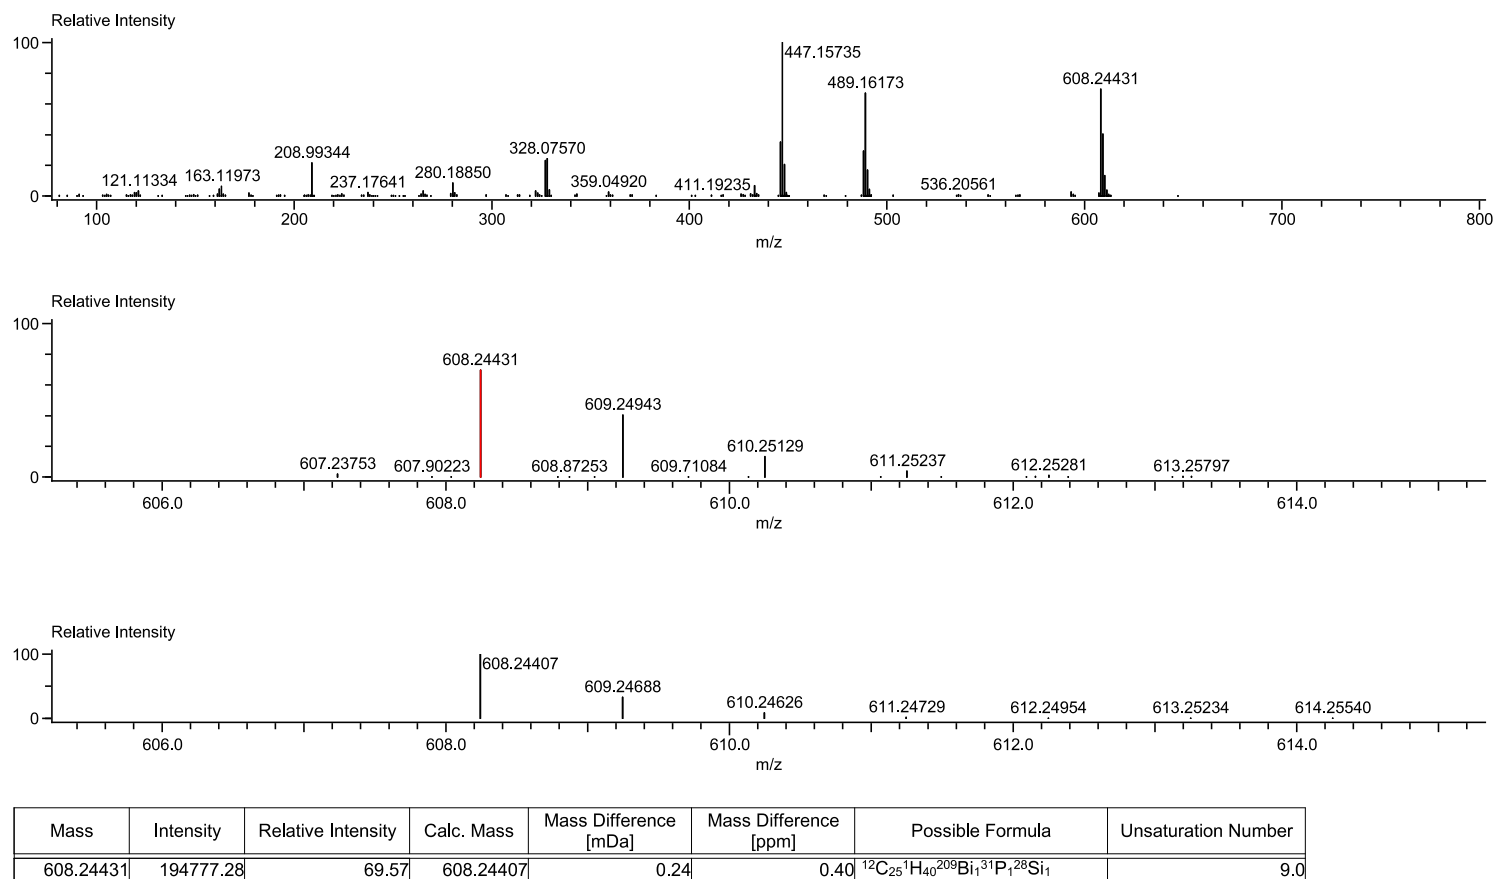

**Figure S1.7.** HR-Cl(+)  
Mass spectrum of Mes<sub>2</sub>BiPtBu(SiMe<sub>3</sub>)<sub>3</sub> (7) as [M + H]<sup>+</sup>. Top: Whole spectrum. Middle: High resolution extract. Bottom: Calculated isotope pattern.

## 1.8 Ph<sub>2</sub>BiAsiBu<sub>2</sub> (**8**)

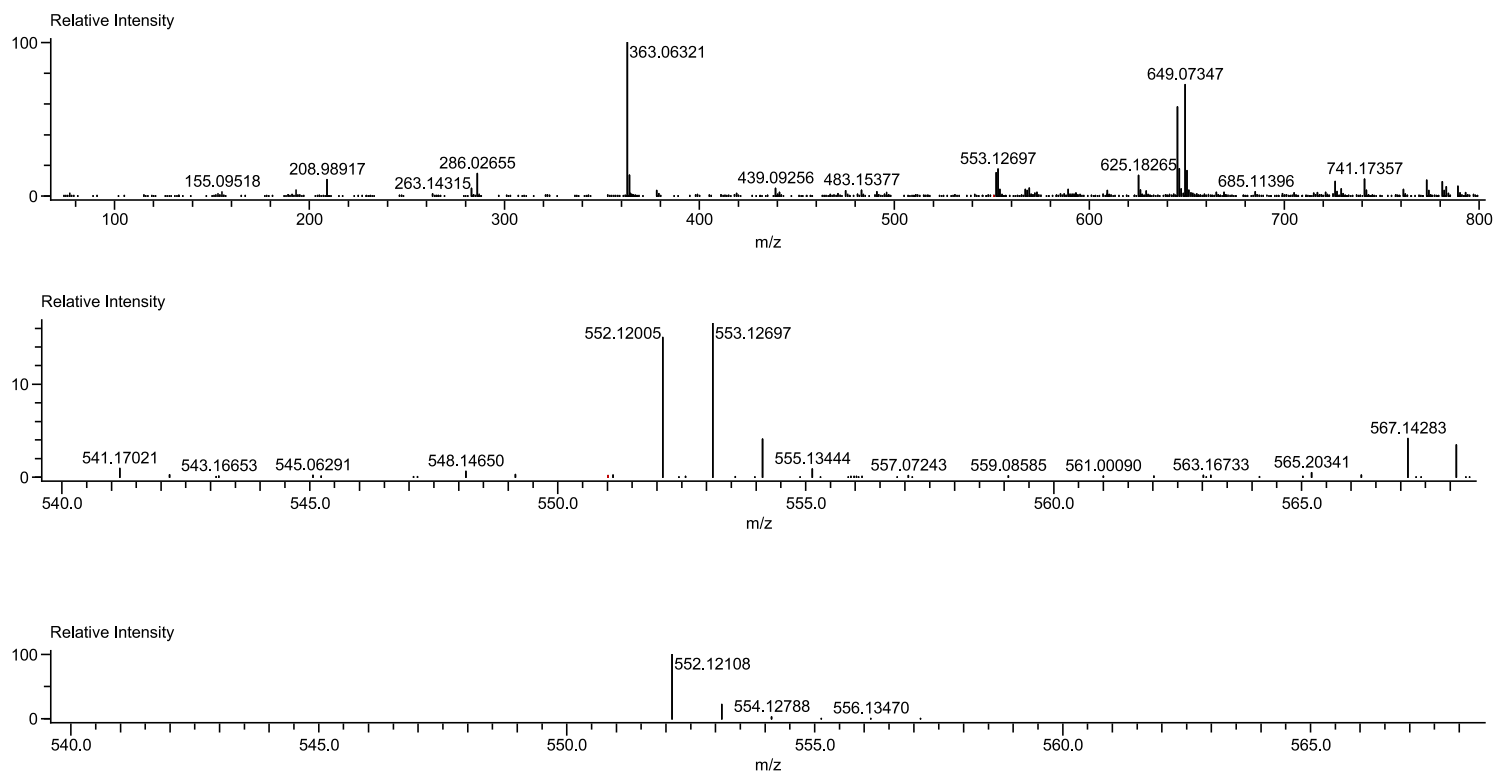

| Mass      | Intensity | Relative Intensity | Calc. Mass | Mass Difference [mDa] | Mass Difference [ppm] | Possible Formula                                                                                                        | Unsaturation Number |
|-----------|-----------|--------------------|------------|-----------------------|-----------------------|-------------------------------------------------------------------------------------------------------------------------|---------------------|
| 552.12005 | 173278.54 | 15.01              | 552.12108  | -1.03                 | -1.87                 | <sup>12</sup> C <sub>20</sub> <sup>1</sup> H <sub>28</sub> <sup>75</sup> As <sub>1</sub> <sup>209</sup> Bi <sub>1</sub> | 8.0                 |

**Figure S1.8.** HR-Cl(+)<sup>+</sup> Mass spectrum of Ph<sub>2</sub>BiAsiBu<sub>2</sub> (**8**) as [M]<sup>+</sup>. Top: Whole spectrum. Middle: High resolution extract. Bottom: Calculated isotope pattern.

## 1.9 Mes<sub>2</sub>BiAstBu<sub>2</sub> (9)

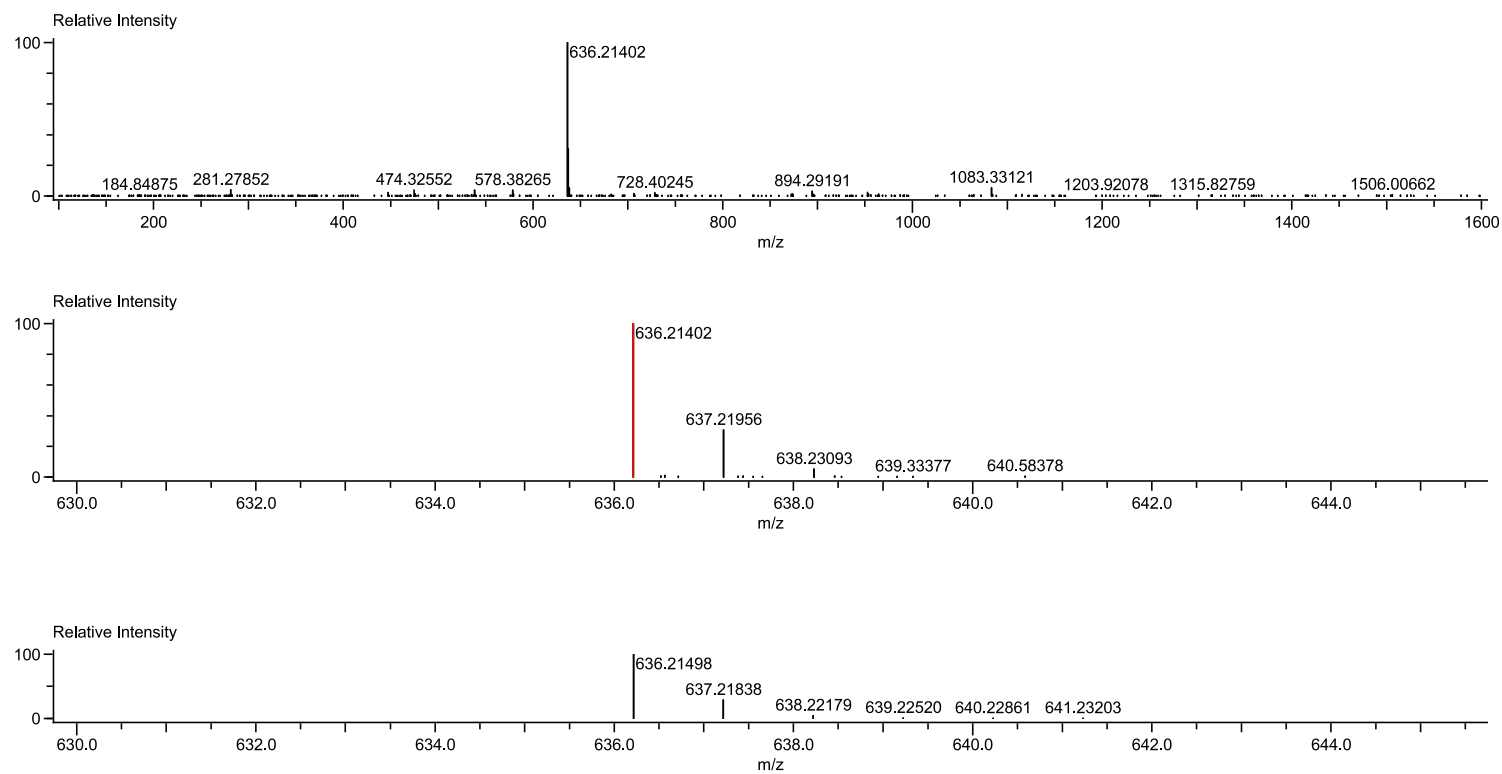

| Mass      | Intensity | Relative Intensity | Calc. Mass | Mass Difference [mDa] | Mass Difference [ppm] | Possible Formula                                                                                                        | Unsaturation Number |
|-----------|-----------|--------------------|------------|-----------------------|-----------------------|-------------------------------------------------------------------------------------------------------------------------|---------------------|
| 636.21402 | 29785.36  | 100.00             | 636.21498  | -0.96                 | -1.52                 | <sup>12</sup> C <sub>26</sub> <sup>1</sup> H <sub>40</sub> <sup>75</sup> As <sub>1</sub> <sup>209</sup> Bi <sub>1</sub> | 8.0                 |

**Figure S1.9.** HR-LIFDI(+) Mass spectrum of Mes<sub>2</sub>BiAstBu<sub>2</sub> (9) as [M]<sup>+</sup>. Top: Whole spectrum. Middle: High resolution extract. Bottom: Calculated isotope pattern.

### 1.10 Ph<sub>2</sub>BiAsfBu(SiMe<sub>3</sub>)<sub>3</sub> (**10**)

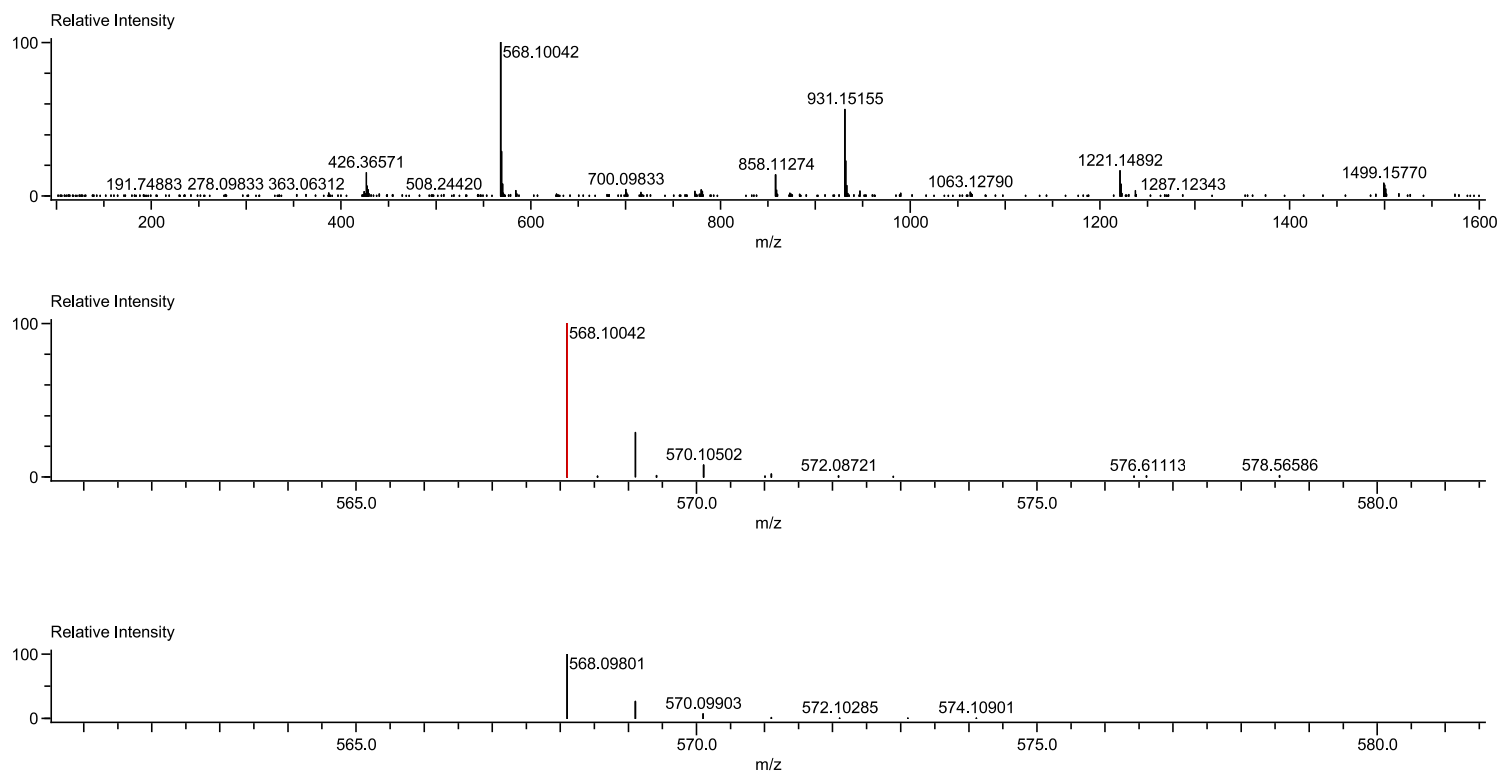

| Mass      | Intensity | Relative Intensity | Calc. Mass | Mass Difference [mDa] | Mass Difference [ppm] | Possible Formula                                                                                                                                      | Unsaturation Number |
|-----------|-----------|--------------------|------------|-----------------------|-----------------------|-------------------------------------------------------------------------------------------------------------------------------------------------------|---------------------|
| 568.10042 | 71038.63  | 100.00             | 568.09801  | 2.41                  | 4.25                  | <sup>12</sup> C <sub>19</sub> <sup>1</sup> H <sub>28</sub> <sup>75</sup> As <sub>1</sub> <sup>209</sup> Bi <sub>1</sub> <sup>28</sup> Si <sub>1</sub> | 8.0                 |

**Figure S1.10.** HR-LIFDI(+) Mass spectrum of Mes<sub>2</sub>BiAsfBu(SiMe<sub>3</sub>) (**10**) as [M]<sup>+</sup>. Top: Whole spectrum. Middle: High resolution extract. Bottom: Calculated isotope pattern.

### 1.11 Mes<sub>2</sub>BiAsfBu(SiMe<sub>3</sub>)<sub>3</sub> (11)

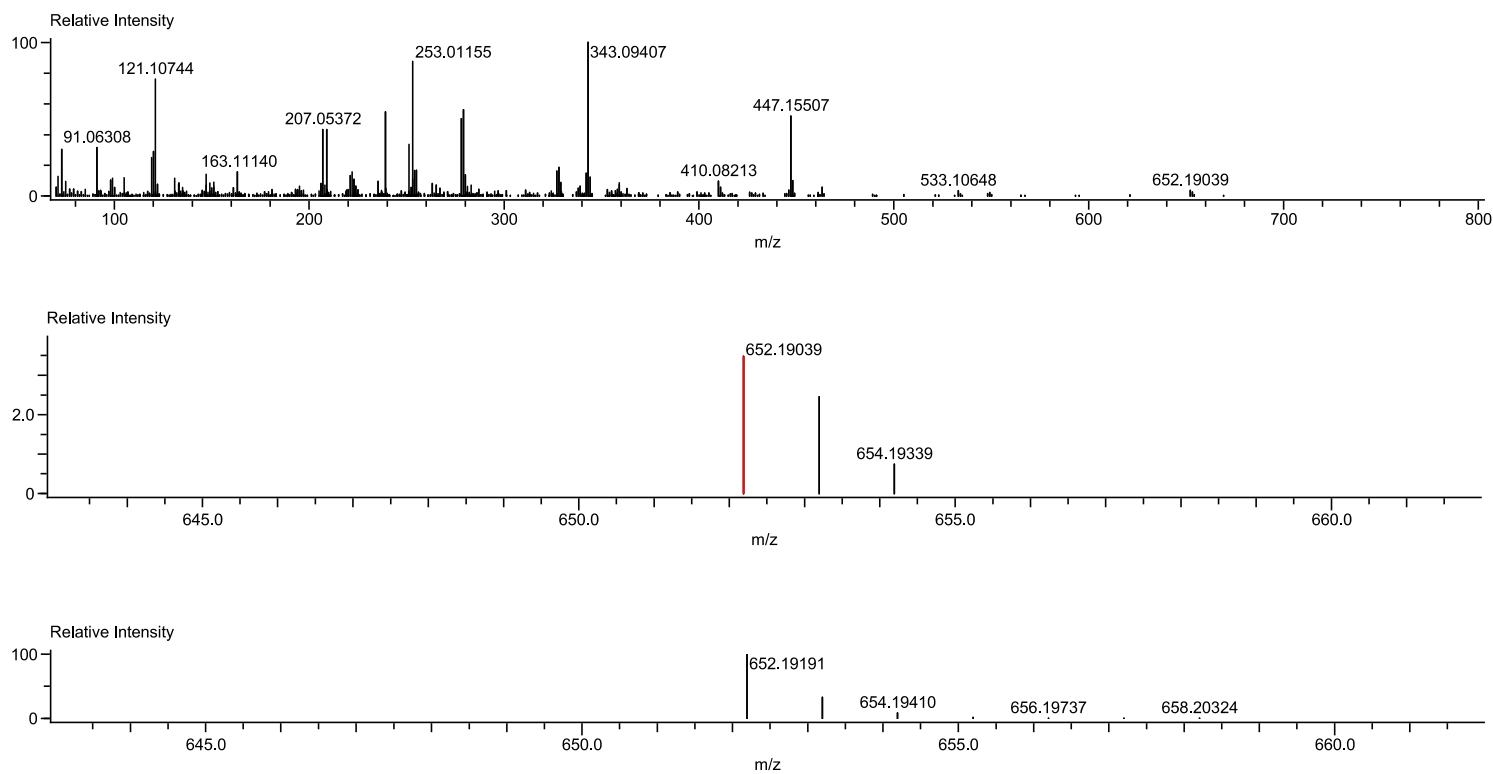

| Mass      | Intensity | Relative Intensity | Calc. Mass | Mass Difference [mDa] | Mass Difference [ppm] | Possible Formula                                                                                                                                      | Unsaturation Number |
|-----------|-----------|--------------------|------------|-----------------------|-----------------------|-------------------------------------------------------------------------------------------------------------------------------------------------------|---------------------|
| 652.19039 | 7122.62   | 3.48               | 652.19191  | -1.52                 | -2.33                 | <sup>12</sup> C <sub>25</sub> <sup>1</sup> H <sub>40</sub> <sup>75</sup> As <sub>1</sub> <sup>209</sup> Bi <sub>1</sub> <sup>28</sup> Si <sub>1</sub> | 8.0                 |

**Figure S1.11.** HR-Cl(+)<sup>+</sup> Mass spectrum of Mes<sub>2</sub>BiAsfBu(SiMe<sub>3</sub>) (11) as [M]<sup>+</sup>. Top: Whole spectrum. Middle: High resolution extract. Bottom: Calculated isotope pattern.



## 1.12 Ph<sub>2</sub>BiSbMes<sub>2</sub>

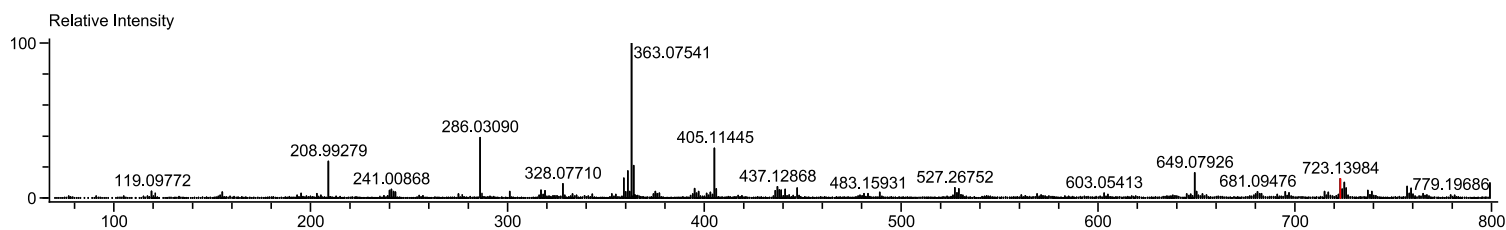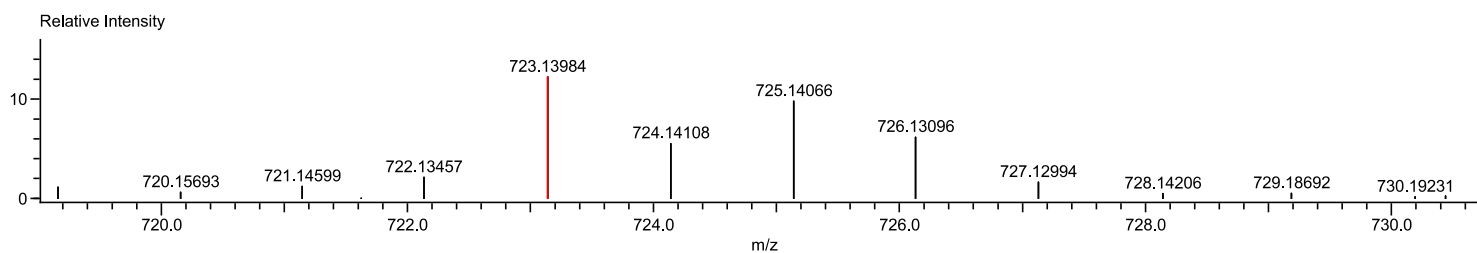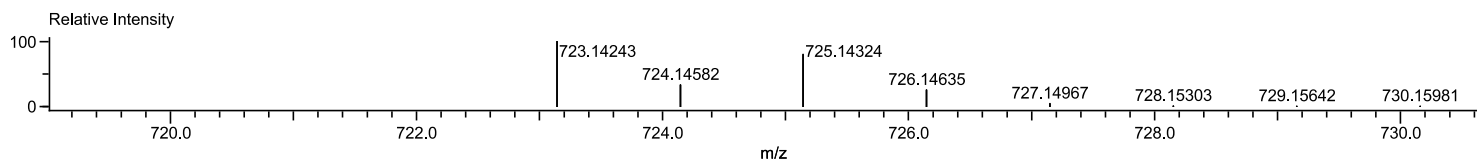

| Mass      | Intensity | Relative Intensity | Calc. Mass | Mass Difference [mDa] | Mass Difference [ppm] | Possible Formula                                                                                                         | Unsaturation Number |
|-----------|-----------|--------------------|------------|-----------------------|-----------------------|--------------------------------------------------------------------------------------------------------------------------|---------------------|
| 723.13984 | 806359.27 | 12.20              | 723.14243  | -2.59                 | -3.58                 | <sup>12</sup> C <sub>30</sub> <sup>1</sup> H <sub>33</sub> <sup>209</sup> Bi <sub>1</sub> <sup>121</sup> Sb <sub>1</sub> | 15.5                |

**Figure S1.12.** HR-Cl(+)<sup>+</sup> Mass spectrum of Ph<sub>2</sub>BiSbMes<sub>2</sub> (**12**) as [M + H]<sup>+</sup>. Top: Whole spectrum. Middle: High resolution extract. Bottom: Calculated isotope pattern.

### 1.13 Mes<sub>2</sub>BiSbMes<sub>2</sub>

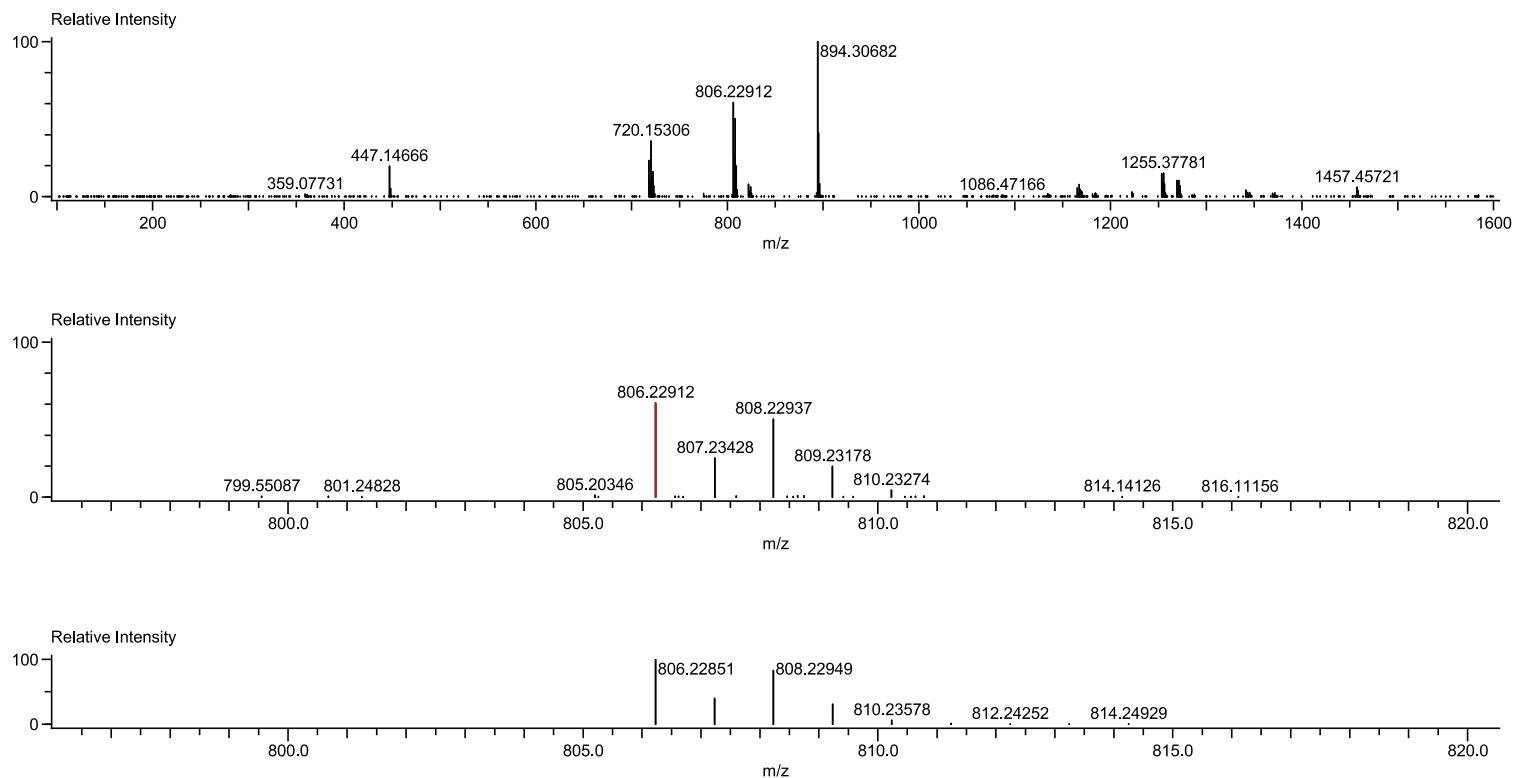

| Mass      | Intensity | Relative Intensity | Calc. Mass | Mass Difference [mDa] | Mass Difference [ppm] | Possible Formula                                                                                                         | Unsaturation Number |
|-----------|-----------|--------------------|------------|-----------------------|-----------------------|--------------------------------------------------------------------------------------------------------------------------|---------------------|
| 806.22912 | 36062.66  | 60.53              | 806.22851  | 0.61                  | 0.76                  | <sup>12</sup> C <sub>36</sub> <sup>1</sup> H <sub>44</sub> <sup>209</sup> Bi <sub>1</sub> <sup>121</sup> Sb <sub>1</sub> | 16.0                |

**Figure S1.13.** HR-LIFDI(+) Mass spectrum of a mixture of Mes<sub>2</sub>BiSbMes<sub>2</sub> (**13**) as [M]<sup>+</sup>, Mes<sub>4</sub>Bi<sub>2</sub> as [M]<sup>+</sup> (m/z = 894.30507) and Mes<sub>4</sub>Sb<sub>2</sub> as [M]<sup>+</sup> (m/z = 718.15194). Top: Whole spectrum. Middle: High resolution extract of Mes<sub>2</sub>BiSbMes<sub>2</sub> (**13**). Bottom: Calculated isotope pattern for Mes<sub>2</sub>BiSbMes<sub>2</sub> (**13**).

## 2. NMR spectra

### 2.1 Ph<sub>2</sub>BiNMe<sub>2</sub>

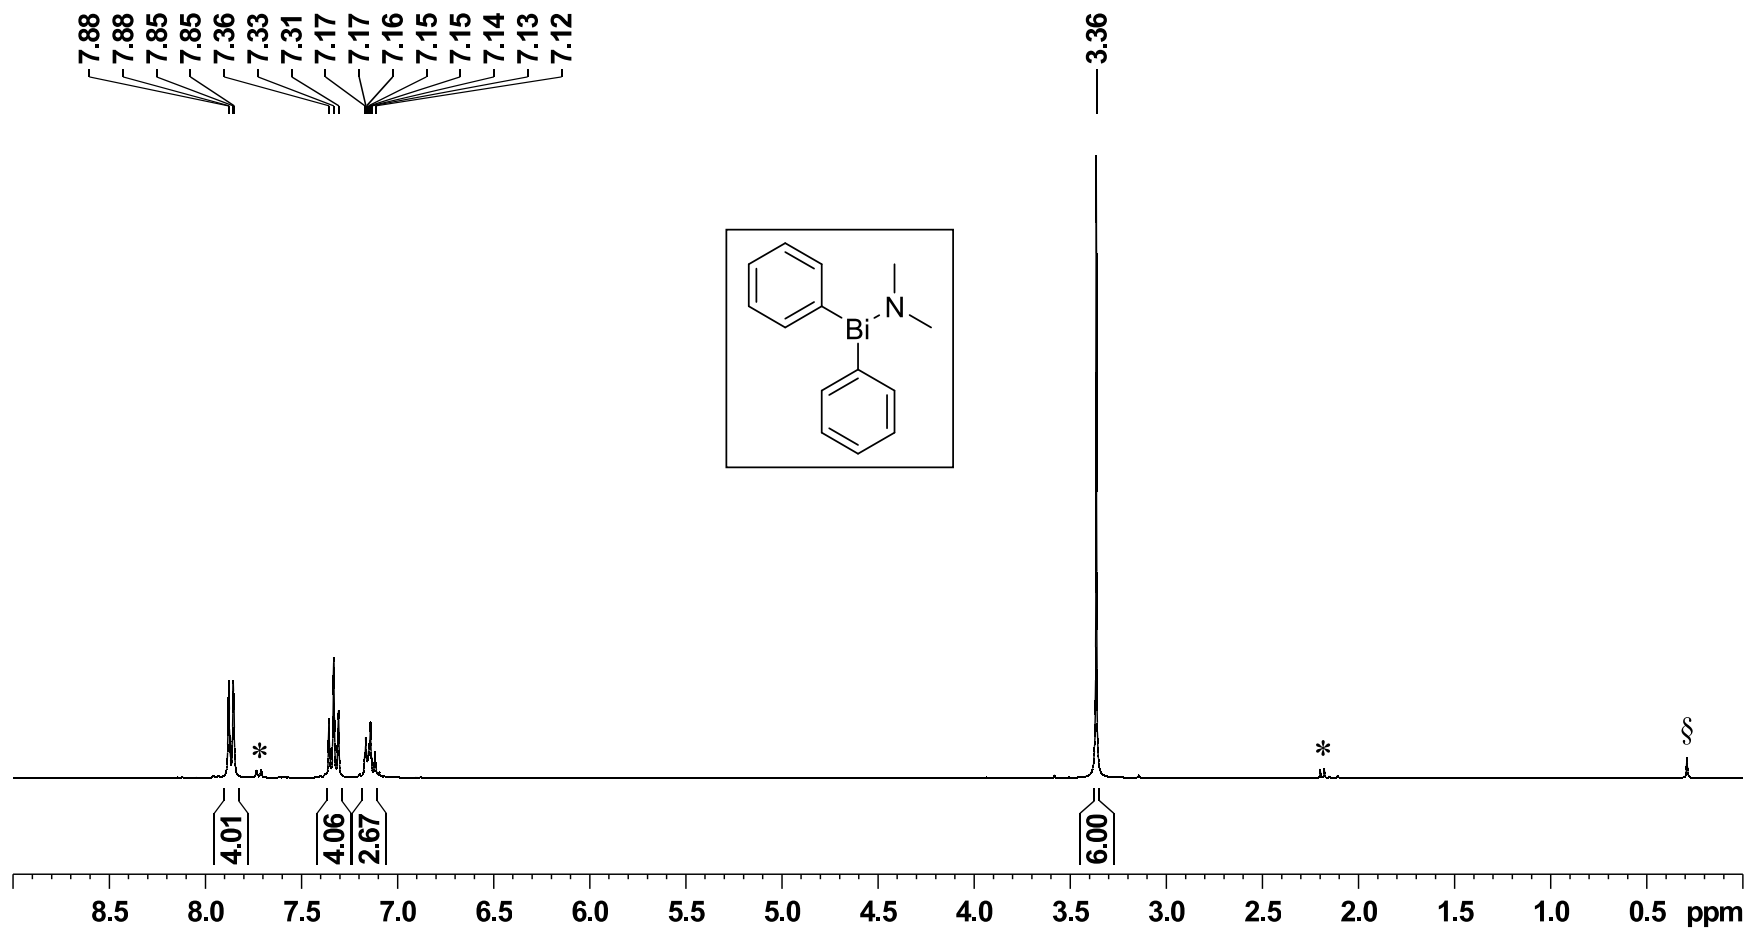

**Figure S2.1.1:** <sup>1</sup>H NMR spectrum (300 MHz) of **1** in C<sub>6</sub>D<sub>6</sub> at room temperature (\* = Unknown impurity, § = Silicon grease).

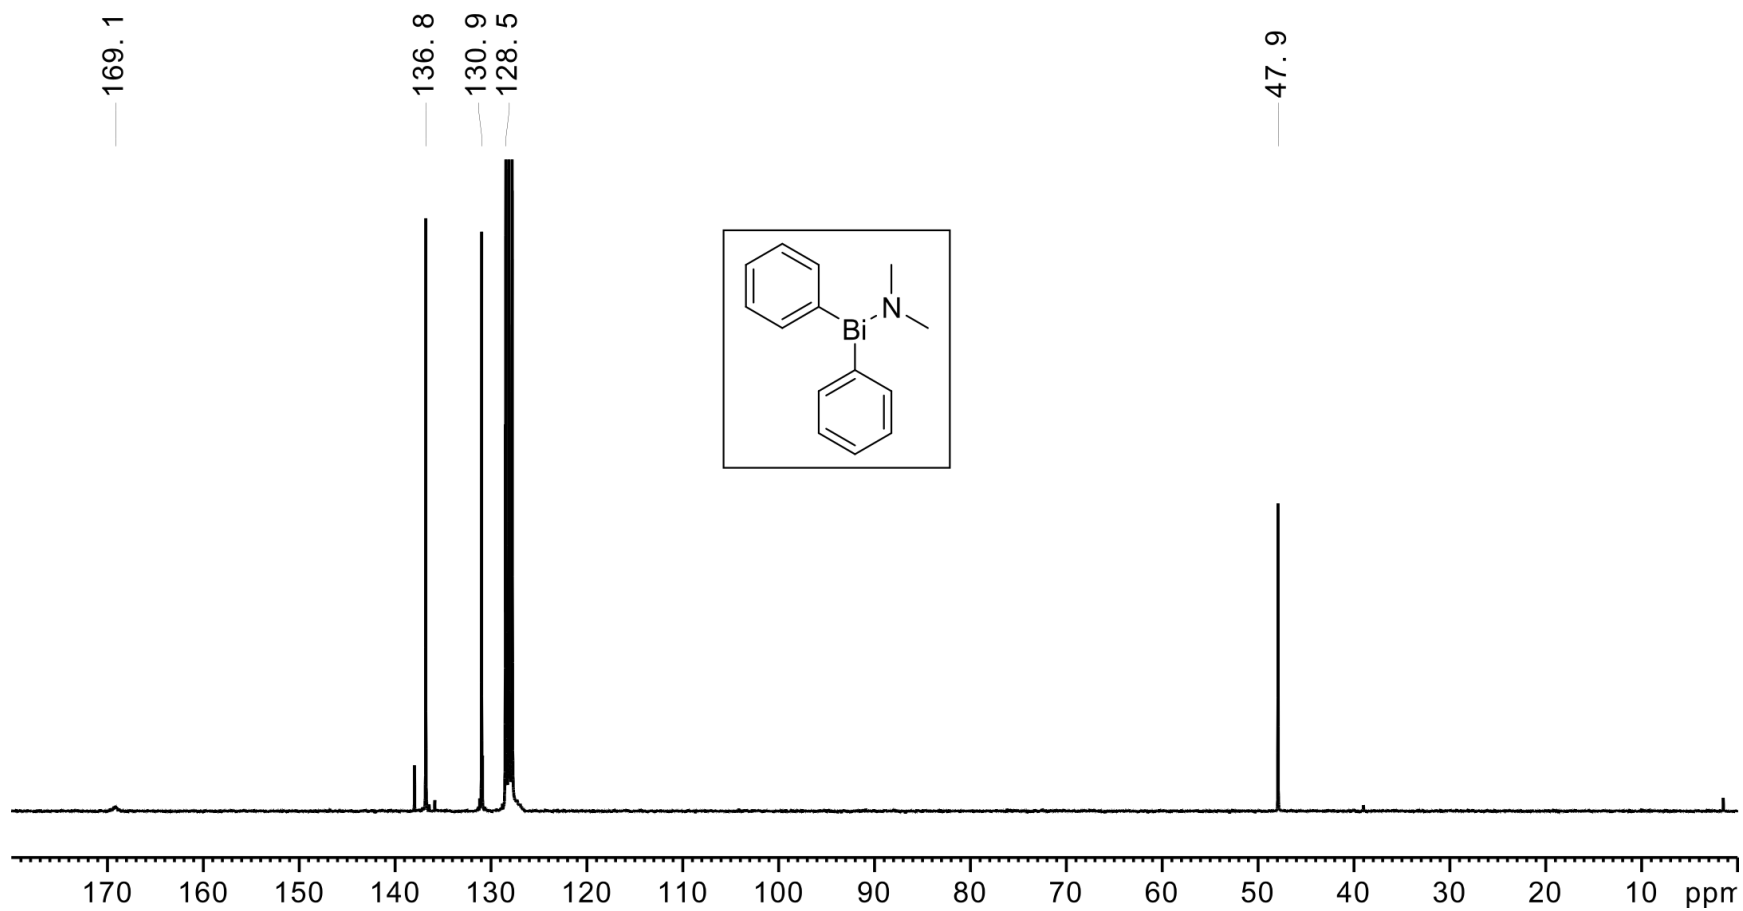

**Figure S2.1.2:**  $^{13}\text{C}$  NMR spectrum (75 MHz) of **1** in  $\text{C}_6\text{D}_6$  at room temperature.

2.2 Mes<sub>2</sub>BiNMe<sub>2</sub>

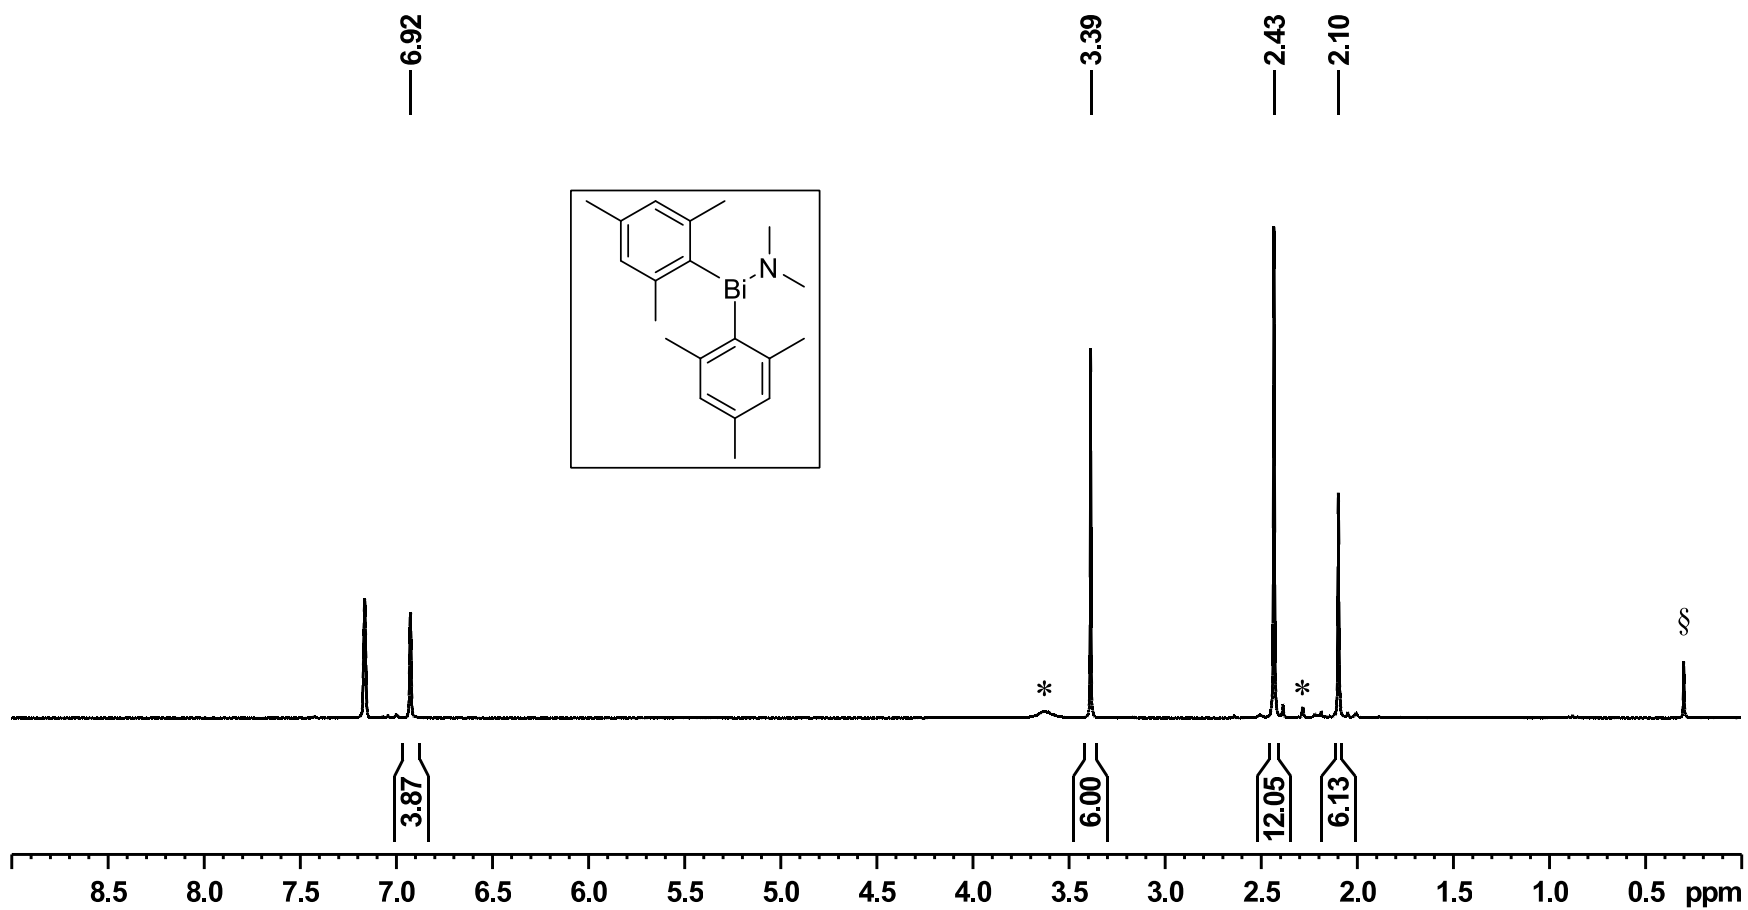

**Figure S2.2.1:** <sup>1</sup>H NMR spectrum (300 MHz) of **2** in C<sub>6</sub>D<sub>6</sub> at room temperature (\* = Unknown impurity, § = Silicon grease).

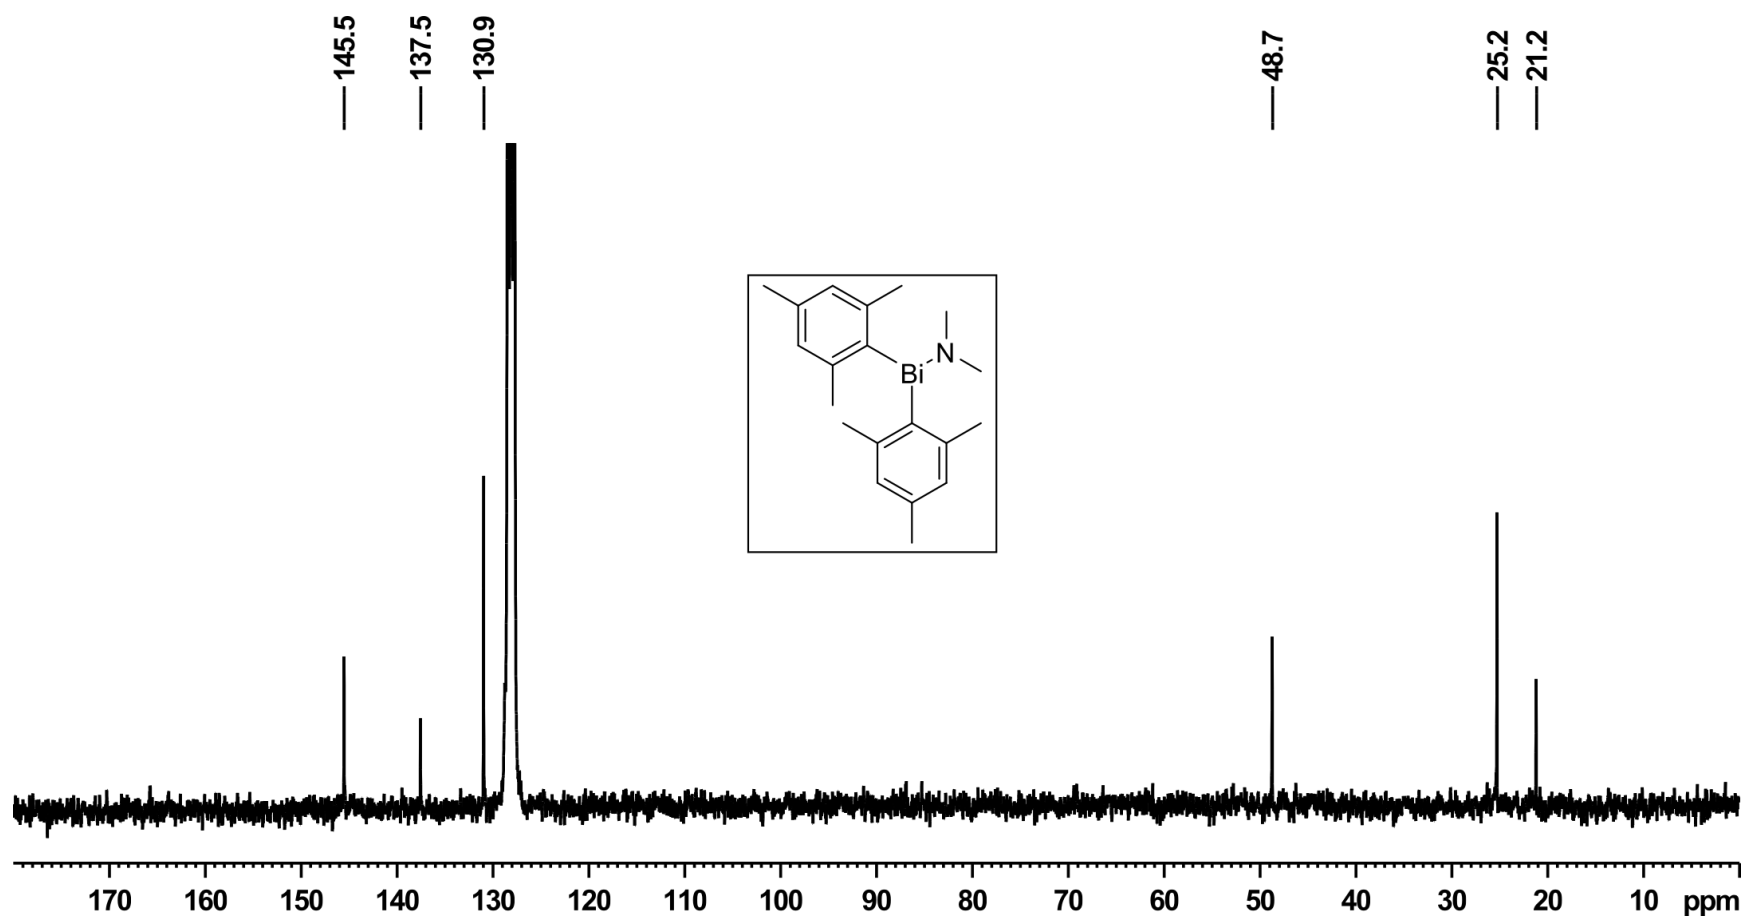

Figure S2.2.2:  $^{13}\text{C}$  NMR spectrum (75 MHz) of **2** in  $\text{C}_6\text{D}_6$  at room temperature.

### 2.3 Mes<sub>2</sub>BiNHtBu

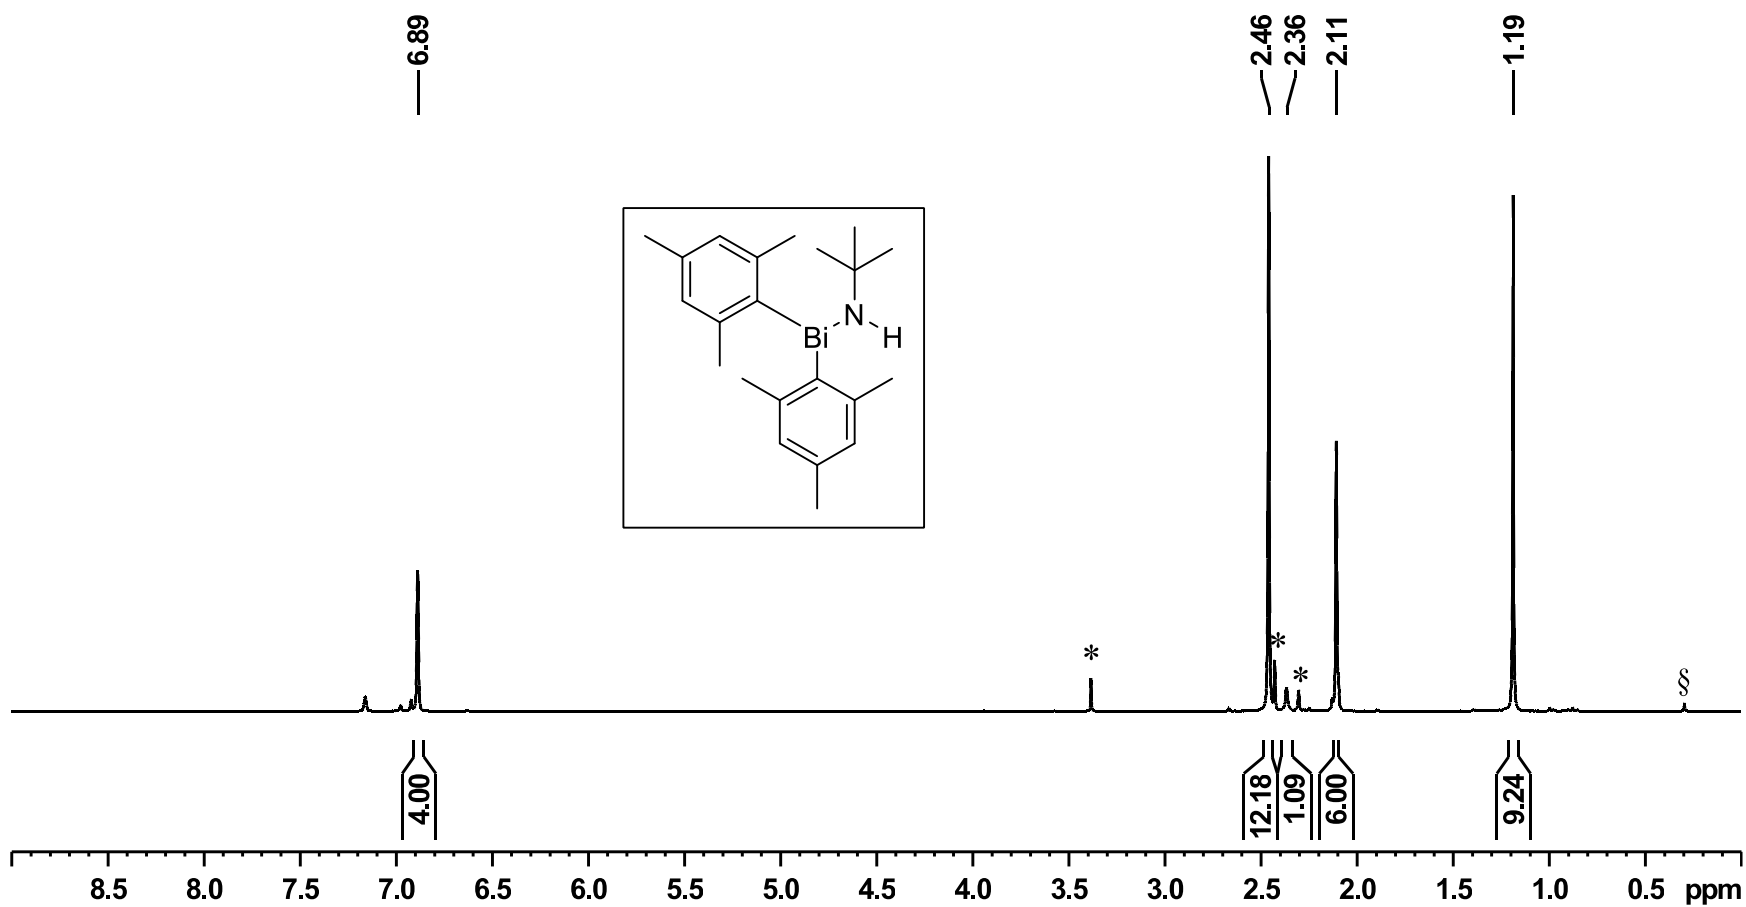

**Figure S2.3.1:** <sup>1</sup>H NMR spectrum (300 MHz) of **3** in C<sub>6</sub>D<sub>6</sub> at room temperature (\* = Mes<sub>2</sub>BiNMe<sub>2</sub> (**2**), § = Silicon grease).

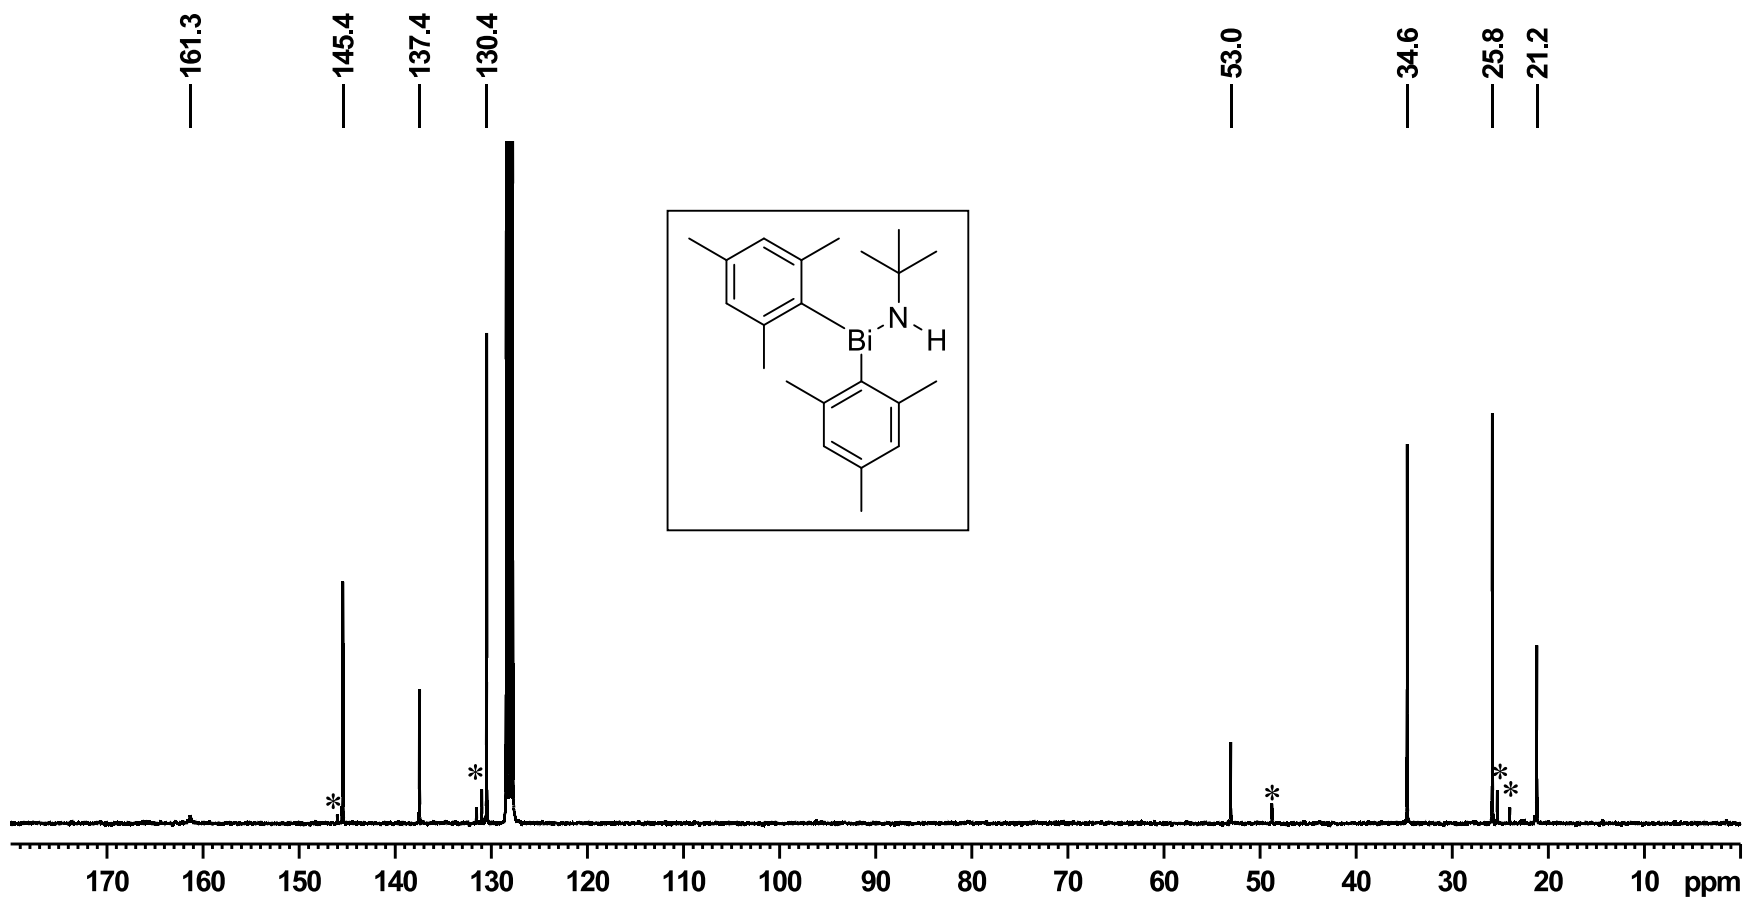

Figure S2.3.2:  $^{13}\text{C}$  NMR spectrum (75 MHz) of **3** in  $\text{C}_6\text{D}_6$  at room temperature (\* =  $\text{Mes}_2\text{BiNMe}_2$  (**2**)).



2.4 Ph<sub>2</sub>BiPtBu<sub>2</sub> (**4**)

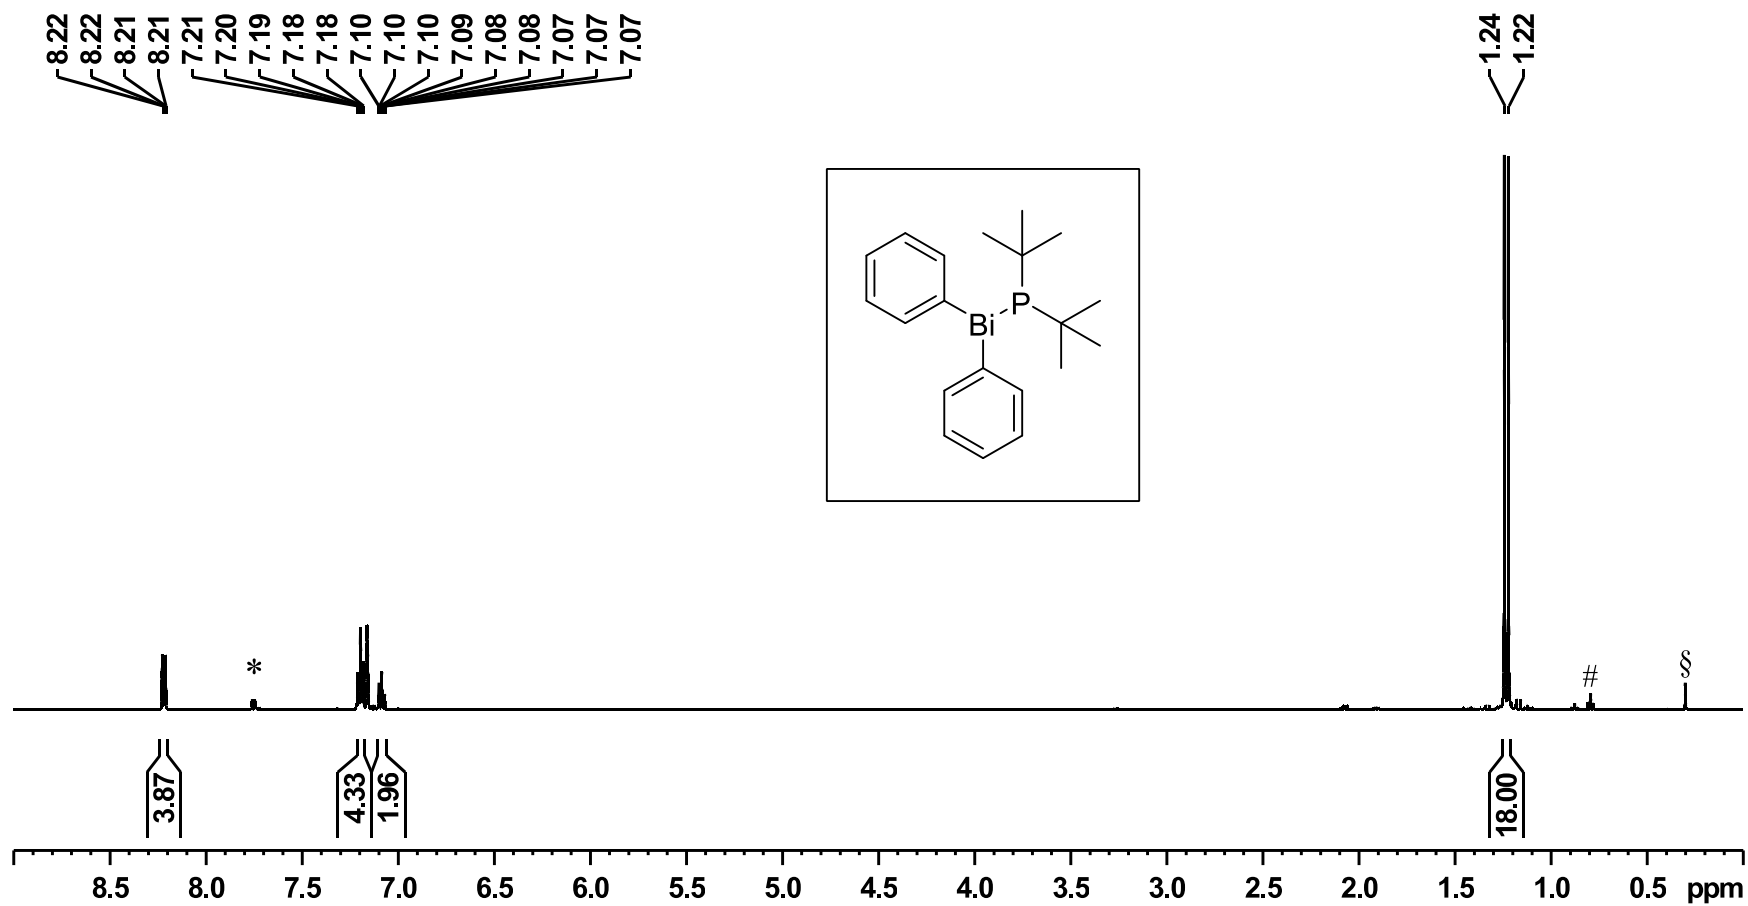

**Figure S2.4.1:** <sup>1</sup>H NMR spectrum (500 MHz) of **4** in C<sub>6</sub>D<sub>6</sub> at room temperature (\* = Unknown impurity, # = pentane, § = Silicon grease).

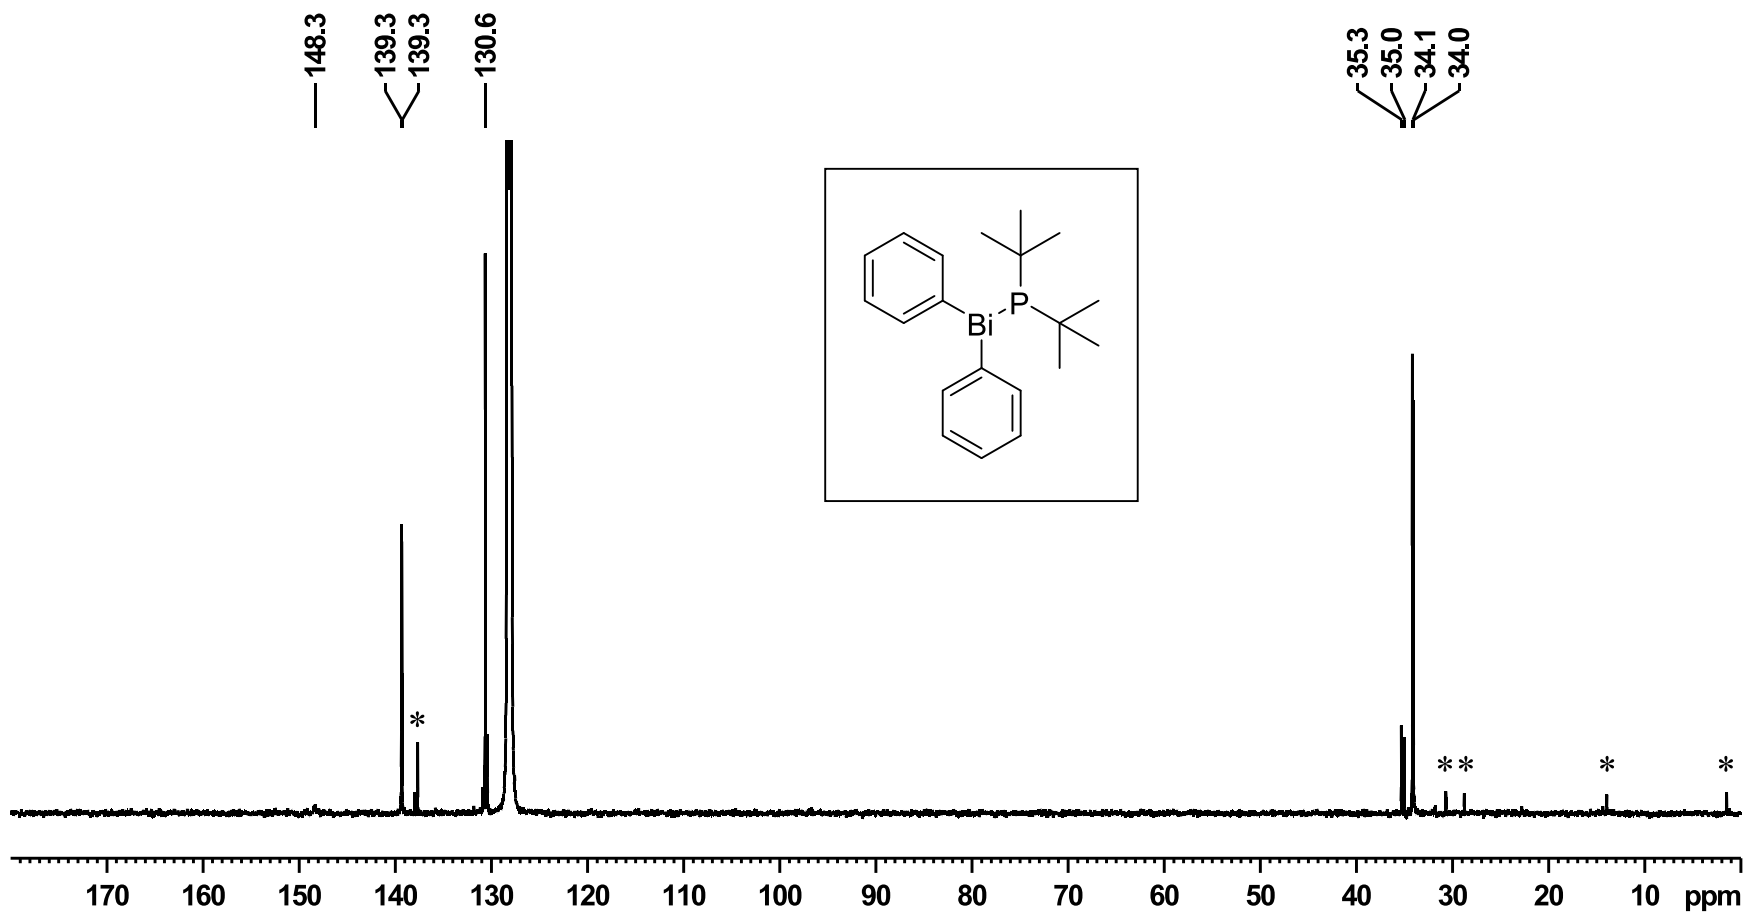

**Figure S2.4.2:**  $^{13}\text{C}$  NMR spectrum (125 MHz) of 4 in  $\text{C}_6\text{D}_6$  at room temperature (\* = Unknown impurity).

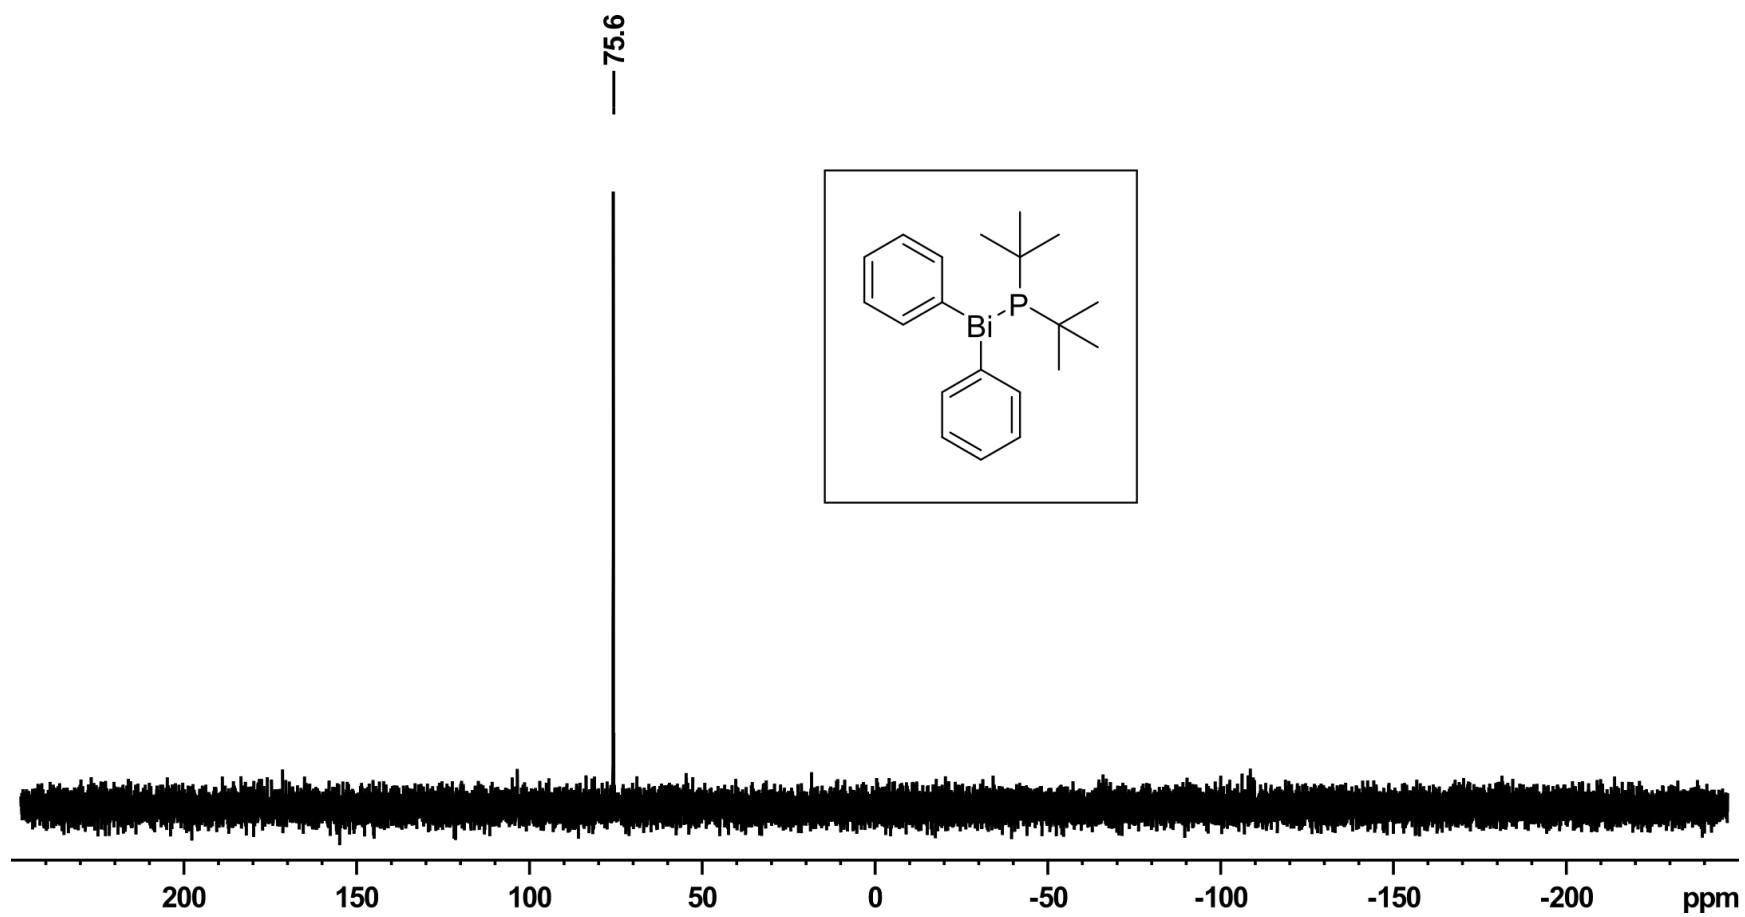

**Figure S2.4.3:**  $^{13}\text{P}\{^1\text{H}\}$  NMR spectrum (200 MHz) of **4** in  $\text{C}_6\text{D}_6$  at room temperature.

2.5 Mes<sub>2</sub>BiPtBu<sub>2</sub> (**5**)

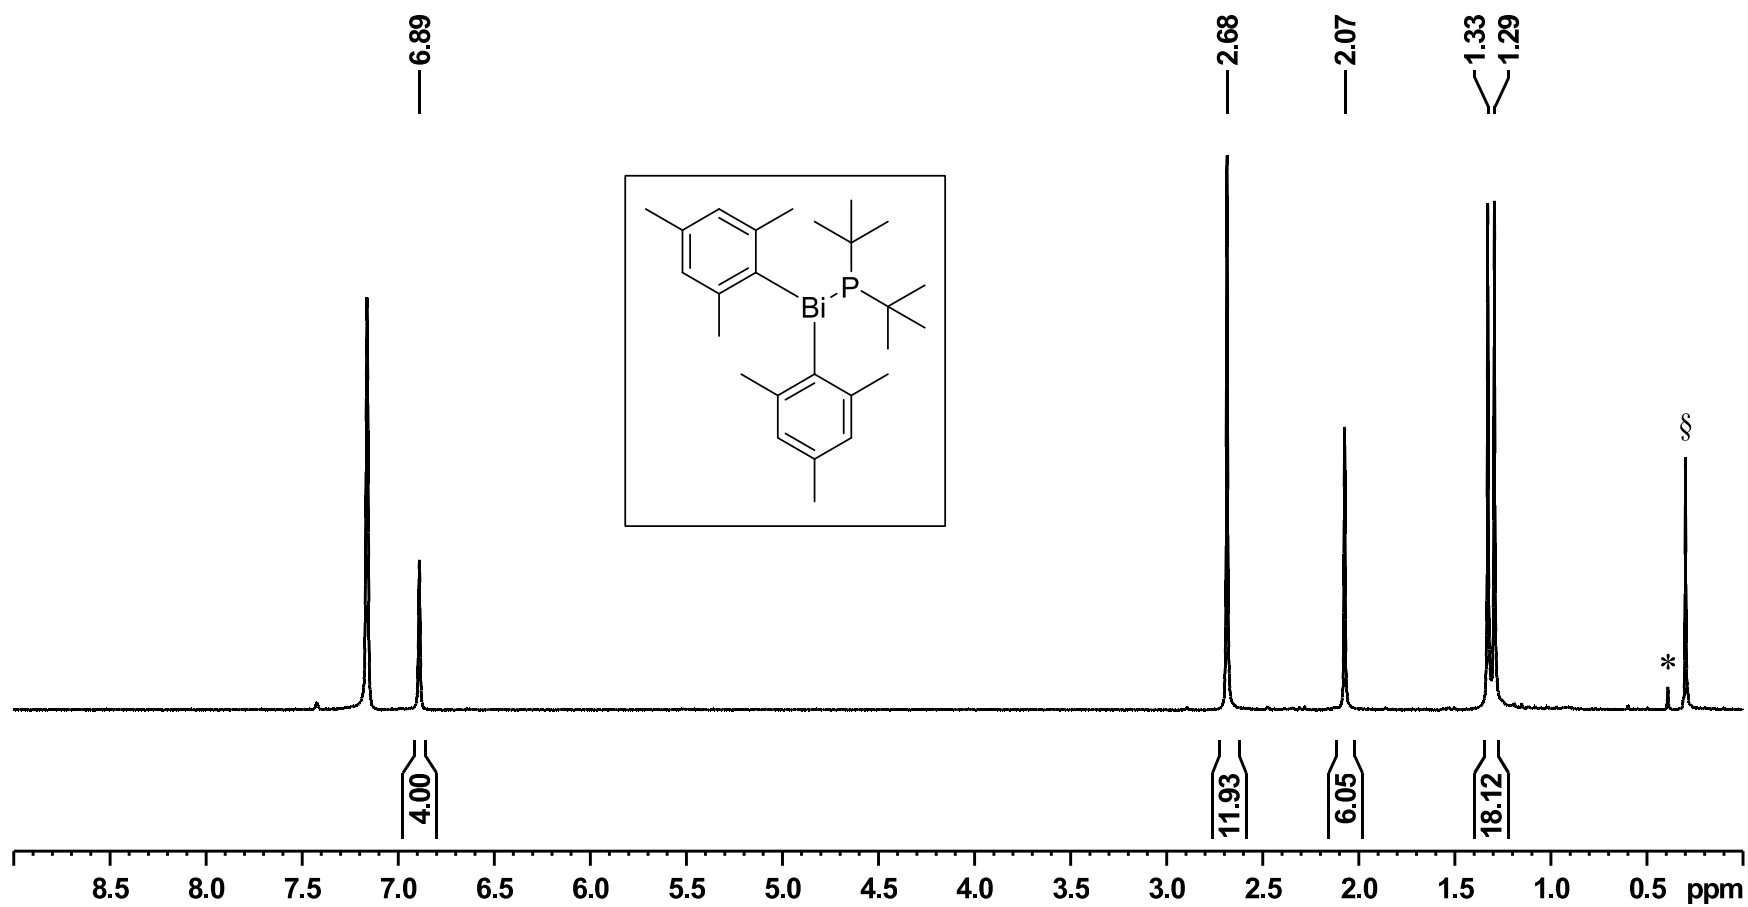

**Figure S2.5.1:** <sup>1</sup>H NMR spectrum (500 MHz) of **5** in C<sub>6</sub>D<sub>6</sub> at room temperature (\* = Unknown impurity, § = Silicon grease).

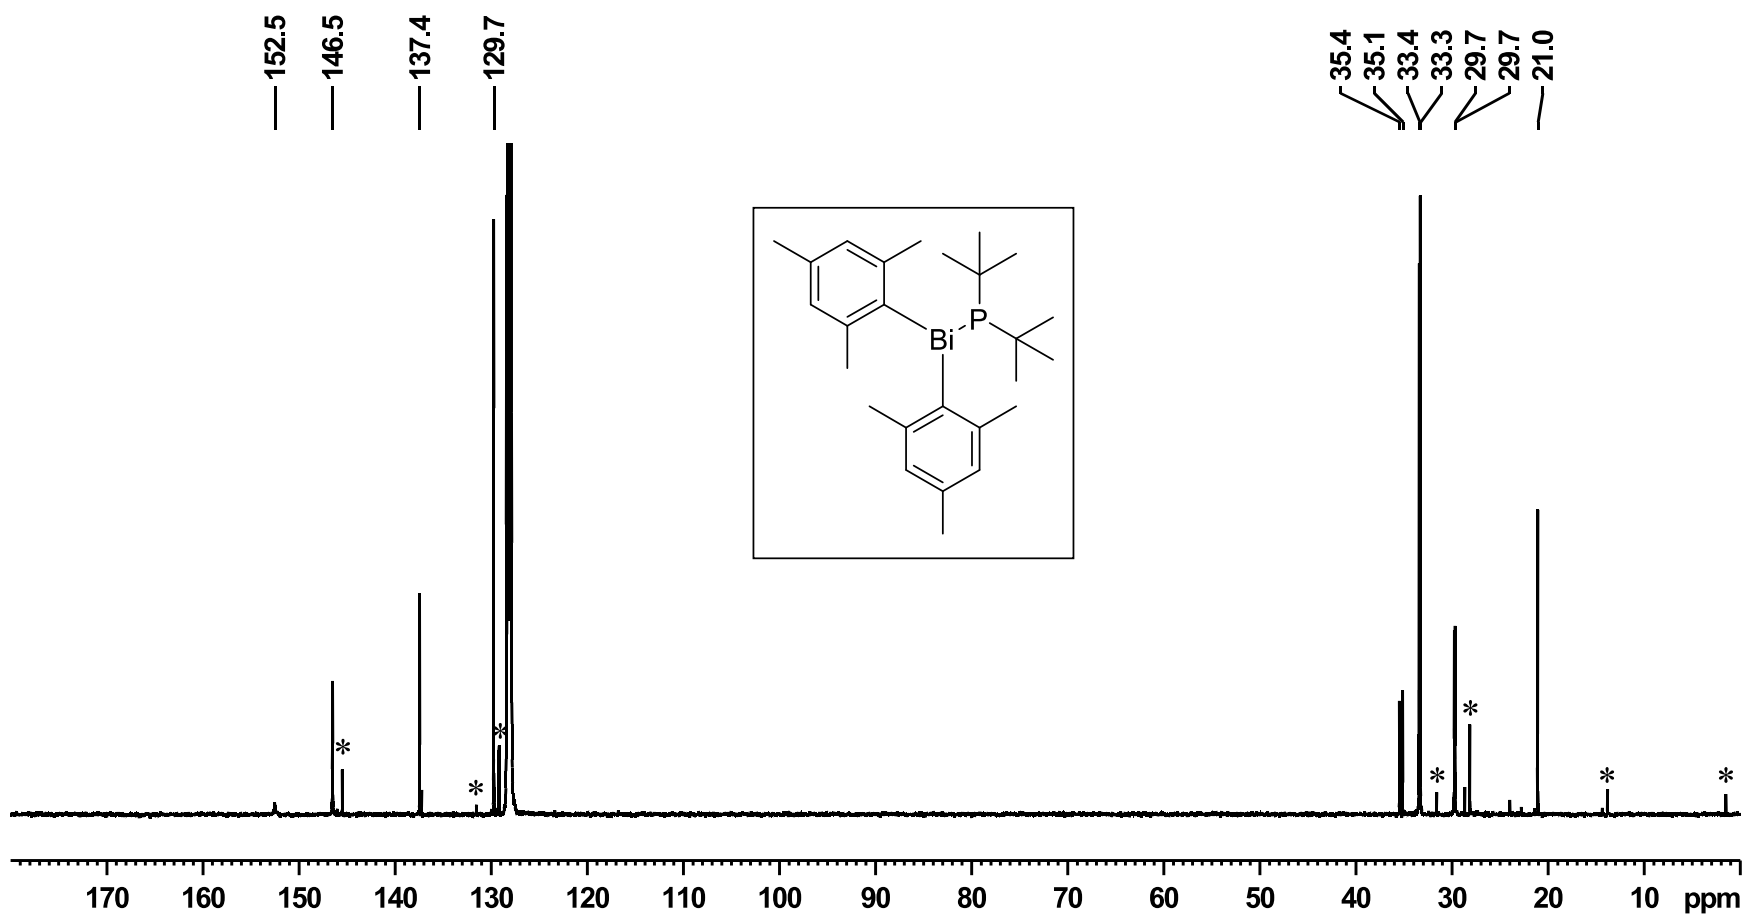

Figure S2.5.2:  $^{13}\text{C}$  NMR spectrum (125 MHz) of 5 in  $\text{C}_6\text{D}_6$  at room temperature (\* = Unknown impurity).

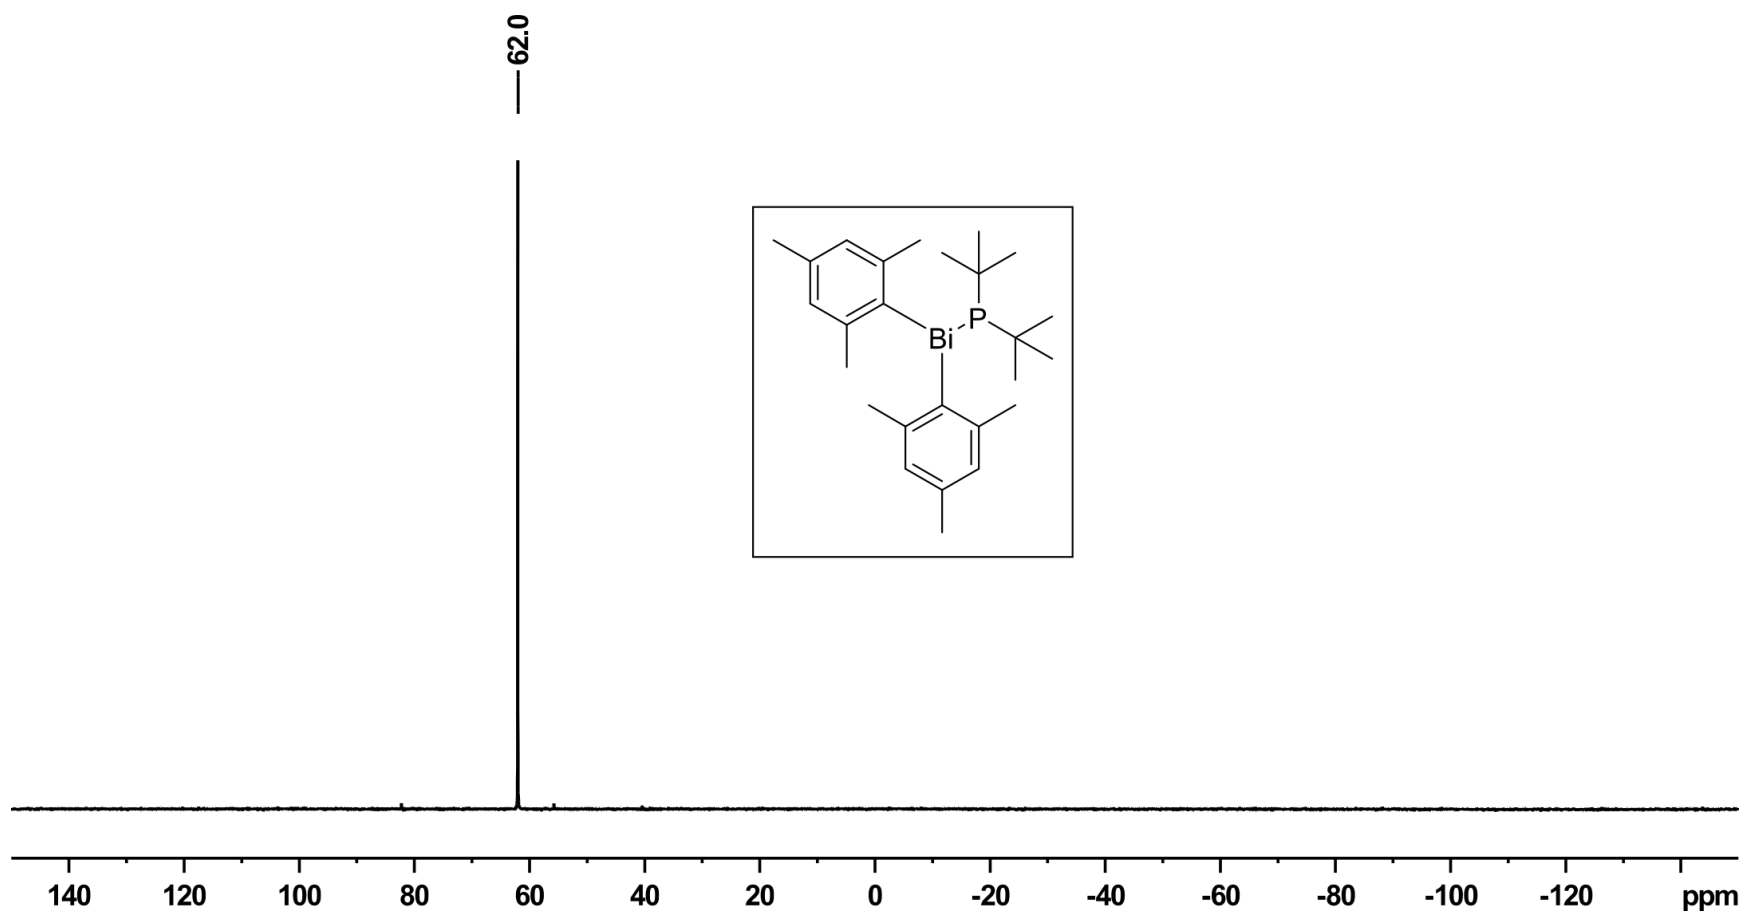

**Figure S2.5.3:**  $^{31}\text{P}\{^1\text{H}\}$  NMR spectrum (125 MHz) of **5** in  $\text{C}_6\text{D}_6$  at room temperature.

2.6 Ph<sub>2</sub>BiPtBu(SiMe<sub>3</sub>)<sub>3</sub> (**6**)

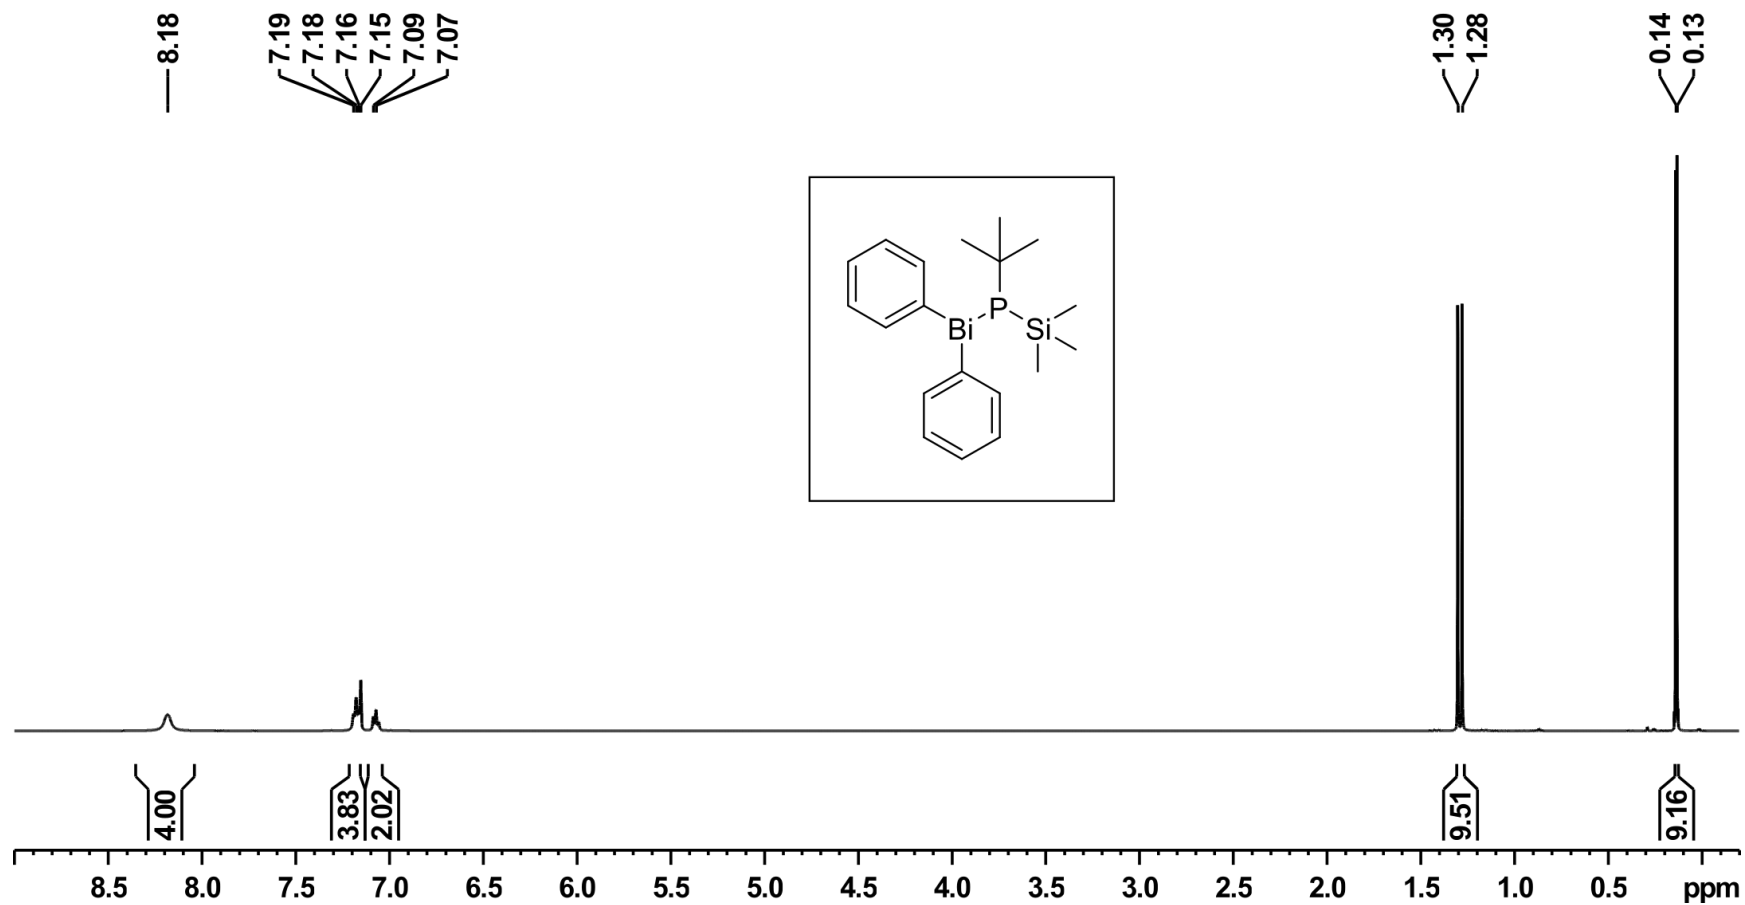

Figure S2.6.1: <sup>1</sup>H NMR spectrum (500 MHz) of **6** in C<sub>6</sub>D<sub>6</sub> at room temperature.

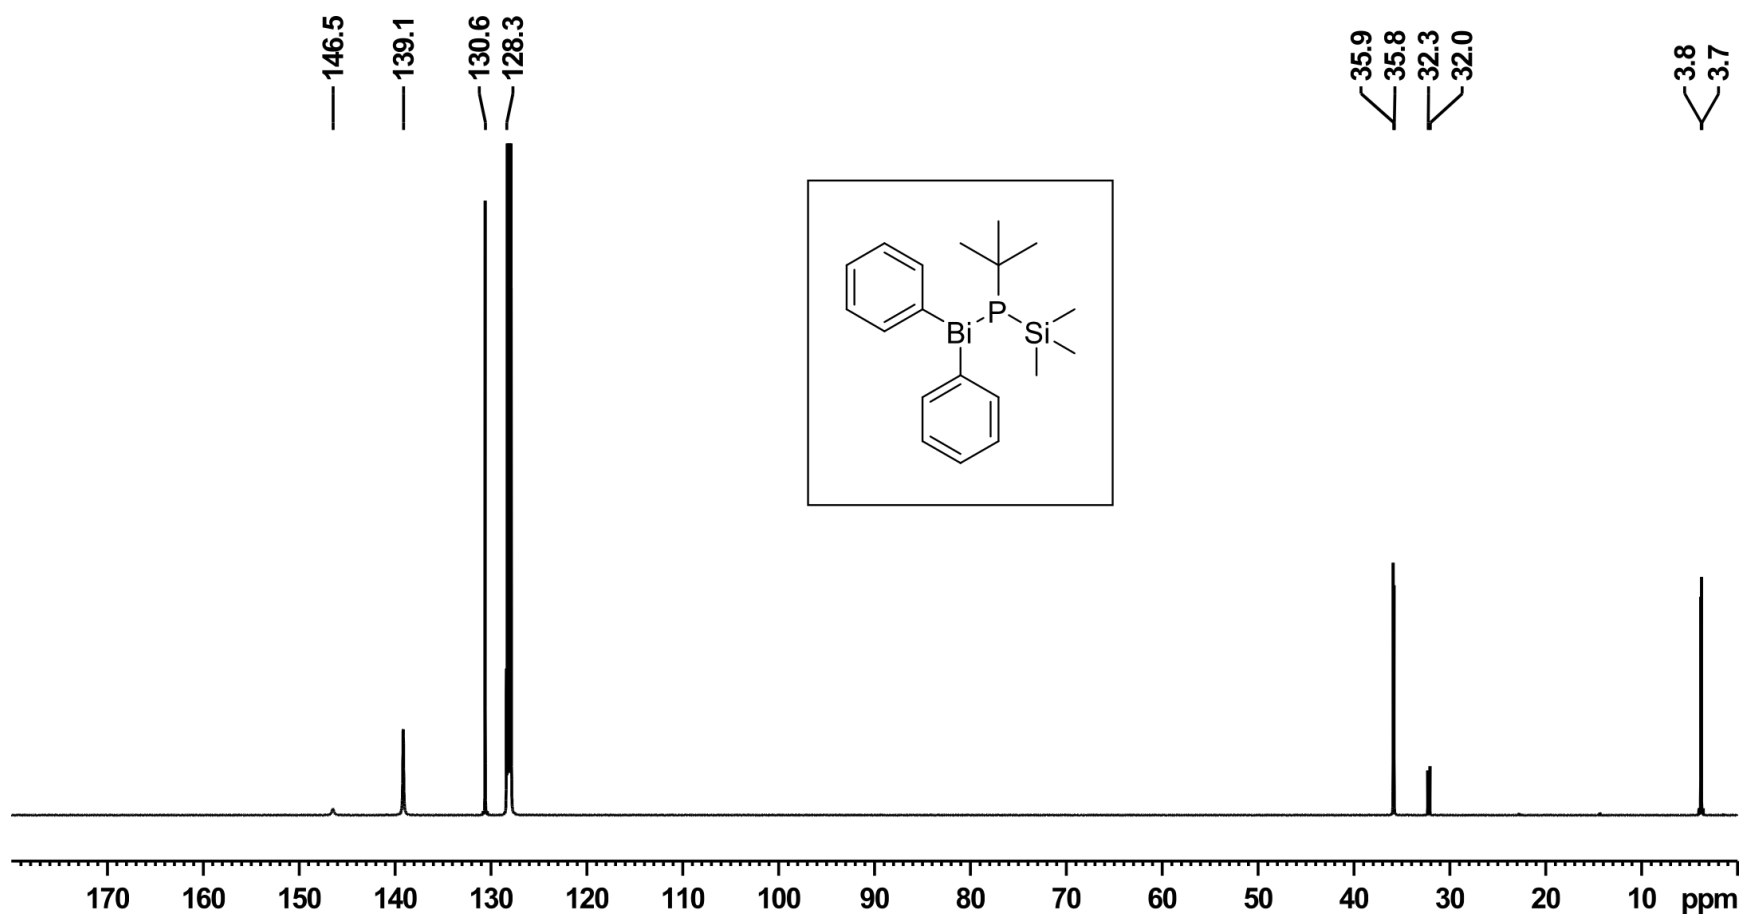

**Figure S2.6.2:**  $^{13}\text{C}$  NMR spectrum (125 MHz) of **6** in  $\text{C}_6\text{D}_6$  at room temperature.



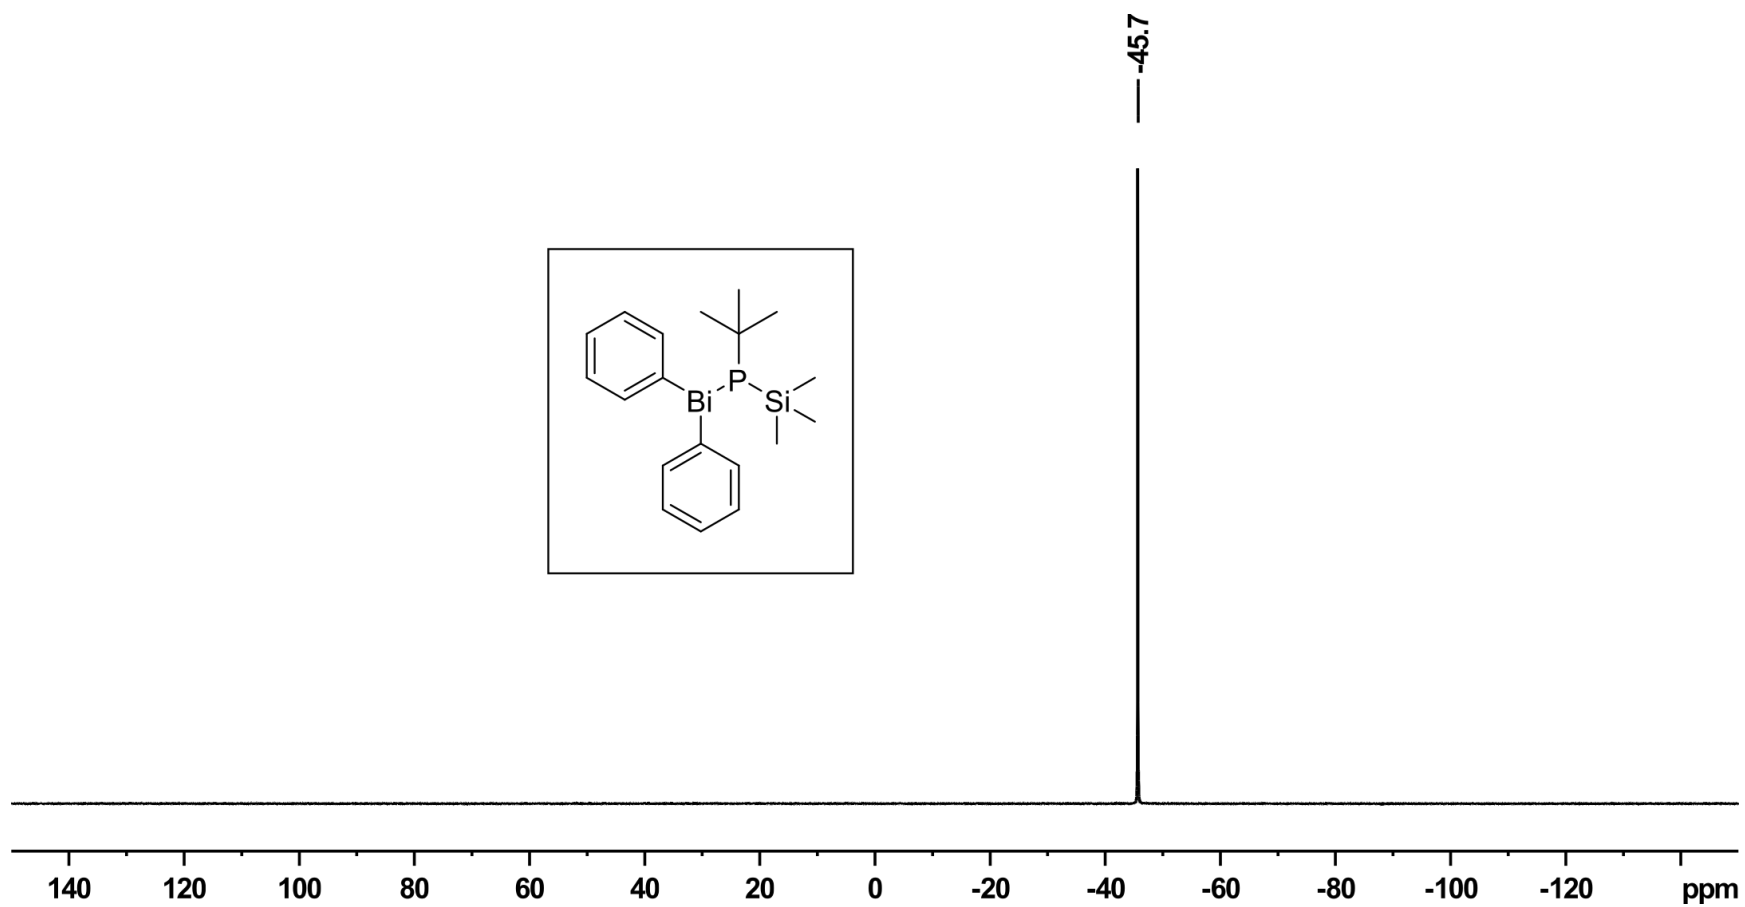

**Figure S2.6.3:**  $^{31}\text{P}\{^1\text{H}\}$  NMR spectrum (200 MHz) of **6** in  $\text{C}_6\text{D}_6$  at room temperature.

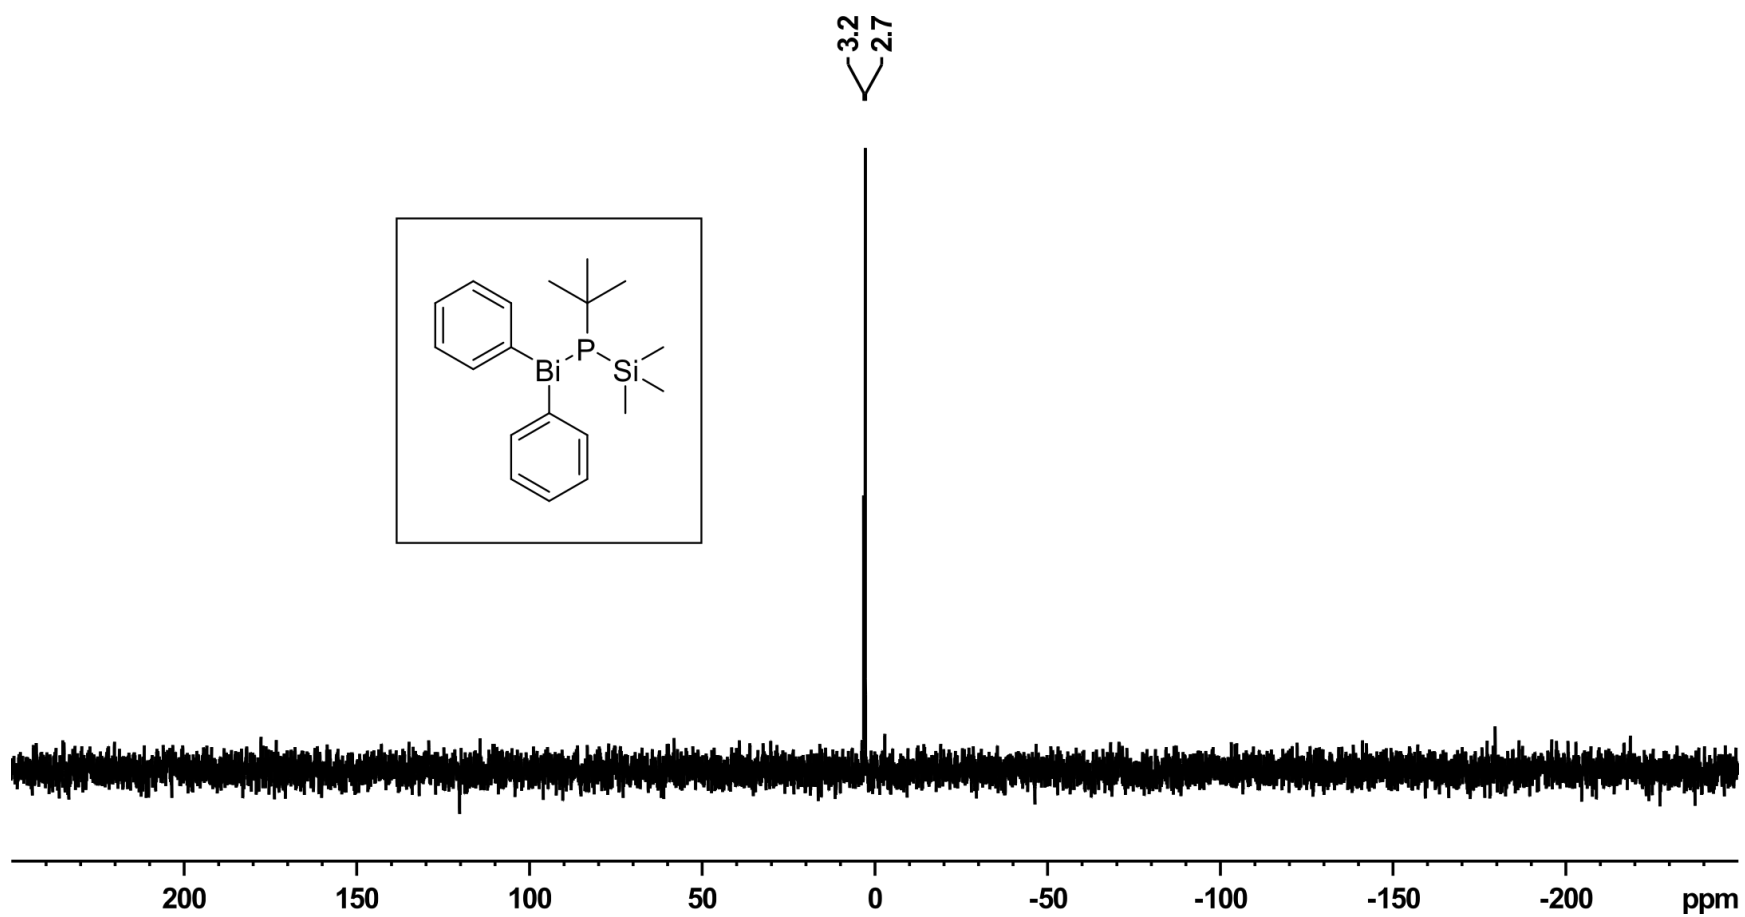

**Figure S2.6.4:**  $^{29}\text{Si}$ -DEPT NMR spectrum (99 MHz) of **6** in  $\text{C}_6\text{D}_6$  at room temperature.

2.7 Mes<sub>2</sub>BiPtBu(SiMe<sub>3</sub>)<sub>3</sub> (**7**)

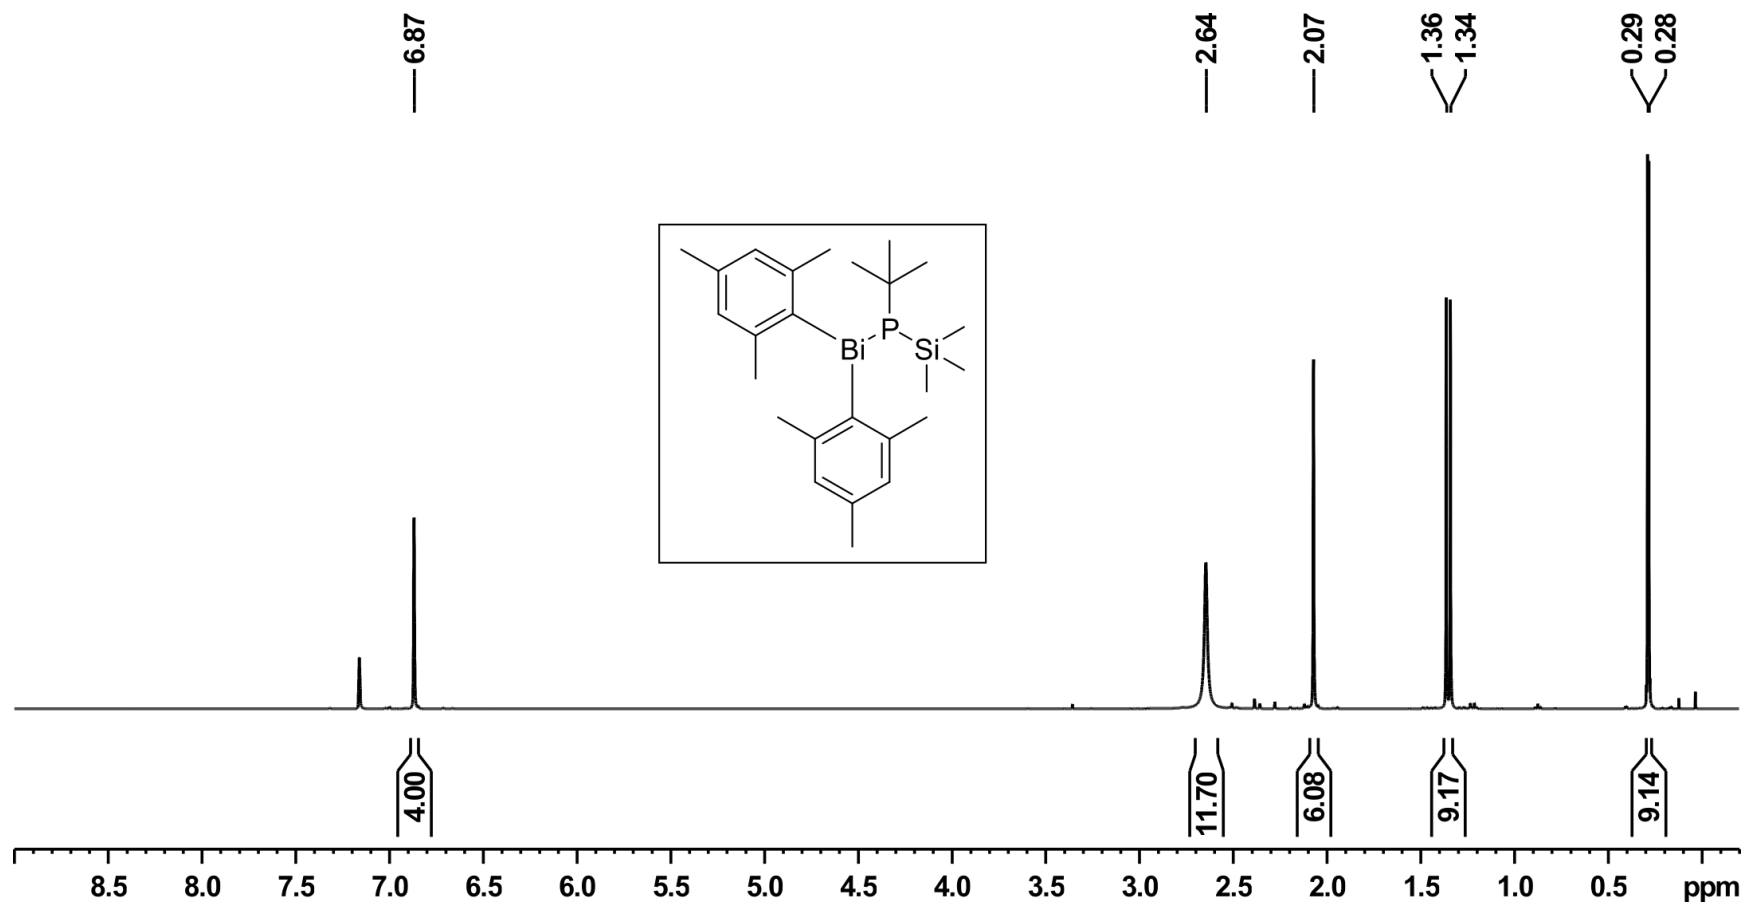

Figure S2.7.1: <sup>1</sup>H NMR spectrum (500 MHz) of **7** in C<sub>6</sub>D<sub>6</sub> at room temperature.

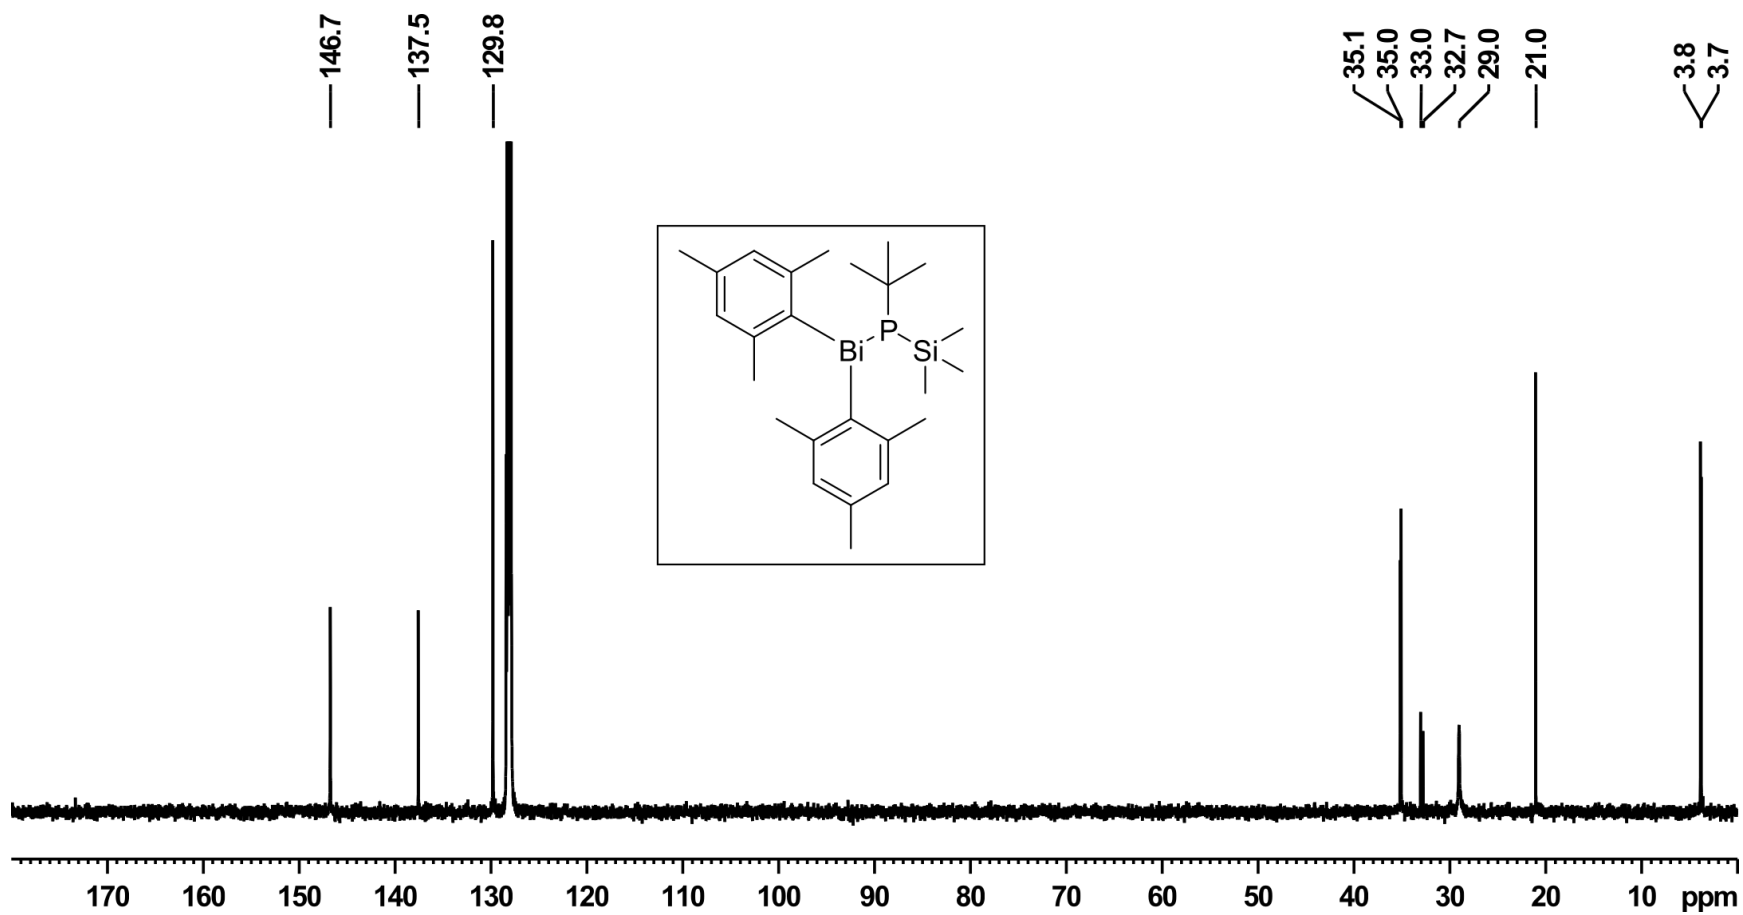

Figure S2.7.2:  $^{13}\text{C}$  NMR spectrum (125 MHz) of 7 in  $\text{C}_6\text{D}_6$  at room temperature.

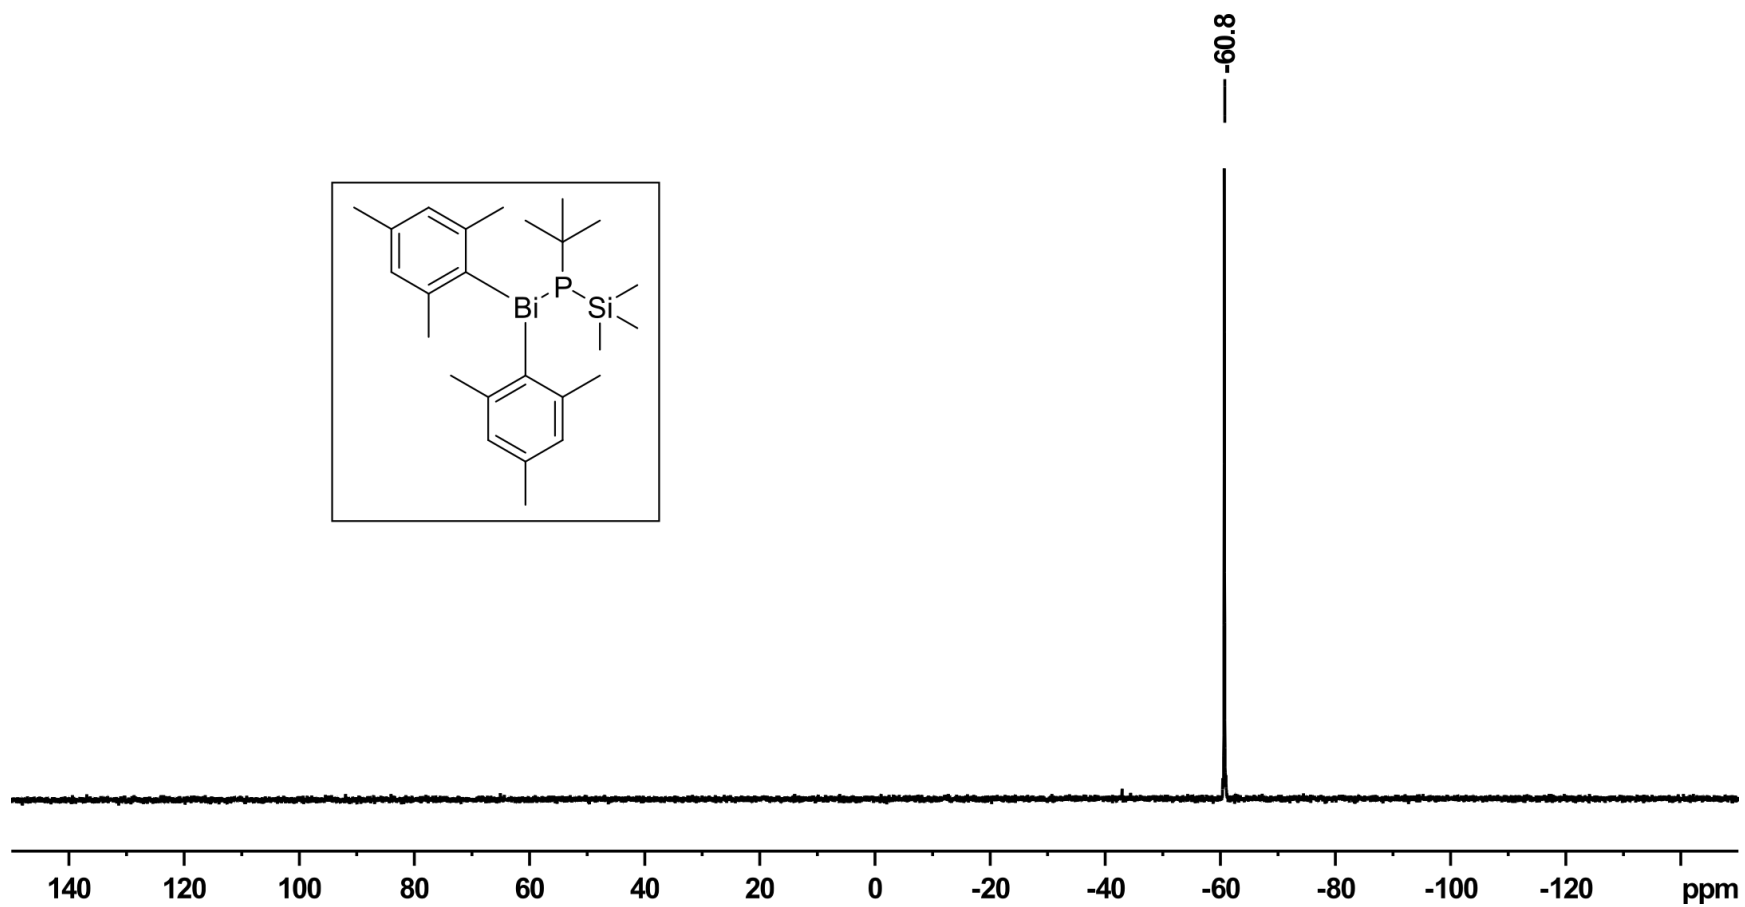

**Figure S2.7.3:**  $^{31}\text{P}$  NMR spectrum (200 MHz) of **7** in  $\text{C}_6\text{D}_6$  at room temperature.

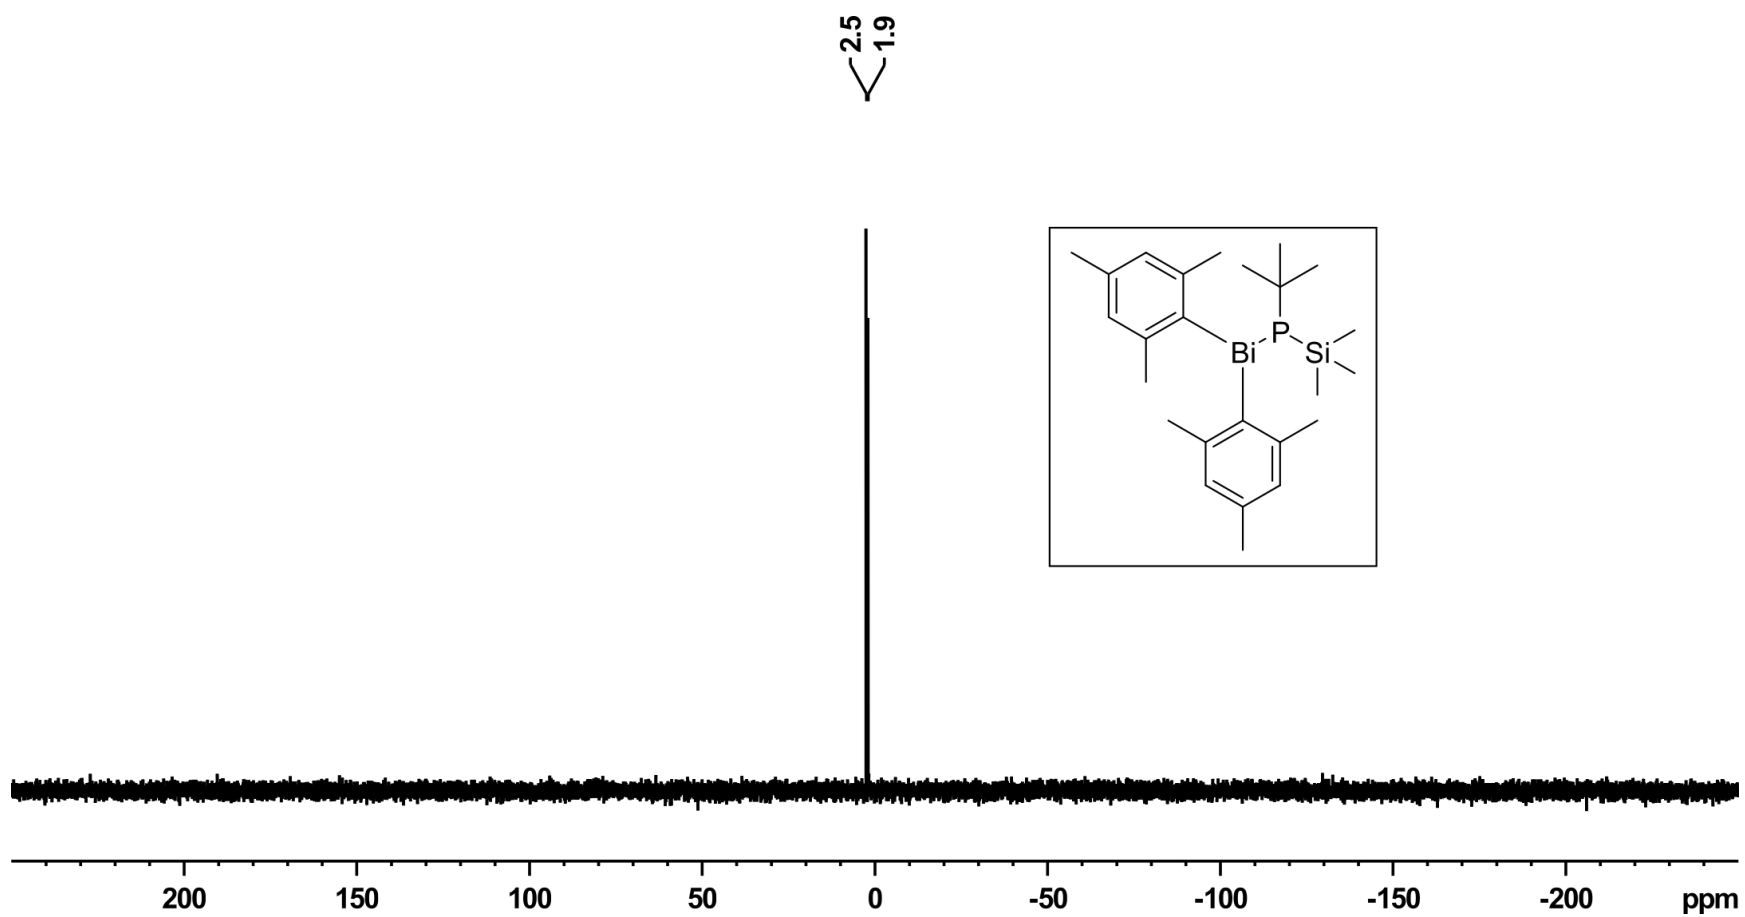

**Figure S2.7.4:**  $^{29}\text{Si}$  NMR spectrum (99 MHz) of **7** in  $\text{C}_6\text{D}_6$  at room temperature.

2.8 Ph<sub>2</sub>BiAs*t*Bu<sub>2</sub> (**8**)

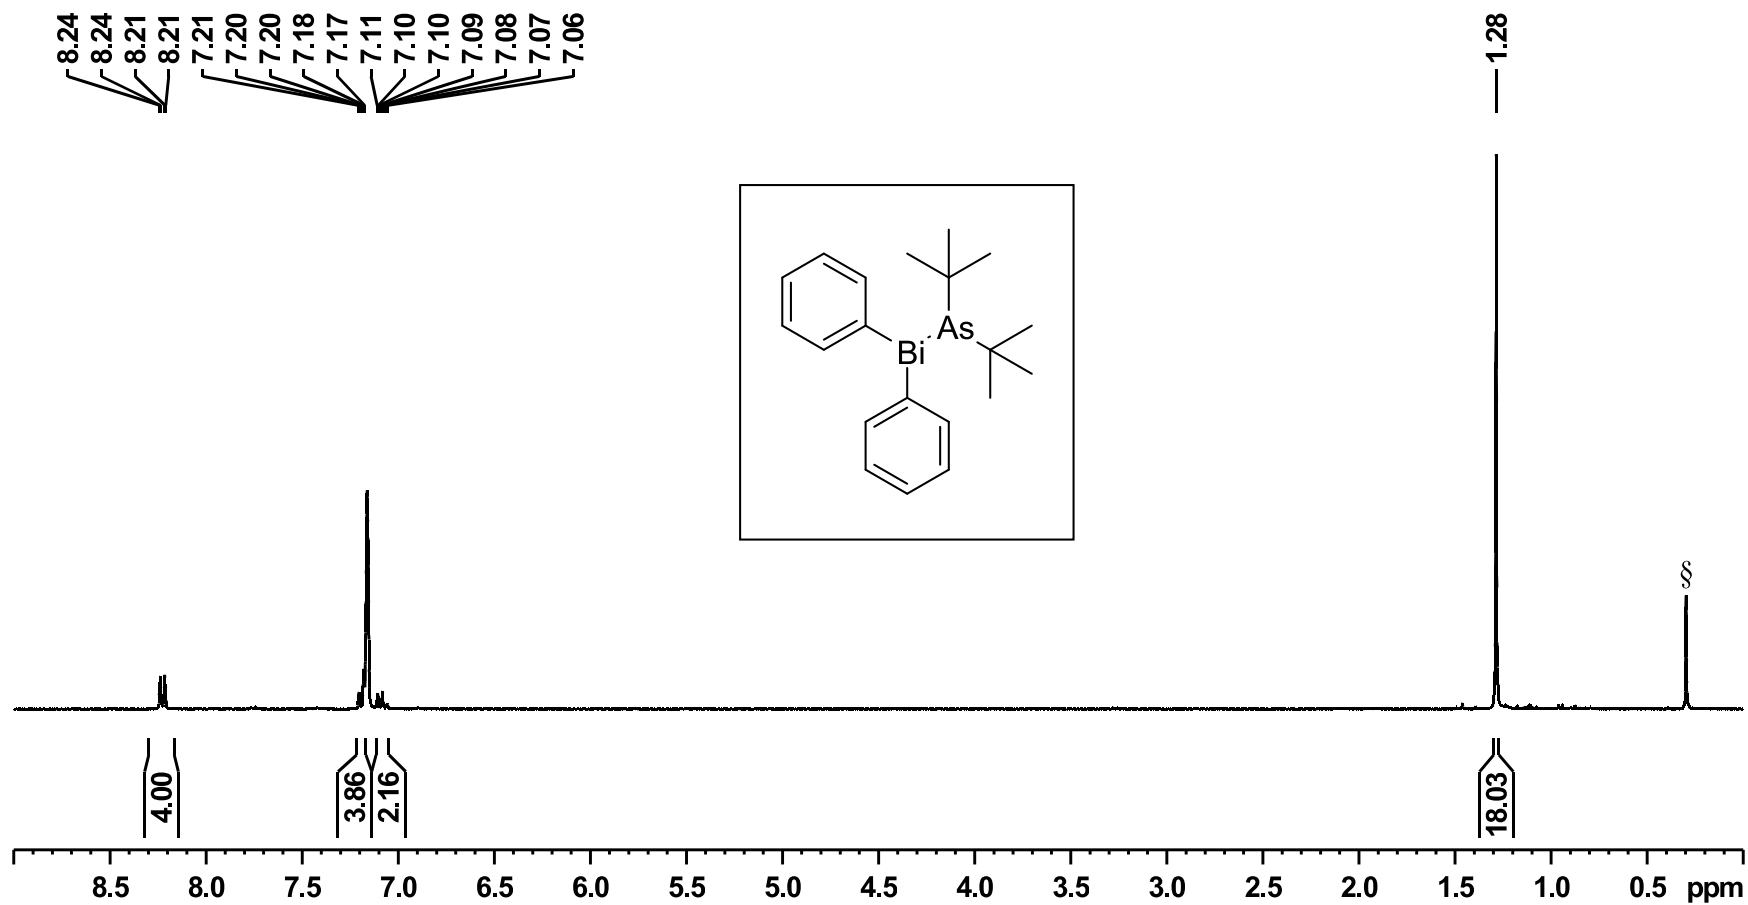

Figure S2.8.1: <sup>1</sup>H NMR spectrum (300 MHz) of **8** in C<sub>6</sub>D<sub>6</sub> at room temperature (§ = Silicon grease).

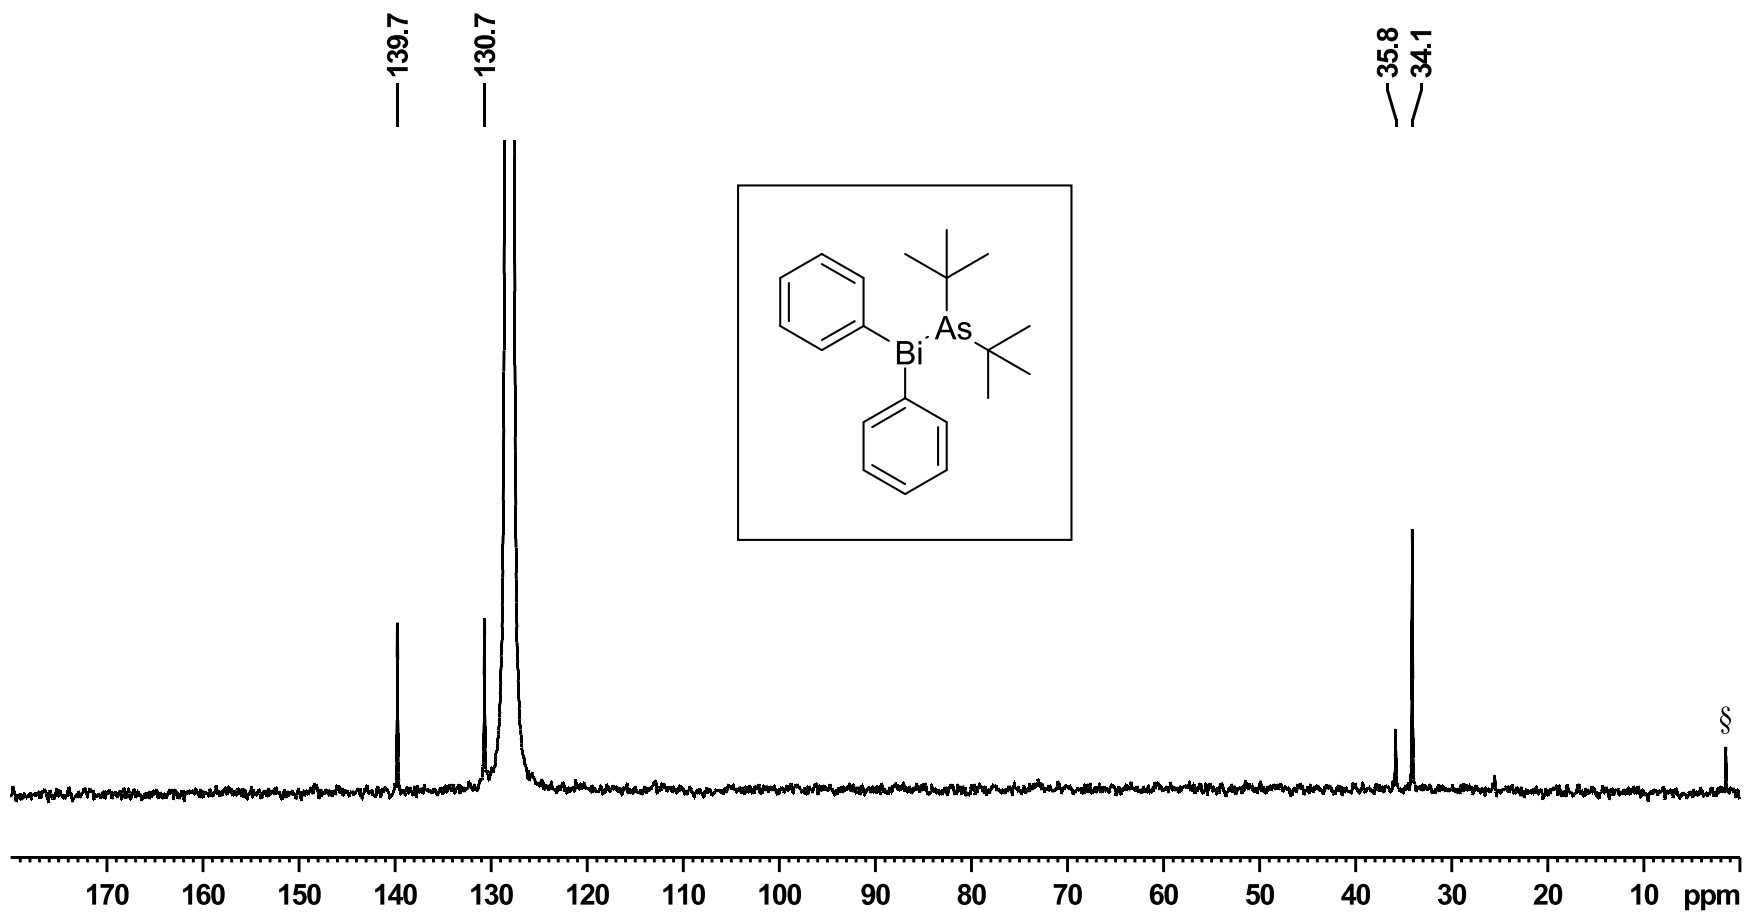

Figure S2.8.2:  $^{13}\text{C}$  NMR spectrum (75 MHz) of **8** in  $\text{C}_6\text{D}_6$  at room temperature (§ = Silicon grease).



2.9 Mes<sub>2</sub>BiAstBu<sub>2</sub> (**9**)

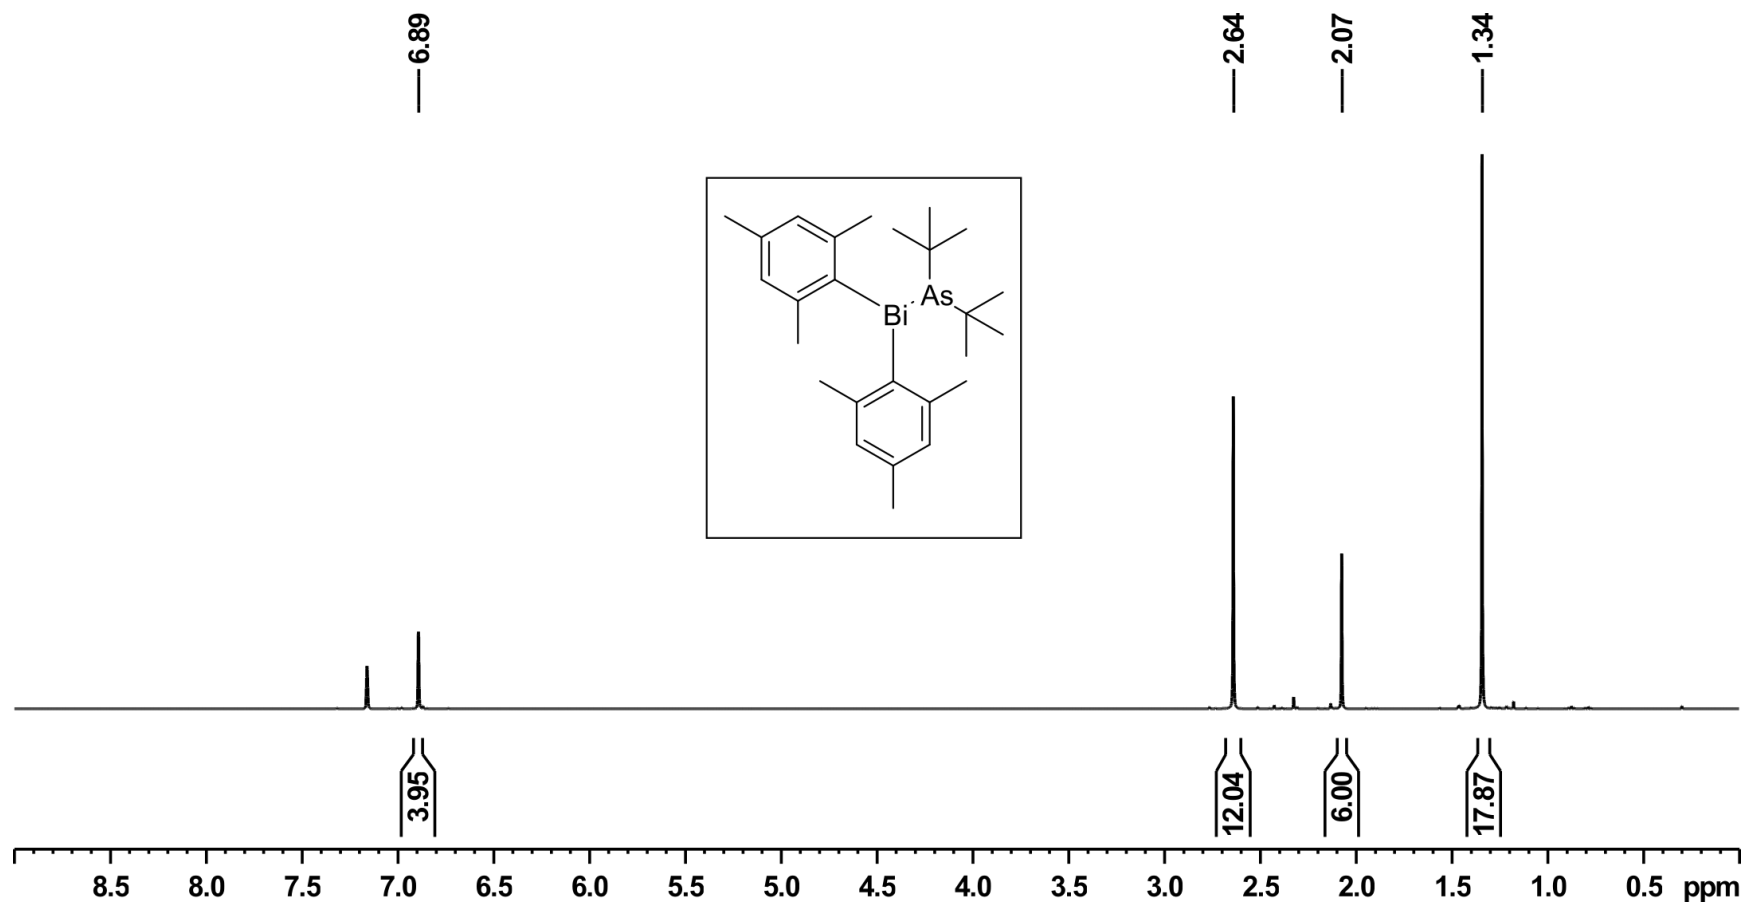

Figure S2.9.1: <sup>1</sup>H NMR spectrum (500 MHz) of **9** in C<sub>6</sub>D<sub>6</sub> at room temperature.

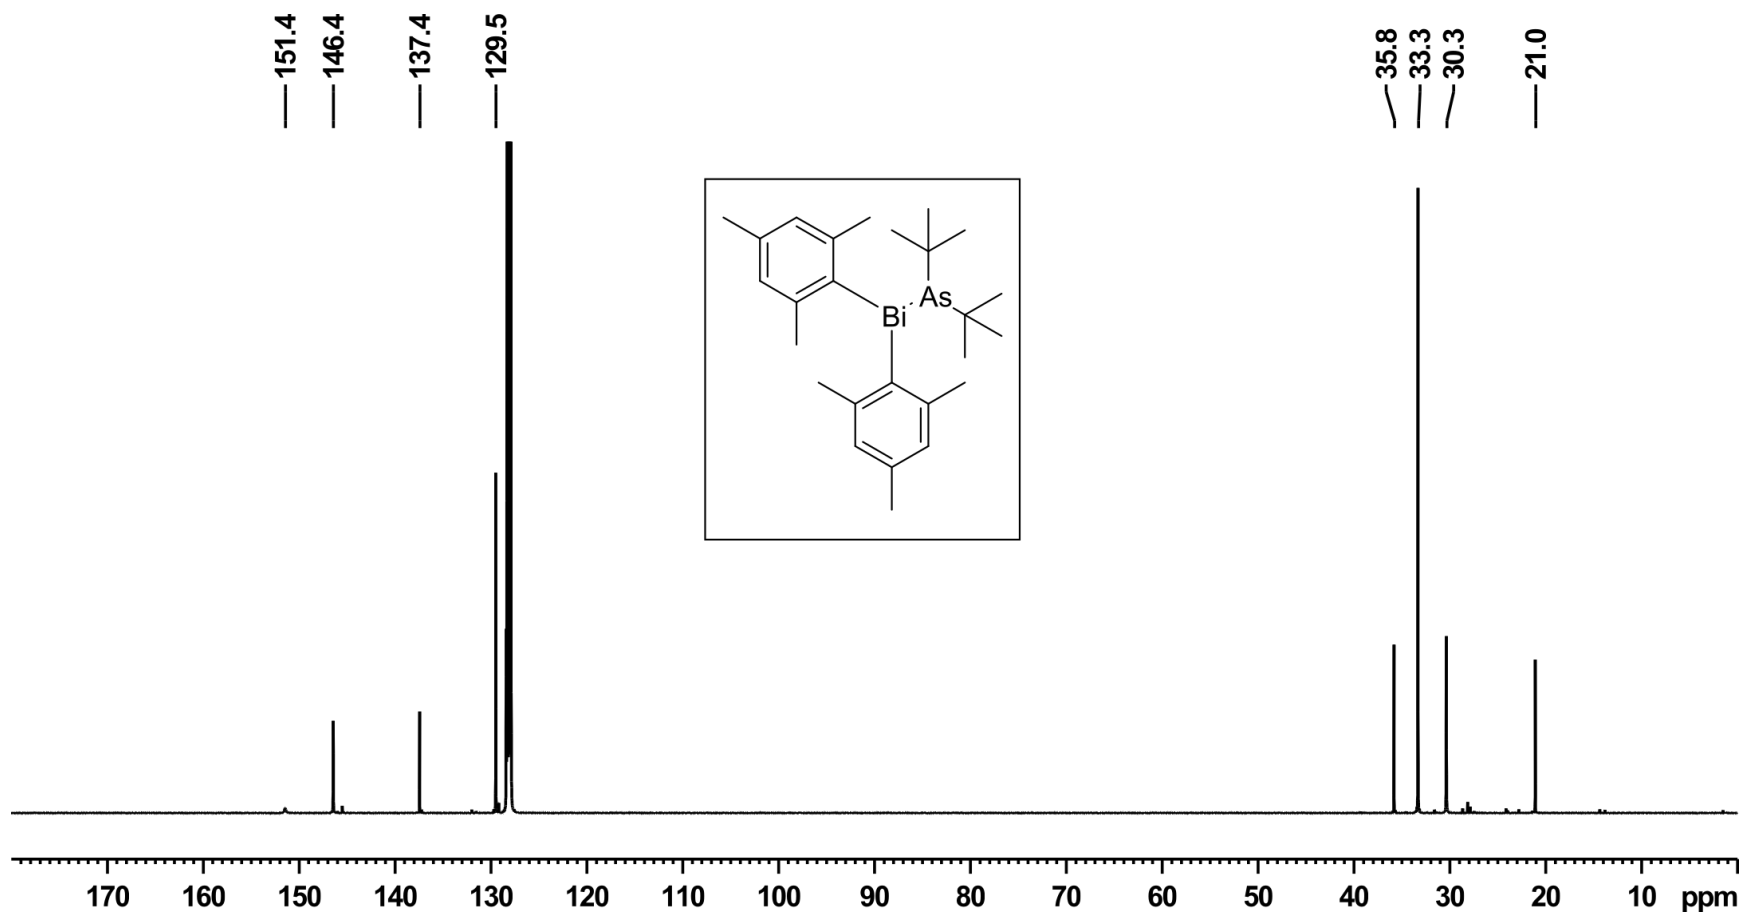

**Figure S2.8.2:**  $^{13}\text{C}$  NMR spectrum (125 MHz) of **9** in  $\text{C}_6\text{D}_6$  at room temperature.

2.10 Ph<sub>2</sub>BiAstBu(SiMe<sub>3</sub>)<sub>3</sub> (**10**)

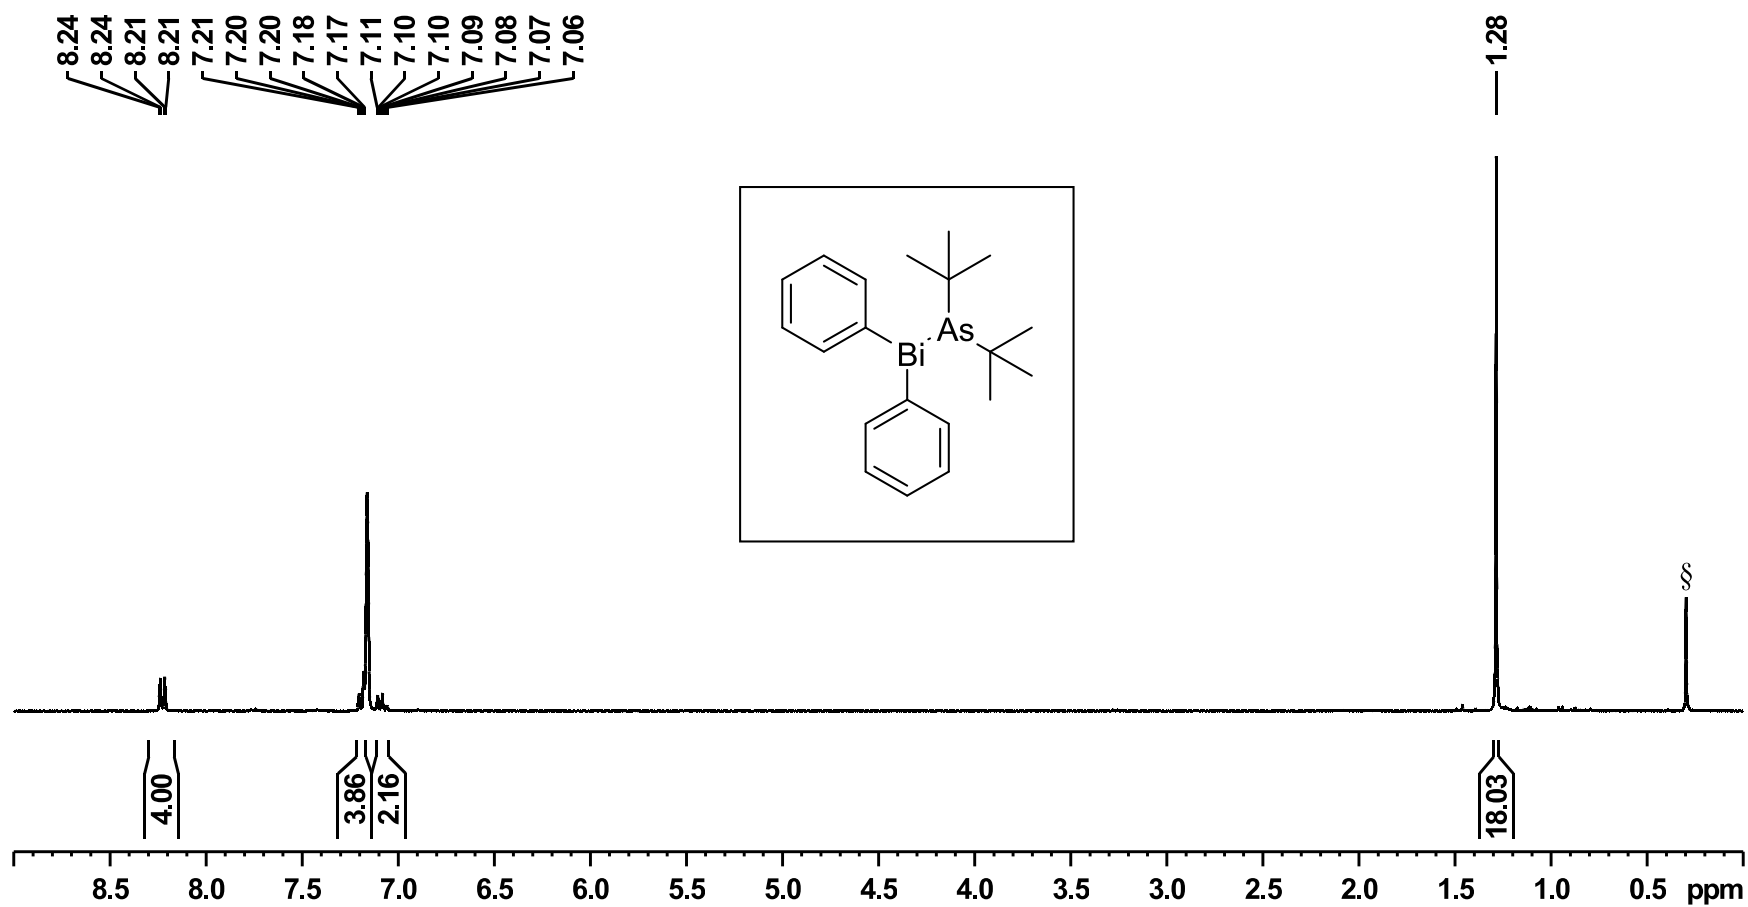

Figure S2.10.1: <sup>1</sup>H NMR spectrum (500 MHz) of **10** in C<sub>6</sub>D<sub>6</sub> at room temperature (§ = Silicon grease).

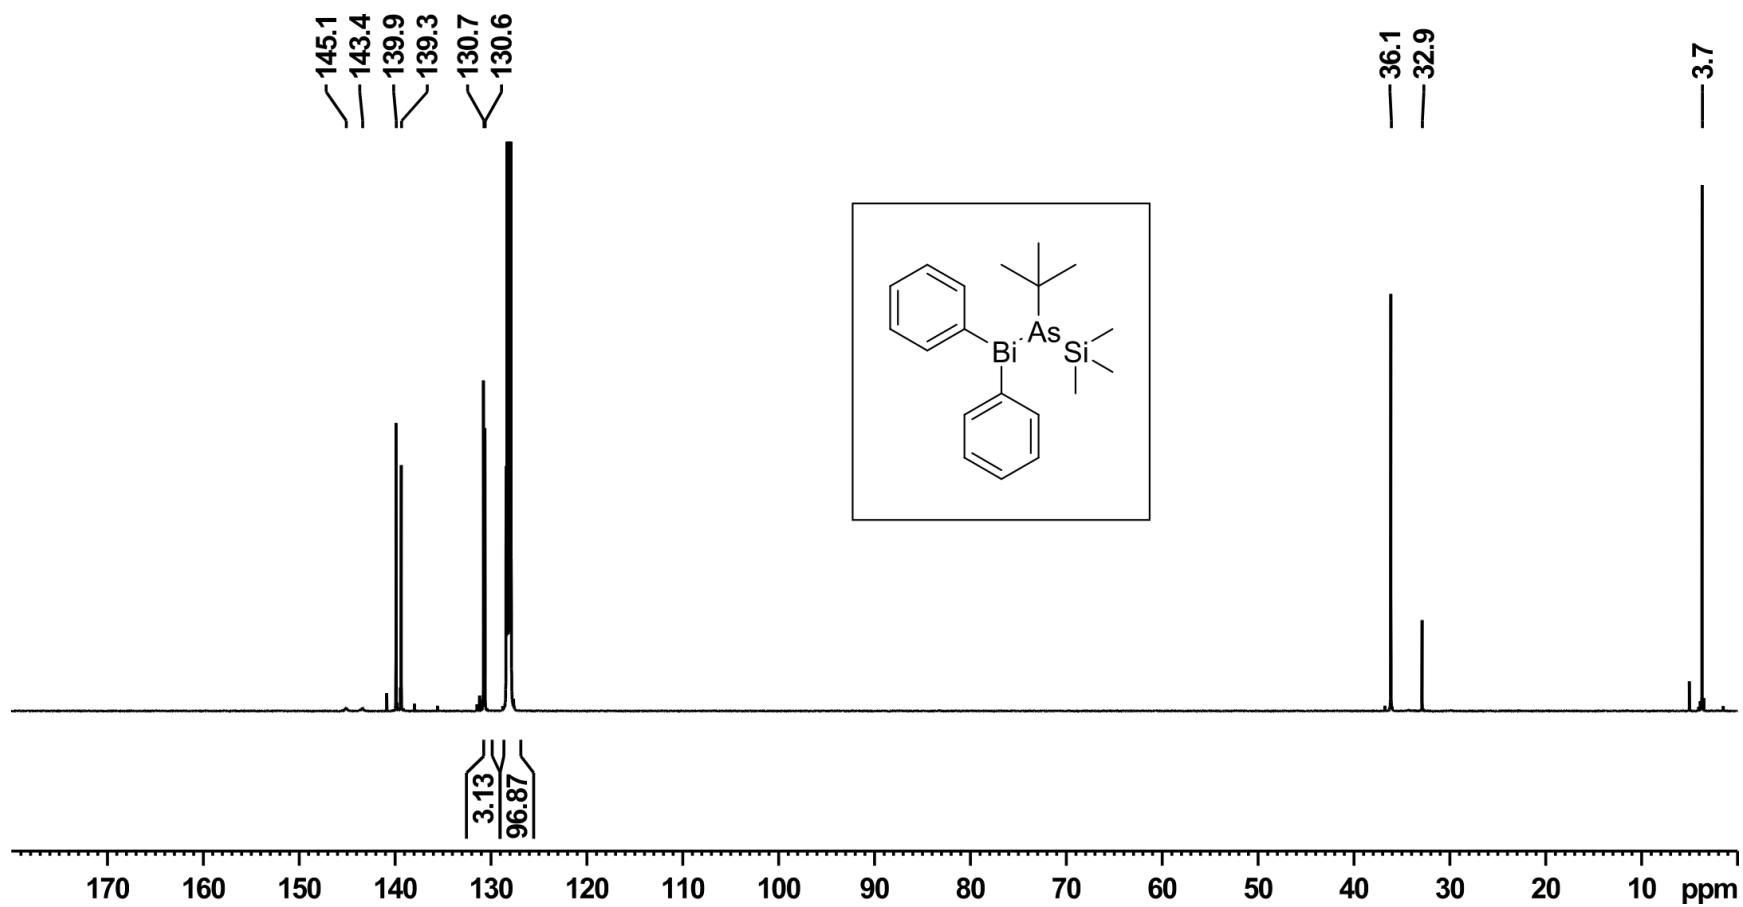

Figure S2.10.2:  $^{13}\text{C}$  NMR spectrum (125 MHz) of **10** in  $\text{C}_6\text{D}_6$  at room temperature.

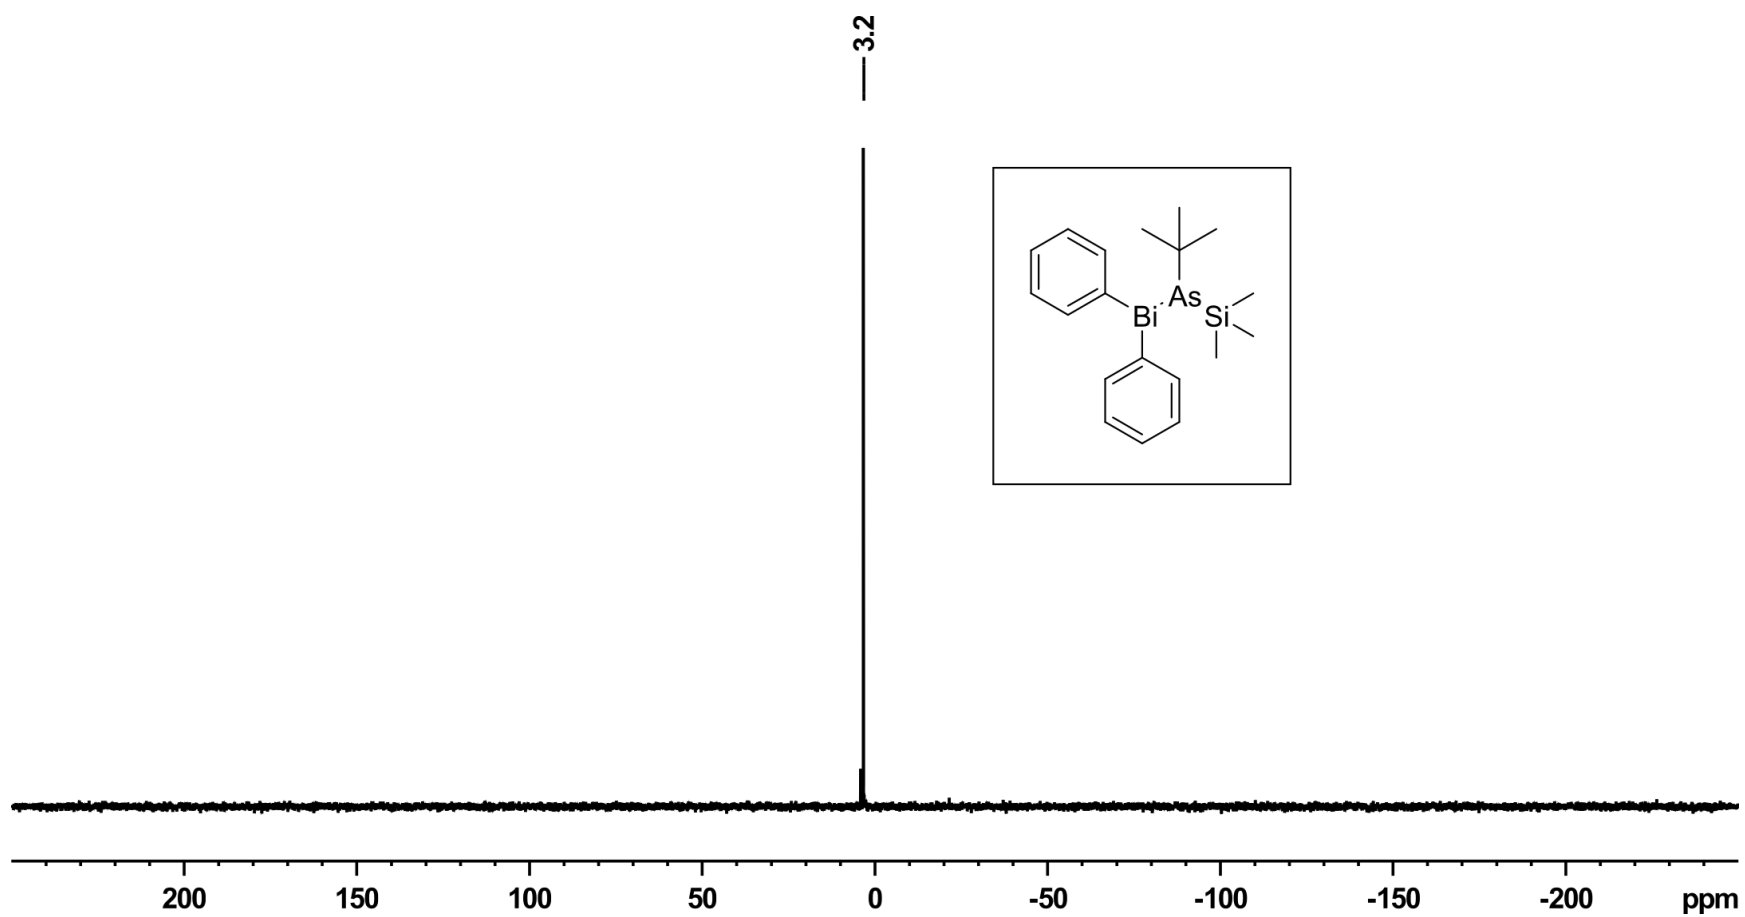

**Figure S2.10.3:**  $^{29}\text{Si}$  NMR spectrum (99 MHz) of **10** in  $\text{C}_6\text{D}_6$  at room temperature.

2.11 Mes<sub>2</sub>BiAstBu(SiMe<sub>3</sub>)<sub>3</sub> (**11**)

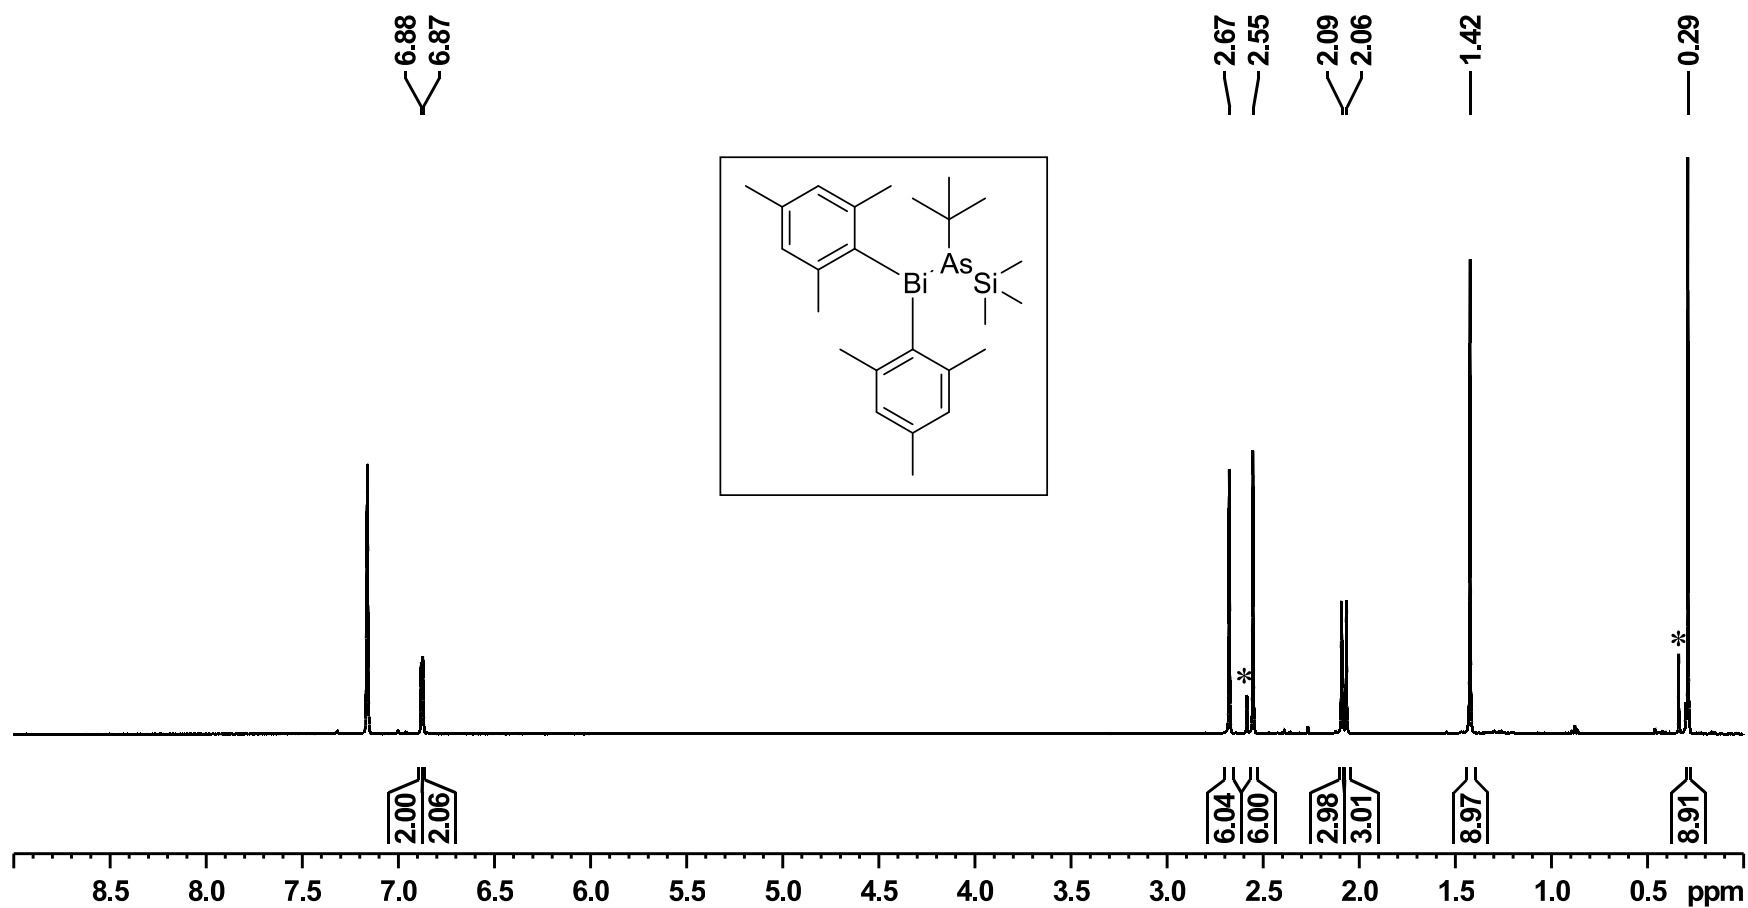

Figure S2.11.1: <sup>1</sup>H NMR spectrum (500 MHz) of **11** in C<sub>6</sub>D<sub>6</sub> at room temperature (\* = Unknown impurity).

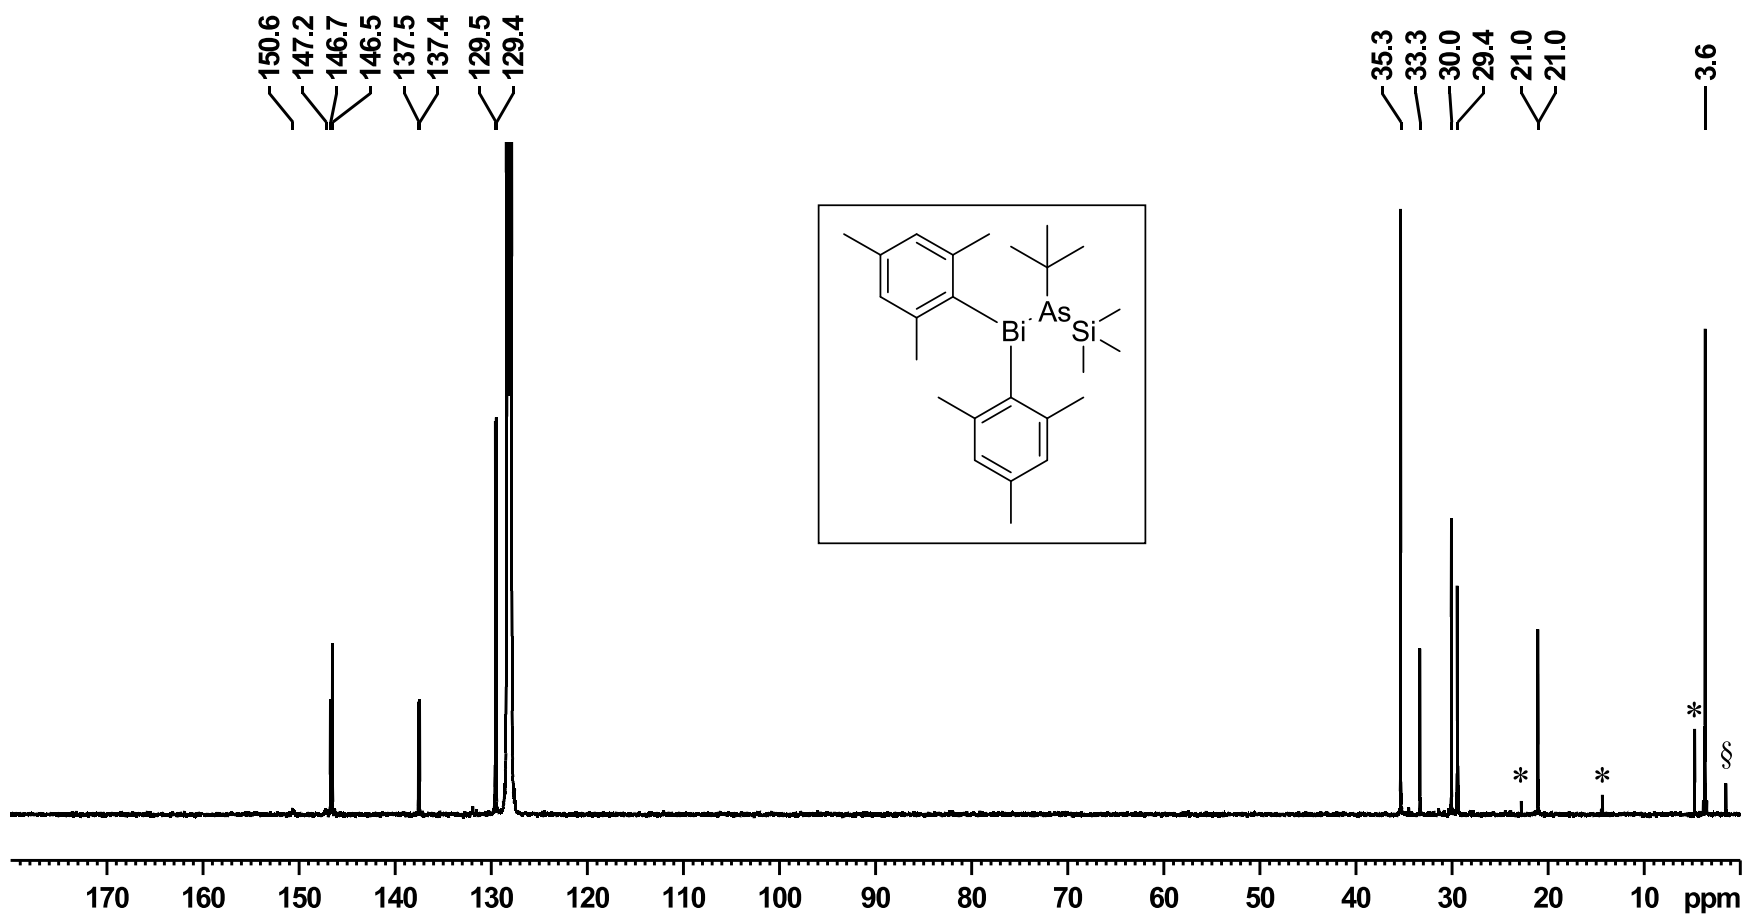

**Figure S2.11.2:**  $^{13}\text{C}$  NMR spectrum (125 MHz) of **11** in  $\text{C}_6\text{D}_6$  at room temperature (\* = Unknown impurity, § = Silicon grease).

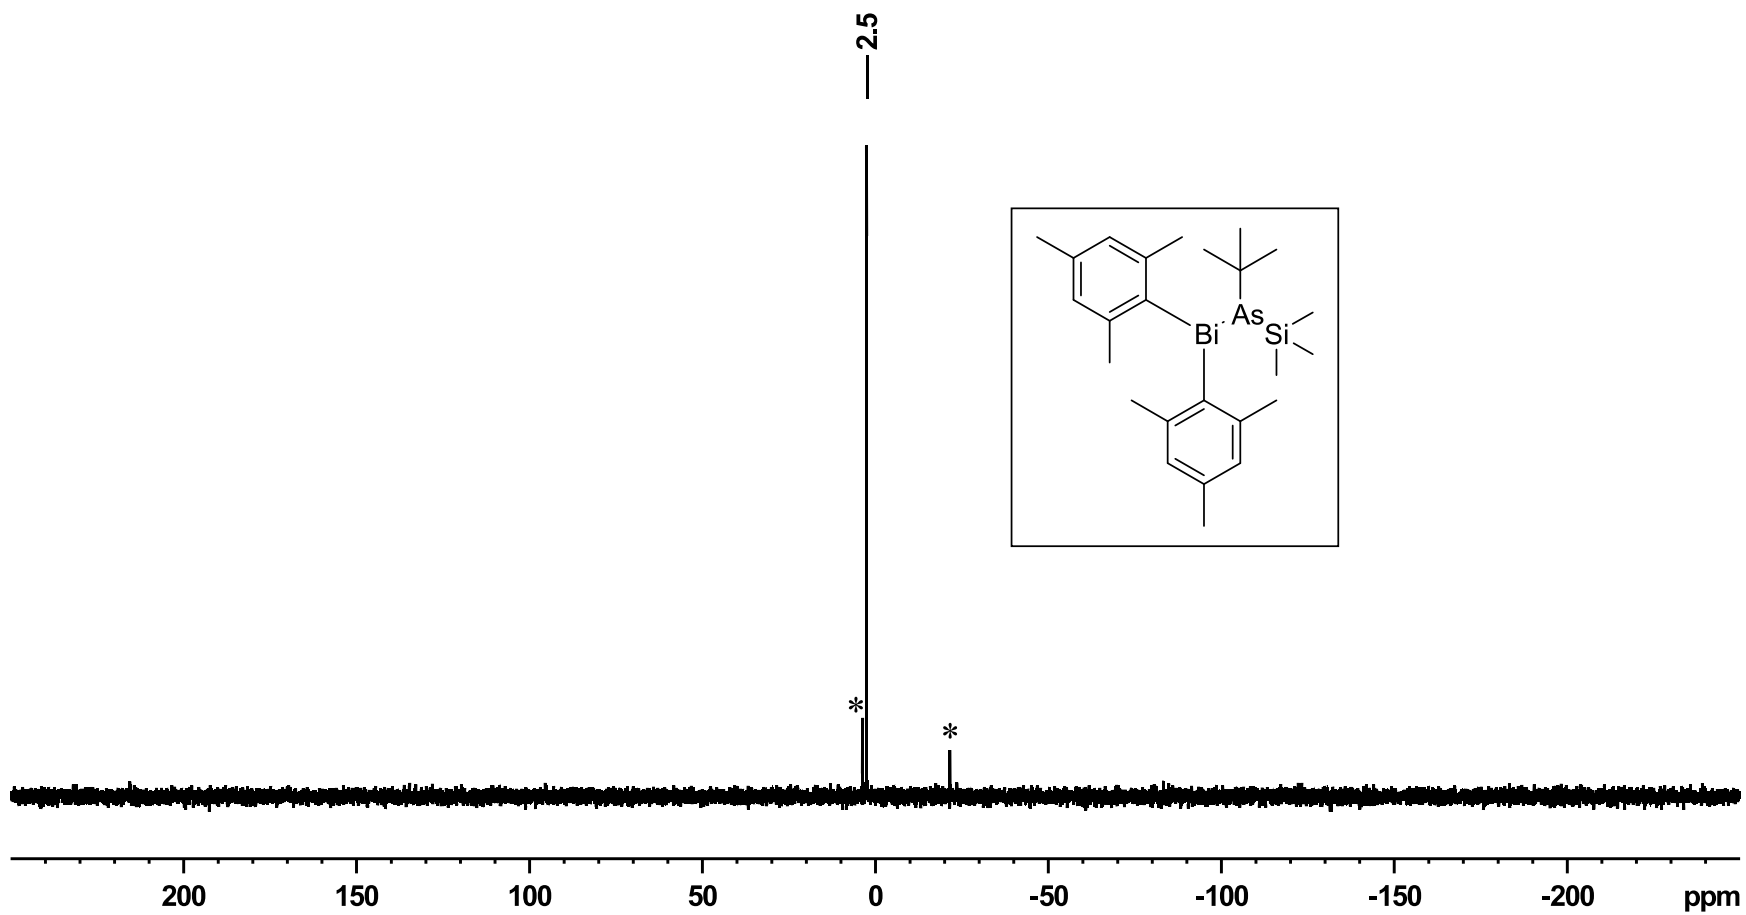

**Figure S2.11.1:**  $^{29}\text{Si}$  NMR spectrum (99 MHz) of **11** in  $\text{C}_6\text{D}_6$  at room temperature (\* = Unknown impurity).



2.12 Ph<sub>2</sub>BiSbMes<sub>2</sub> (**12**)

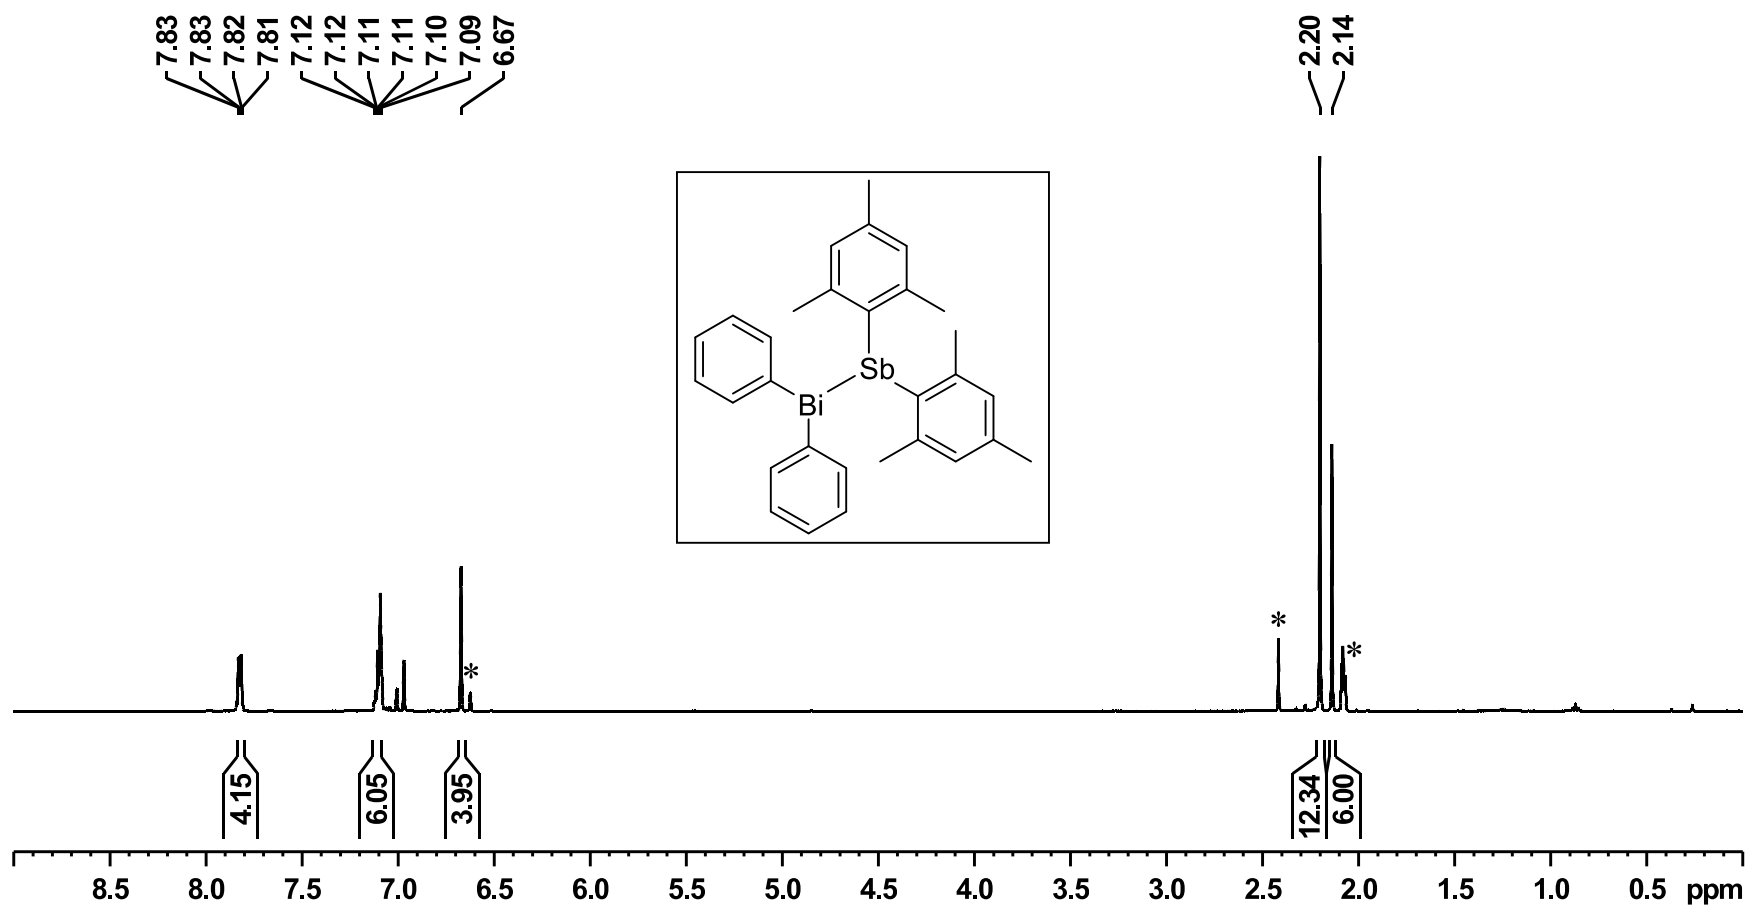

Figure S2.12.1: <sup>1</sup>H NMR spectrum (500 MHz) of **12** in toluene-d<sub>8</sub> at room temperature (\* = Mes<sub>4</sub>Sb<sub>2</sub>).

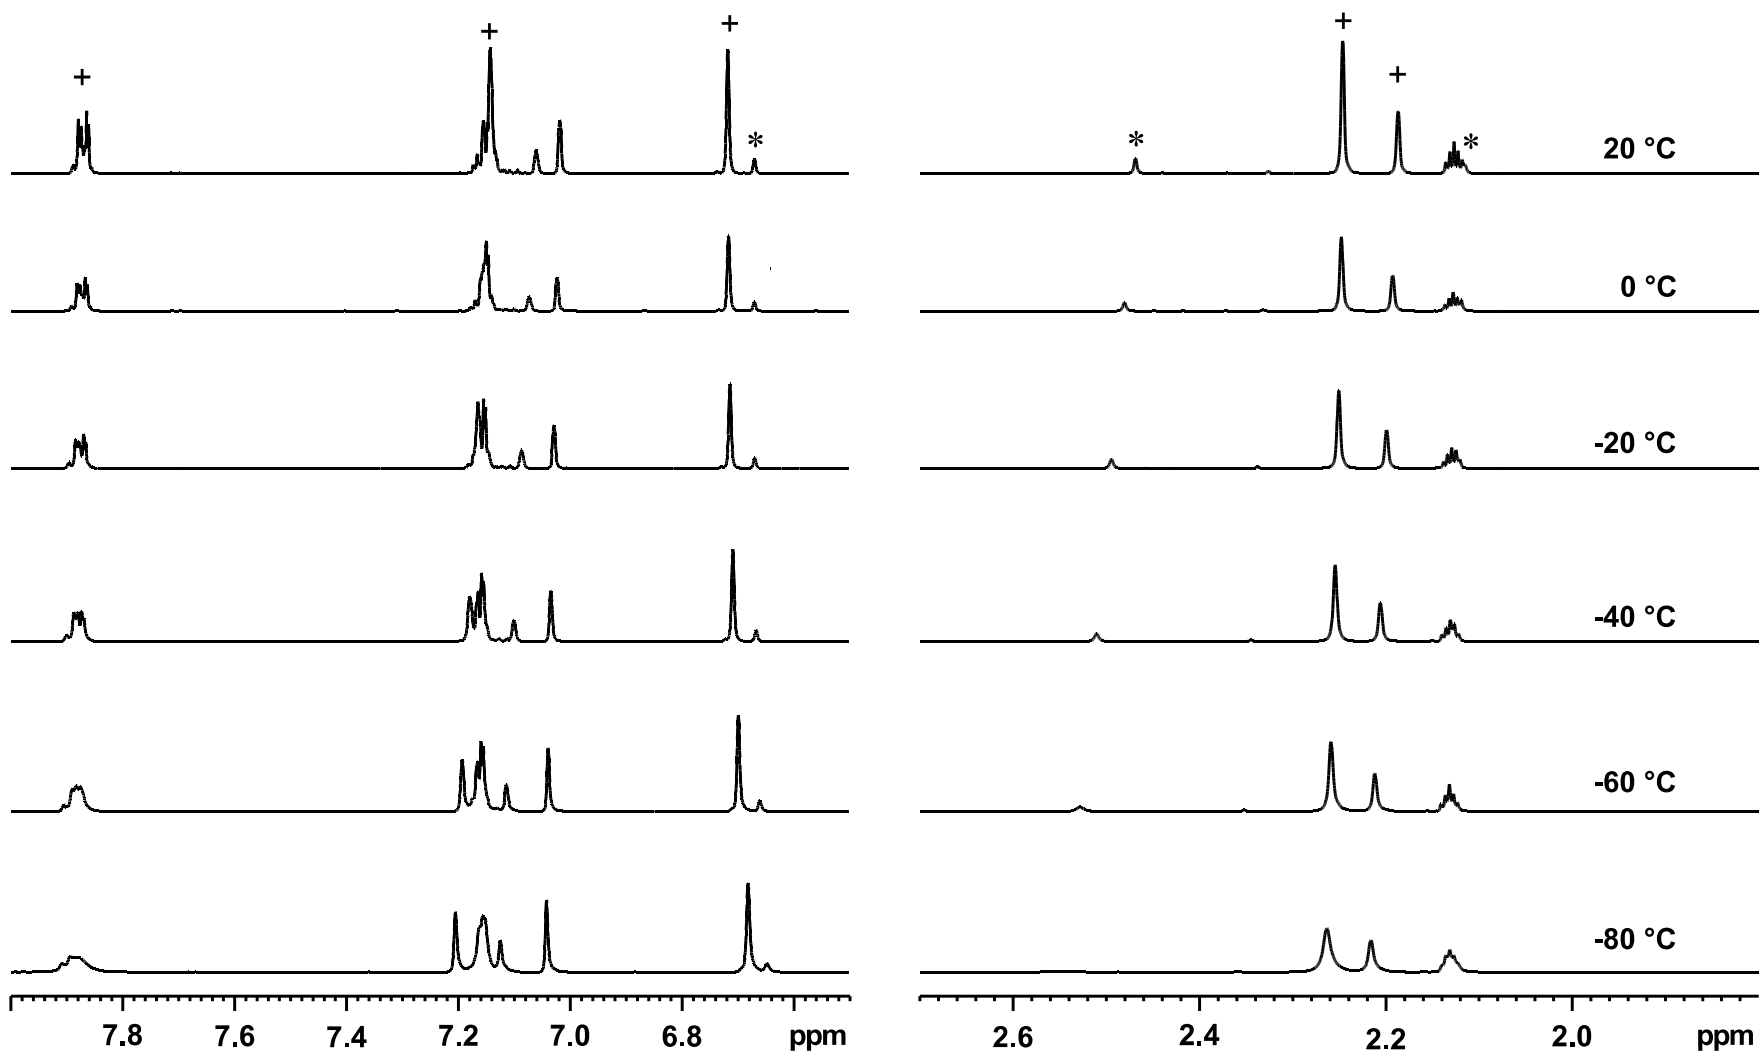

**Figure S2.12.2:** Excerpts of the temperature dependent  $^1\text{H}$  NMR spectra (500 MHz) of **12** in toluene- $\text{d}_8$  (+ = **12**, \* =  $\text{Mes}_4\text{Sb}_2$ ).

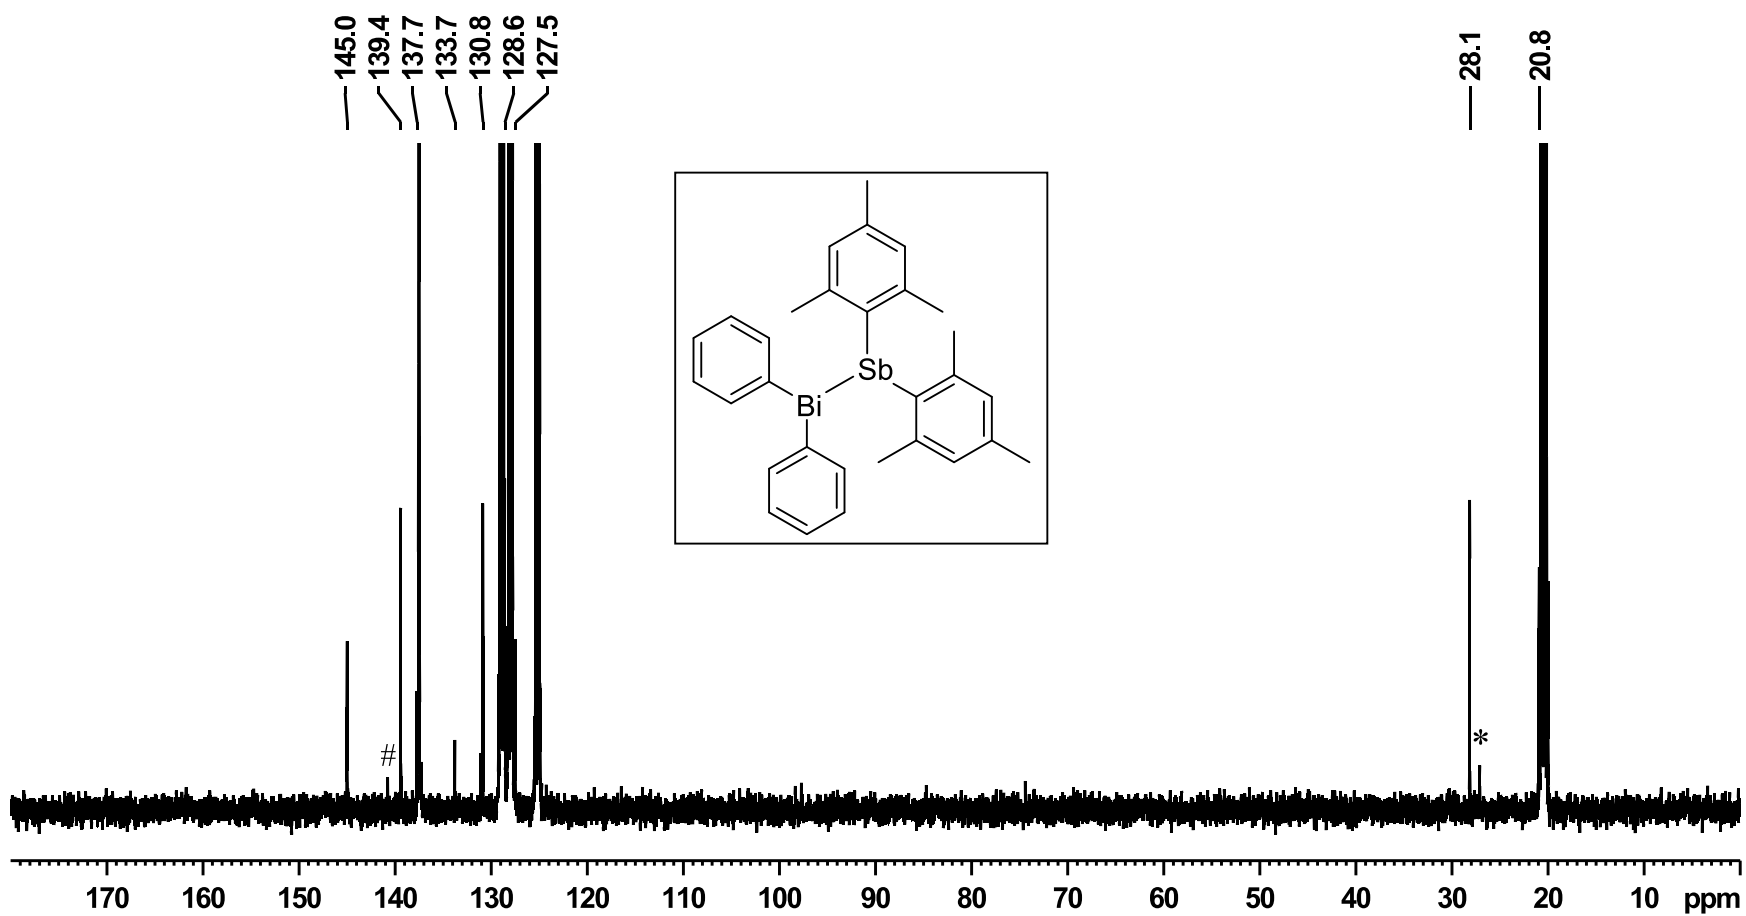

Figure S2.12.3:  $^{13}\text{C}$  NMR spectrum (125 MHz) of **12** in toluene- $d_8$  at room temperature (\* =  $\text{Mes}_4\text{Sb}_2$ , # =  $\text{Ph}_4\text{Bi}_2$ ).

2.12 Mes<sub>2</sub>BiSbMes<sub>2</sub> (**13**)

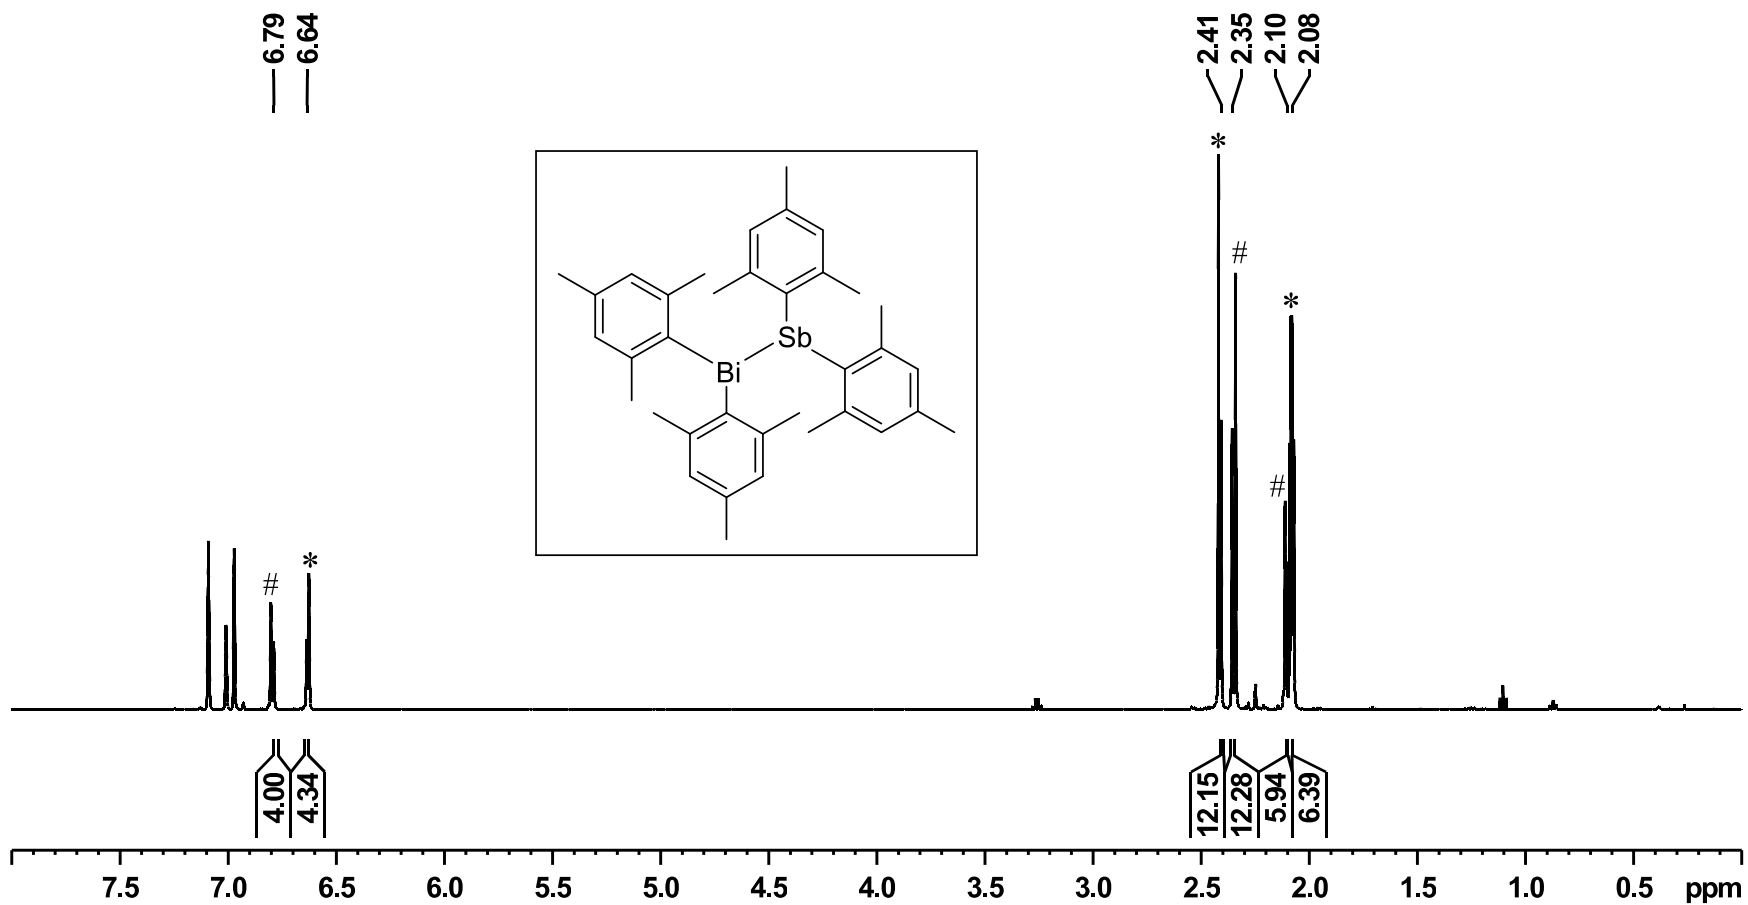

Figure S2.13.1: <sup>1</sup>H NMR spectrum (500 MHz) of **13** in toluene-d<sub>8</sub> at room temperature (\* = Mes<sub>4</sub>Sb<sub>2</sub>, # = Mes<sub>4</sub>Bi<sub>2</sub>).

<

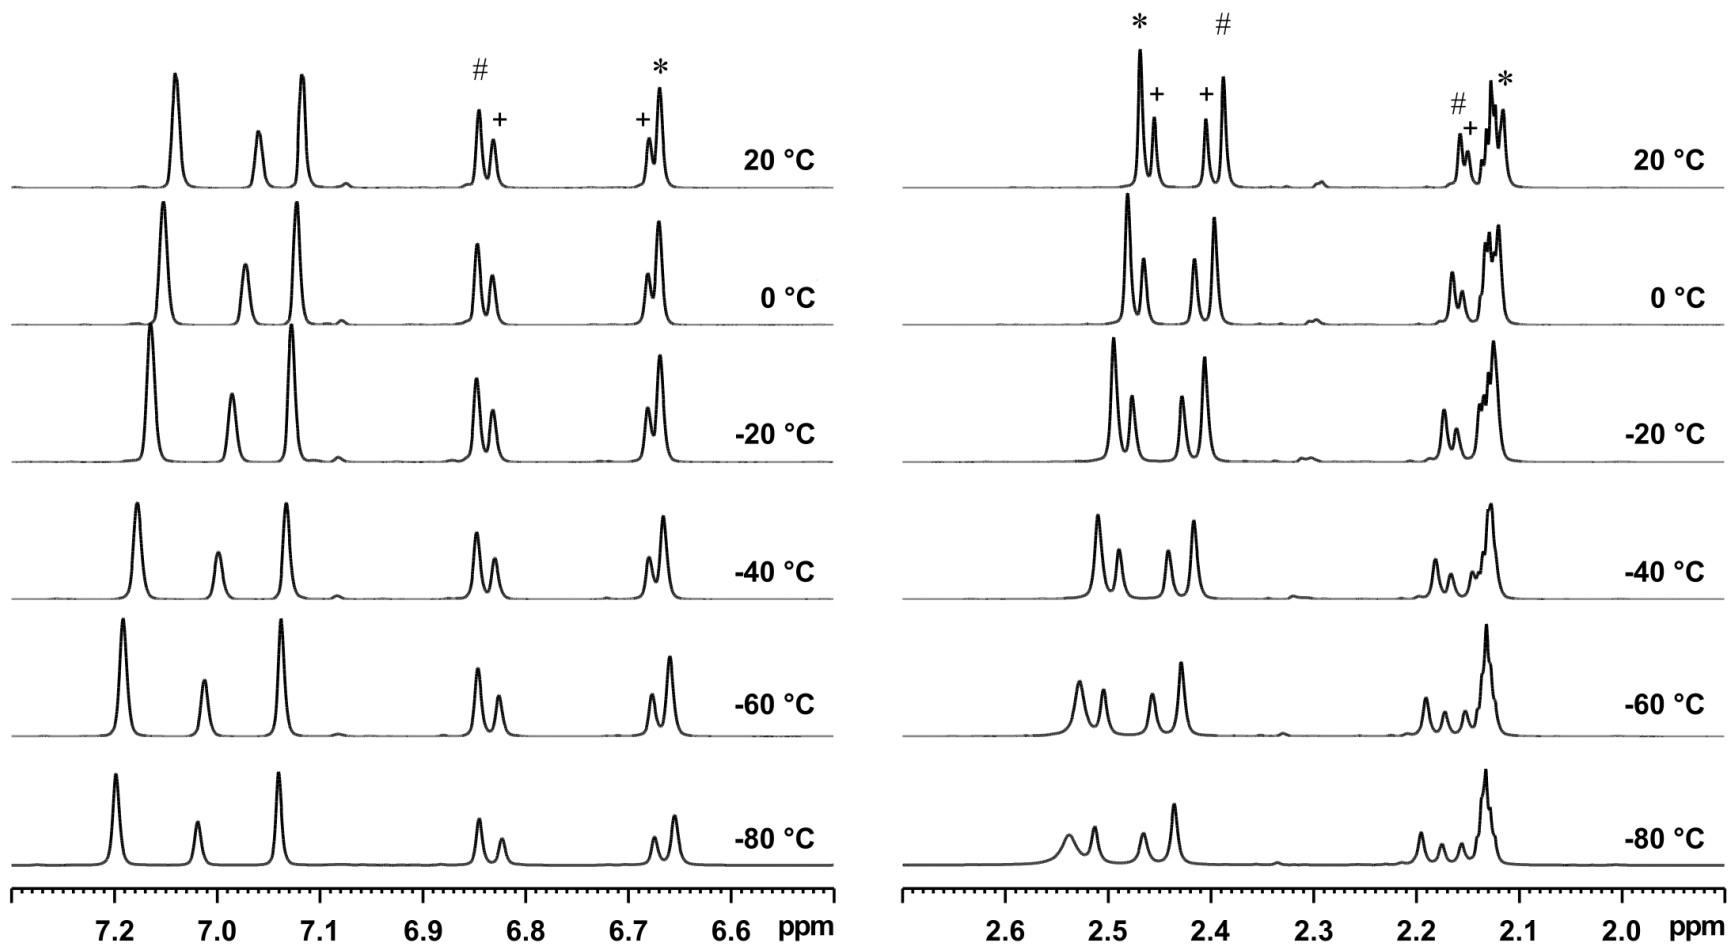

**Figure S2.13.2:** Excerpts of the temperature dependent <sup>1</sup>H NMR spectra (500 MHz) of **13** in toluene-d<sub>8</sub> at room temperature (+ = **13**,

\* = Mes<sub>4</sub>Sb<sub>2</sub>, # = Mes<sub>4</sub>Bi<sub>2</sub>).

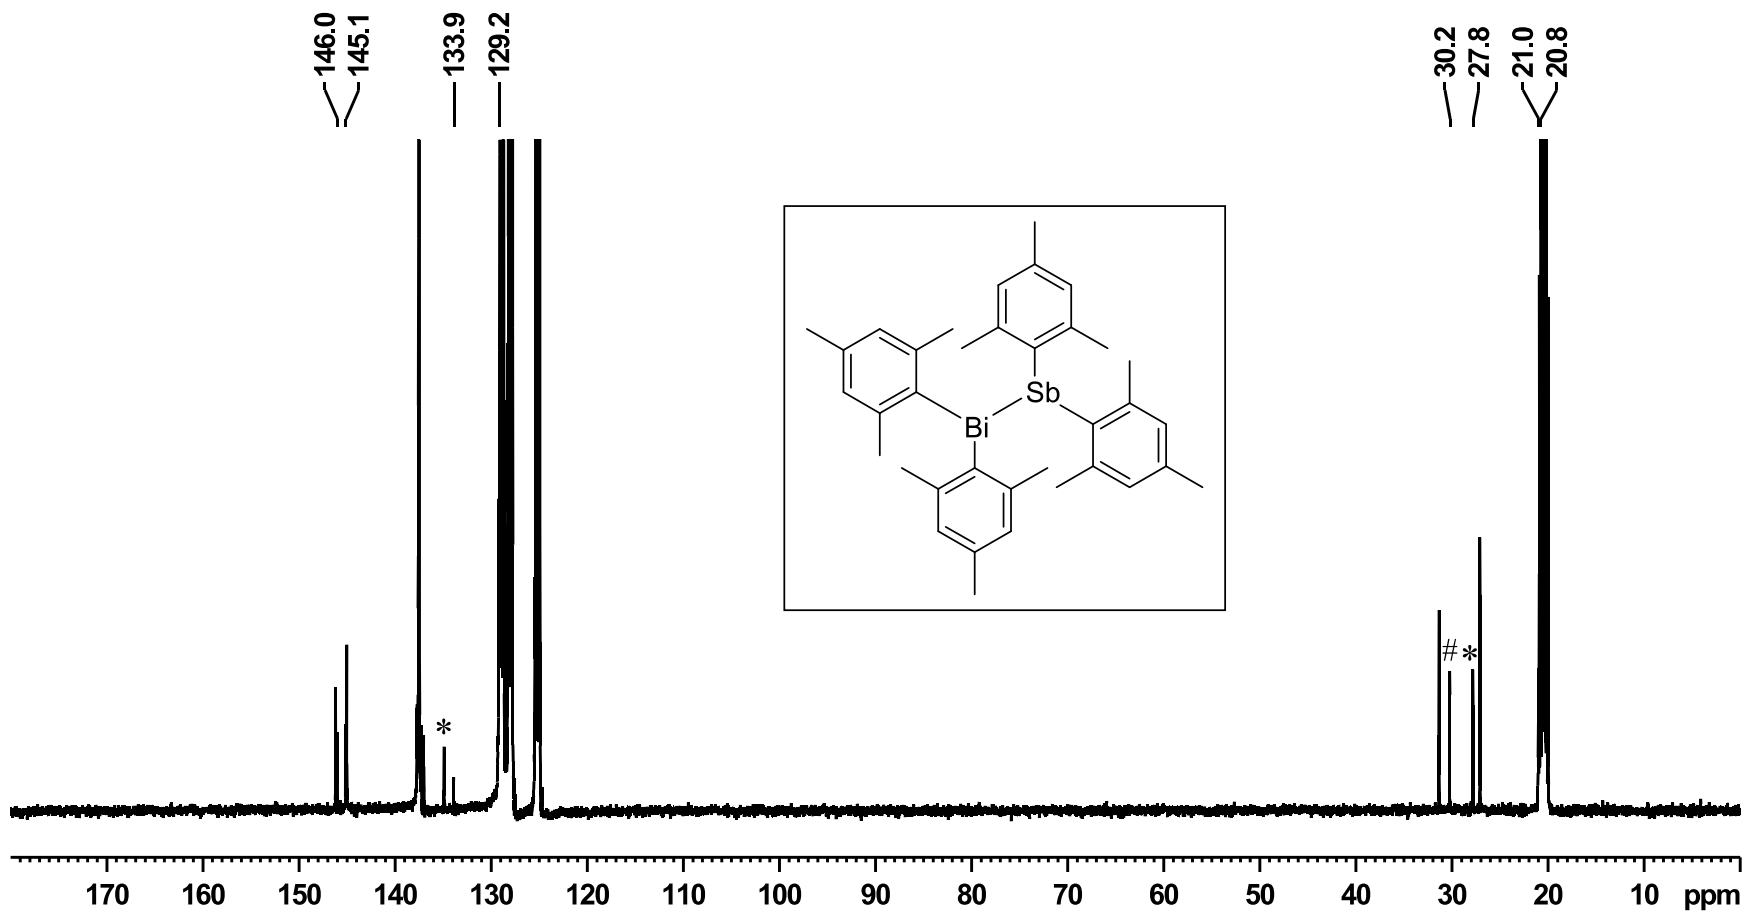

**Figure S2.13.3:**  $^{13}\text{C}$  NMR spectrum (125 MHz) of **13** in toluene- $d_8$  at room temperature (\* =  $\text{Mes}_4\text{Sb}_2$ , # =  $\text{Mes}_4\text{Bi}_2$ ).

### 3. Calculation of $\Delta H_r^0$ , $\Delta S_r^0$ and $\Delta G_r$ (20 °C) for the equilibria of **12** and **13**

**Table S1.** Equilibrium constants for the dismutation of **12** and **13** two Mes<sub>4</sub>Sb<sub>2</sub> and the corresponding disbimuthine at different temperatures. Equilibrium constants were obtained *via* integration of NMR signals using the *dcon* implementation in *TopSpin 4.0.7*.

| T (K <sup>-1</sup> ) | T <sup>-1</sup> (K <sup>-1</sup> ) | <b>12</b> |             | <b>13</b> |             |
|----------------------|------------------------------------|-----------|-------------|-----------|-------------|
|                      |                                    | <i>K</i>  | ln <i>K</i> | <i>K</i>  | ln <i>K</i> |
| 193                  | 0.00518                            | 64.811    | 4.1285      | 1.154     | 0,1291      |
| 213                  | 0.00469                            | 64.811    | 4.1715      | 1.154     | 0,1432      |
| 233                  | 0.00429                            | 68.117    | 4.2212      | 1.077     | 0,0744      |
| 253                  | 0.00395                            | 67.864    | 4.2175      | 1.039     | 0,0386      |
| 273                  | 0.00366                            | 72.382    | 4.2820      | 0.987     | -0,0132     |
| 293                  | 0.00341                            | 76.357    | 4.3354      | 1.049     | 0,0476      |

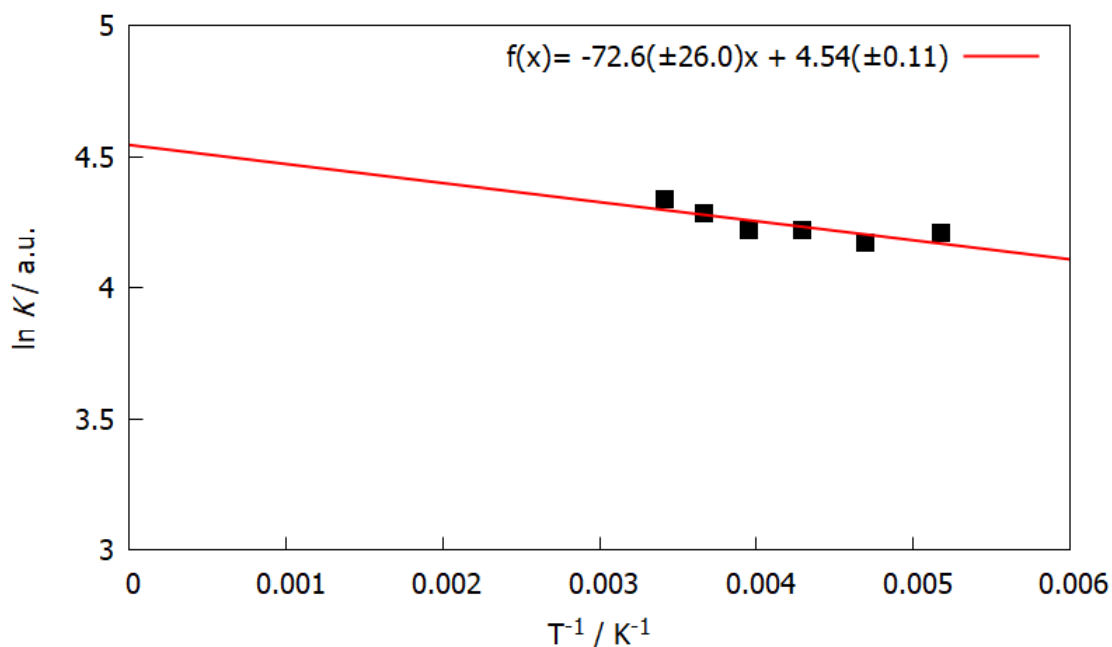

**Figure S3.1:** *van't Hoff* plot of the natural logarithmic of the equilibrium constant in the equilibrium of **12** and Mes<sub>4</sub>Sb<sub>2</sub> and Ph<sub>4</sub>Bi<sub>2</sub> against the reciprocal temperature with a fitted linear regression  $f(x)$ .

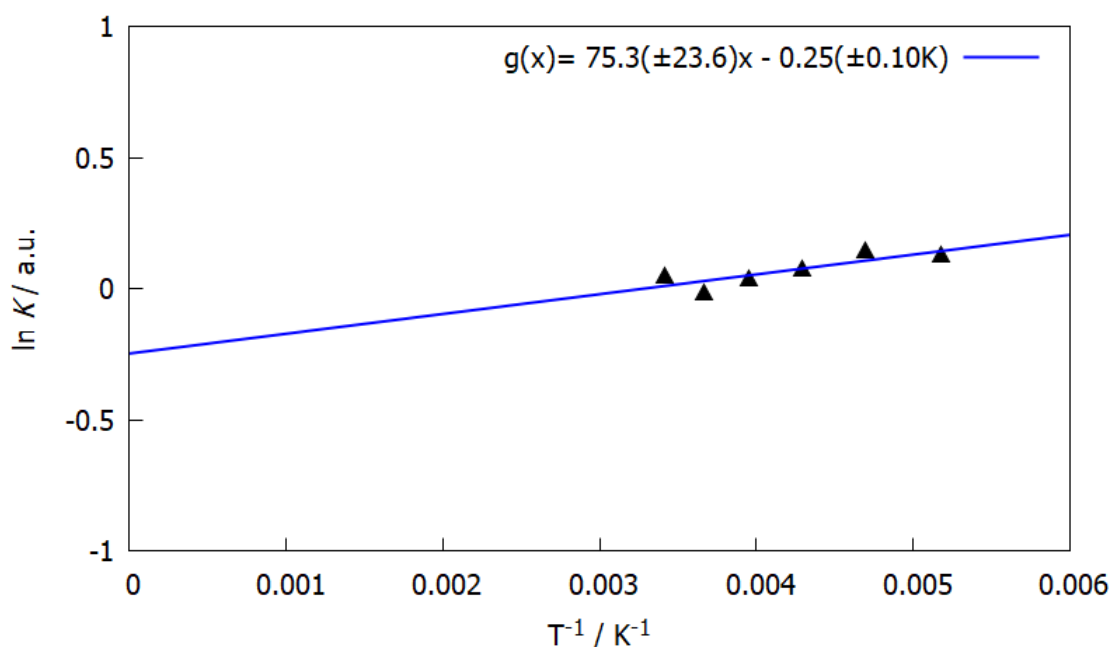

**Figure S3.2:** *van't Hoff* plot of the natural logarithmic of the equilibrium constant in the equilibrium of **13** and  $\text{Mes}_4\text{Sb}_2$  and  $\text{Mes}_4\text{Bi}_2$  against the reciprocal temperature with a fitted linear regression  $g(x)$ .

Calculation of reaction entropy, reaction enthalpy and free reaction energy at 20 °C:

**12:**

$$\Delta H_r^\theta = 72.6 \text{ K} \cdot 8.314 \text{ J} \cdot \text{mol}^{-1} \text{K}^{-1} = 603 \text{ J} \cdot \text{mol}^{-1} = 0.603 \text{ KJ} \cdot \text{mol}^{-1}$$

$$\Delta(\Delta H_r^\theta) = \pm 26.0 \text{ K} \cdot 8.314 \text{ J} \cdot \text{mol}^{-1} \text{K}^{-1} = 216 \text{ J} \cdot \text{mol}^{-1} = \pm 0.216 \text{ KJ} \cdot \text{mol}^{-1}$$

$$\Delta S_r^\theta = 4.54 \cdot 8.314 \text{ J} \cdot \text{mol}^{-1} \text{K}^{-1} = 37.78 \text{ J} \cdot \text{mol}^{-1} \text{K}^{-1}$$

$$\Delta(\Delta S_r^\theta) = \pm 0.11 \text{ K} \cdot 8.314 \text{ J} \cdot \text{mol}^{-1} \text{K}^{-1} = \pm 0.92 \text{ J} \cdot \text{mol}^{-1} \text{K}^{-1}$$

$$\Delta G_r(20 \text{ }^\circ\text{C}) = 603 \text{ J} \cdot \text{mol}^{-1} - 293 \text{ K} \cdot 37.78 \text{ J} \cdot \text{mol}^{-1} \text{K}^{-1} = -10.47 \text{ KJ} \cdot \text{mol}^{-1}$$

$$\Delta(\Delta G_r(20 \text{ }^\circ\text{C})) = \pm 216 \text{ J} \cdot \text{mol}^{-1} - 293 \text{ K} \cdot 0.92 \text{ J} \cdot \text{mol}^{-1} \text{K}^{-1} = \pm 0.05 \text{ KJ} \cdot \text{mol}^{-1}$$

**13:**

$$\Delta H_r^\theta = -75.3 \text{ K} \cdot 8.314 \text{ J} \cdot \text{mol}^{-1} \text{K}^{-1} = -626 \text{ J} \cdot \text{mol}^{-1} = -0.626 \text{ KJ} \cdot \text{mol}^{-1}$$

$$\Delta(\Delta H_r^\theta) = \pm 23.6 \text{ K} \cdot 8.314 \text{ J} \cdot \text{mol}^{-1} \text{K}^{-1} = 196 \text{ J} \cdot \text{mol}^{-1} = \pm 0.196 \text{ KJ} \cdot \text{mol}^{-1}$$

$$\Delta S_r^\theta = -0.25 \cdot 8.314 \text{ J} \cdot \text{mol}^{-1} \text{K}^{-1} = -2.05 \text{ J} \cdot \text{mol}^{-1} \text{K}^{-1}$$

$$\Delta(\Delta S_r^\theta) = \pm 0.10 \text{ K} \cdot 8.314 \text{ J} \cdot \text{mol}^{-1} \text{K}^{-1} = \pm 0.83 \text{ J} \cdot \text{mol}^{-1} \text{K}^{-1}$$

$$\Delta G_r(20 \text{ }^\circ\text{C}) = -626 \text{ J} \cdot \text{mol}^{-1} - 293 \text{ K} \cdot -2.05 \text{ J} \cdot \text{mol}^{-1} \text{K}^{-1} = -0.03 \text{ KJ} \cdot \text{mol}^{-1}$$

$$\Delta(\Delta G_r(20 \text{ }^\circ\text{C})) = \pm(196 \text{ J} \cdot \text{mol}^{-1} - 293 \text{ K} \cdot 0.92 \text{ J} \cdot \text{mol}^{-1} \text{K}^{-1}) = \pm 0.05 \text{ KJ} \cdot \text{mol}^{-1}$$



#### 4. Crystallographic data

**Table S2.** Selected crystal structure data of the structure determinations of compounds 1, 2 and 3

| Compound                                      | 1                                                                   | 2                                                                   | 3                                                                   |
|-----------------------------------------------|---------------------------------------------------------------------|---------------------------------------------------------------------|---------------------------------------------------------------------|
| Empirical formula                             | C <sub>14</sub> H <sub>16</sub> Bi <sub>1</sub> N <sub>1</sub>      | C <sub>20</sub> H <sub>28</sub> Bi <sub>1</sub> N <sub>1</sub>      | C <sub>22</sub> H <sub>32</sub> Bi <sub>1</sub> N <sub>1</sub>      |
| Formula weight                                | 407.26                                                              | 491.41                                                              | 519.46                                                              |
| Crystal color, habit                          | colorless, needle                                                   | yellow, needle                                                      | colorless, block                                                    |
| Temperature/K                                 | 100.0                                                               | 100.0                                                               | 100.0                                                               |
| Crystal system                                | triclinic                                                           | monoclinic                                                          | triclinic                                                           |
| Space group                                   | <i>P</i> $\bar{1}$                                                  | <i>P</i> 2 <sub>1</sub> / <i>c</i>                                  | <i>P</i> $\bar{1}$                                                  |
| <i>a</i> /Å                                   | 9.3621(3)                                                           | 8.075(3)                                                            | 9.5236(5)                                                           |
| <i>b</i> /Å                                   | 9.725(3)                                                            | 8.710(3)                                                            | 9.9232(5)                                                           |
| <i>c</i> /Å                                   | 14.8523(6)                                                          | 26.474(12)                                                          | 13.0242(6)                                                          |
| $\alpha$ /°                                   | 80.019(3)                                                           | 90                                                                  | 96.380(4)                                                           |
| $\beta$ /°                                    | 78.242(3)                                                           | 93.97(4)                                                            | 104.891(4)                                                          |
| $\gamma$ /°                                   | 88.274(3)                                                           | 90                                                                  | 115.291(4)                                                          |
| Volume/Å <sup>3</sup>                         | 1307.51(9)                                                          | 1857.7(13)                                                          | 1040.56(10)                                                         |
| Z                                             | 4                                                                   | 4                                                                   | 2                                                                   |
| $\rho_{\text{calc}}$ /cm <sup>3</sup>         | 2.069                                                               | 1.757                                                               | 1.658                                                               |
| $\mu$ /mm <sup>-1</sup>                       | 13.458                                                              | 9.488                                                               | 8.475                                                               |
| F(000)                                        | 760.0                                                               | 952.0                                                               | 508.0                                                               |
| Crystal size/mm <sup>3</sup>                  | -                                                                   | -                                                                   | -                                                                   |
| Crystal radius(equiv)/mm                      | 0.0569                                                              | 0.0669                                                              | 0.0701                                                              |
| Diffractometer                                | Stoe IPDS 2T                                                        | Stoe IPDS 2                                                         | Stoe IPDS 2                                                         |
| Radiation                                     | MoK $\alpha$ ( $\lambda$ =<br>0.71073)                              | MoK $\alpha$ ( $\lambda$ =<br>0.71073)                              | MoK $\alpha$ ( $\lambda$ =<br>0.71073)                              |
| 2 $\theta$ range for data<br>collection/°     | 4.240 to 58.358                                                     | 3.084 to 58.342                                                     | 3.344 to 58.302                                                     |
| Reflections collected                         | 15578                                                               | 22828                                                               | 16312                                                               |
| Independent reflections                       | 7042 [R <sub>int</sub> =<br>0.0220, R <sub>sigma</sub> =<br>0.0269] | 4997 [R <sub>int</sub> =<br>0.0357, R <sub>sigma</sub> =<br>0.0317] | 5617 [R <sub>int</sub> =<br>0.0236, R <sub>sigma</sub> =<br>0.0291] |
| Data/restraint/parameters                     | 7042/0/293                                                          | 4997/0/207                                                          | 5617/1/230                                                          |
| Goodness-of-fit on <i>F</i> <sup>2</sup>      | 1.029                                                               | 0.971                                                               | 1.004                                                               |
| Final R indexes [all data]                    | R1 = 0.0407, wR2<br>= 0.0639                                        | R1 = 0.0389, wR2<br>= 0.0665                                        | R1 = 0.0312, wR2<br>= 0.0568                                        |
| Final R indexes [ $\geq 2\sigma(I)$ ]         | R1 = 0.0270, wR2<br>= 0.0591                                        | R1 = 0.0268, wR2<br>= 0.0640                                        | R1 = 0.0245, wR2<br>= 0.0554                                        |
| Largest diff. peak/hole/ e<br>Å <sup>-3</sup> | 1.83/-1.55                                                          | 1.99/-0.81                                                          | 1.29/-0.83                                                          |
| CCDC                                          | 2151498                                                             | 2151502                                                             | 2151499                                                             |

**Table S3.** Selected crystal structure data of the structure determinations of compounds **4**, **5** and **6**.

| Compound                                      | <b>4</b>                                                            | <b>5</b>                                                             | <b>6</b>                                                                       |
|-----------------------------------------------|---------------------------------------------------------------------|----------------------------------------------------------------------|--------------------------------------------------------------------------------|
| Empirical formula                             | C <sub>20</sub> H <sub>28</sub> Bi <sub>1</sub> P <sub>1</sub>      | C <sub>26</sub> H <sub>40</sub> Bi <sub>1</sub> P <sub>1</sub>       | C <sub>19</sub> H <sub>28</sub> Bi <sub>1</sub> P <sub>1</sub> Si <sub>1</sub> |
| Formula weight                                | 508.37                                                              | 592.53                                                               | 524.45                                                                         |
| Crystal color, habit                          | colorless, block                                                    | yellow, needle                                                       | colorless, needle                                                              |
| Temperature/K                                 | 100.0                                                               | 100.0                                                                | 100.0                                                                          |
| Crystal system                                | monoclinic                                                          | monoclinic                                                           | triclinic                                                                      |
| Space group                                   | <i>P2<sub>1</sub>/n</i>                                             | <i>P2<sub>1</sub>/c</i>                                              | <i>P<math>\bar{1}</math></i>                                                   |
| a/Å                                           | 6.3994(3)                                                           | 17.2923(13)                                                          | 6.2419(3)                                                                      |
| b/Å                                           | 18.2817(10)                                                         | 9.4485(5)                                                            | 8.9902(4)                                                                      |
| c/Å                                           | 16.9616(9)                                                          | 31.273(2)                                                            | 19.3583(10)                                                                    |
| $\alpha$ /°                                   | 90                                                                  | 90                                                                   | 77.940(4)                                                                      |
| $\beta$ /°                                    | 95.753(4)                                                           | 96.938(6)                                                            | 88.394(4)                                                                      |
| $\gamma$ /°                                   | 90                                                                  | 90                                                                   | 75.687(4)                                                                      |
| Volume/Å <sup>3</sup>                         | 1974.38(18)                                                         | 5072.1(6)                                                            | 1029.04(9)                                                                     |
| Z                                             | 4                                                                   | 8                                                                    | 2                                                                              |
| $\rho_{\text{calc}}$ /cm <sup>3</sup>         | 1.710                                                               | 1.552                                                                | 1.693                                                                          |
| $\mu$ /mm <sup>-1</sup>                       | 9.007                                                               | 7.024                                                                | 8.699                                                                          |
| F(000)                                        | 984.0                                                               | 2352.0                                                               | 508.0                                                                          |
| Crystal size/mm <sup>3</sup>                  | -                                                                   | -                                                                    | 0.0853                                                                         |
| Crystal radius(equiv)/mm                      | 0.0705                                                              | 0.0492                                                               |                                                                                |
| Diffractometer                                | Stoe IPDS 2T                                                        | Stoe IPDS 2T                                                         | Stoe IPDS 2                                                                    |
| Radiation                                     | MoK $\alpha$ ( $\lambda$ =<br>0.71073)                              | MoK $\alpha$ ( $\lambda$ =<br>0.71073)                               | MoK $\alpha$ ( $\lambda$ =<br>0.71073)                                         |
| 2 $\theta$ range for data<br>collection/°     | 4.456 to 57.00                                                      | 3.318 to 55.828                                                      | 4.304 to 52.00                                                                 |
| Reflections collected                         | 24622                                                               | 33120                                                                | 15780                                                                          |
| Independent reflections                       | 5012 [R <sub>int</sub> =<br>0.0277, R <sub>sigma</sub> =<br>0.0158] | 12063 [R <sub>int</sub> =<br>0.0309, R <sub>sigma</sub> =<br>0.0370] | 4036 [R <sub>int</sub> =<br>0.0246, R <sub>sigma</sub> =<br>0.0264]            |
| Data/restraint/parameters                     | 5012/0/205                                                          | 12063/0/529                                                          | 4036/0/205                                                                     |
| Goodness-of-fit on $F^2$                      | 1.047                                                               | 1.012                                                                | 1.011                                                                          |
| Final R indexes [all data]                    | R <sub>1</sub> = 0.0284, wR <sub>2</sub><br>= 0.0475                | R <sub>1</sub> = 0.0521, wR <sub>2</sub><br>= 0.0695                 | R <sub>1</sub> = 0.0267, wR <sub>2</sub><br>= 0.0523                           |
| Final R indexes [ $I \geq 2\sigma(I)$ ]       | R <sub>1</sub> = 0.0214, wR <sub>2</sub><br>= 0.0475                | R <sub>1</sub> = 0.0300, wR <sub>2</sub><br>= 0.0630                 | R <sub>1</sub> = 0.0215, wR <sub>2</sub><br>= 0.0523                           |
| Largest diff. peak/hole/ e<br>Å <sup>-3</sup> | 0.95/-0.75                                                          | 1.65/-1.13                                                           | 3.17/-0.37                                                                     |
| CCDC                                          | 2151505                                                             | 2151506                                                              | 2151500                                                                        |

**Table S4.** Selected crystal structure data of the structure determinations of compounds **7**, **8** and **9**

| Compound                                               | <b>7</b>                                                                       | <b>8</b>                                                            | <b>9</b>                                                            |
|--------------------------------------------------------|--------------------------------------------------------------------------------|---------------------------------------------------------------------|---------------------------------------------------------------------|
| Empirical formula                                      | C <sub>25</sub> H <sub>40</sub> Bi <sub>1</sub> P <sub>1</sub> Si <sub>1</sub> | C <sub>20</sub> H <sub>28</sub> Bi <sub>1</sub> As <sub>1</sub>     | C <sub>26</sub> H <sub>40</sub> Bi <sub>1</sub> As <sub>1</sub>     |
| Formula weight                                         | 608.61                                                                         | 552.32                                                              | 638.48                                                              |
| Crystal color, habit                                   | yellow, block                                                                  | colorless, needle                                                   | yellow, block                                                       |
| Temperature/K                                          | 100.0                                                                          | 100.0                                                               | 100.0                                                               |
| Crystal system                                         | monoclinic                                                                     | monoclinic                                                          | monoclinic                                                          |
| Space group                                            | <i>P2<sub>1</sub>/c</i>                                                        | <i>P2<sub>1</sub>/n</i>                                             | <i>P2<sub>1</sub>/n</i>                                             |
| <i>a</i> /Å                                            | 10.1342(10)                                                                    | 6.3753(3)                                                           | 10.010(2)                                                           |
| <i>b</i> /Å                                            | 8.4111(10)                                                                     | 18.4967(9)                                                          | 8.3035(19)                                                          |
| <i>c</i> /Å                                            | 31.257(3)                                                                      | 17.0593(7)                                                          | 30.855(6)                                                           |
| $\alpha$ /°                                            | 90                                                                             | 90                                                                  | 90                                                                  |
| $\beta$ /°                                             | 98.857(8)                                                                      | 95.766(3)                                                           | 97.675(16)                                                          |
| $\gamma$ /°                                            | 90                                                                             | 90                                                                  | 90                                                                  |
| Volume/Å <sup>3</sup>                                  | 2632.6(5)                                                                      | 2001.49(16)                                                         | 2541.7(9)                                                           |
| Z                                                      | 4                                                                              | 4                                                                   | 4                                                                   |
| $\rho_{\text{calc}}$ /cm <sup>3</sup>                  | 1.536                                                                          | 1.833                                                               | 1.663                                                               |
| $\mu$ /mm <sup>-1</sup>                                | 6.812                                                                          | 10.446                                                              | 8.238                                                               |
| F(000)                                                 | 1208.0                                                                         | 1056.0                                                              | 1248.0                                                              |
| Crystal radius(equiv)/mm                               | 0.1573                                                                         | -                                                                   | -                                                                   |
|                                                        |                                                                                | 0.0293                                                              | 0.0696                                                              |
| Diffractometer                                         | Stoe IPDS 2T                                                                   | Stoe IPDS 2                                                         | Stoe IPDS 2                                                         |
| Radiation                                              | MoK $\alpha$ ( $\lambda$ =<br>0.71073)                                         | MoK $\alpha$ ( $\lambda$ =<br>0.71073)                              | MoK $\alpha$ ( $\lambda$ =<br>0.71073)                              |
| 2 $\theta$ range for data<br>collection/°              | 4.068 to 53.37                                                                 | 3.256 to 51.992                                                     | 2.664 to 51.998                                                     |
| Reflections collected                                  | 31860                                                                          | 12090                                                               | 23780                                                               |
| Independent reflections                                | 5563 [R <sub>int</sub> =<br>0.0265, R <sub>sigma</sub> =<br>0.0176]            | 3927 [R <sub>int</sub> =<br>0.0354, R <sub>sigma</sub> =<br>0.0412] | 4994 [R <sub>int</sub> =<br>0.0281, R <sub>sigma</sub> =<br>0.0182] |
| Data/restraint/parameter<br>s Goodness-of-fit on $F^2$ | 5563/14/323<br>0.993                                                           | 3927/0/205<br>0.999                                                 | 4994/0/265<br>1.071                                                 |
| Final R indexes [all data]                             | R <sub>1</sub> = 0.0265, wR <sub>2</sub><br>= 0.0499                           | R <sub>1</sub> = 0.0538, wR <sub>2</sub><br>= 0.0717                | R <sub>1</sub> = 0.0284, wR <sub>2</sub><br>= 0.0641                |
| Final R indexes [ $I \geq 2\sigma(I)$ ]                | R <sub>1</sub> = 0.0195, wR <sub>2</sub><br>= 0.0482                           | R <sub>1</sub> = 0.0325, wR <sub>2</sub><br>= 0.0671                | R <sub>1</sub> = 0.0238, wR <sub>2</sub><br>= 0.0629                |
| Largest diff. peak/hole/ e<br>Å <sup>-3</sup>          | 0.99/-0.28                                                                     | 1.47/-0.59                                                          | 1.79/-0.50                                                          |
| CCDC                                                   | 2151503                                                                        | 2151508                                                             | 2151502                                                             |

**Table S5.** Selected crystal structure data of the structure determinations of compounds **10**, **11** and **12**

| Compound                                      | <b>10</b>                                                                       | <b>11</b>                                                                       | <b>12</b>                                                           |
|-----------------------------------------------|---------------------------------------------------------------------------------|---------------------------------------------------------------------------------|---------------------------------------------------------------------|
| Empirical formula                             | C <sub>19</sub> H <sub>28</sub> Bi <sub>1</sub> As <sub>1</sub> Si <sub>1</sub> | C <sub>25</sub> H <sub>40</sub> Bi <sub>1</sub> As <sub>1</sub> Si <sub>1</sub> | C <sub>30</sub> H <sub>32</sub> Bi <sub>1</sub> Sb <sub>1</sub>     |
| Formula weight                                | 568.40                                                                          | 652.56                                                                          | 723.28                                                              |
| Crystal color, habit                          | colorless, needle                                                               | yellow, block                                                                   | yellow, block                                                       |
| Temperature/K                                 | 100.0                                                                           | 100.0                                                                           | 100.0                                                               |
| Crystal system                                | monoclinic                                                                      | monoclinic                                                                      | triclinic                                                           |
| Space group                                   | C2/c                                                                            | P2 <sub>1</sub> /c                                                              | P $\bar{1}$                                                         |
| a/Å                                           | 40.1899(18)                                                                     | 10.1538(3)                                                                      | 9.8036(4)                                                           |
| b/Å                                           | 6.1680(2)                                                                       | 8.4878(2)                                                                       | 11.5319(5)                                                          |
| c/Å                                           | 17.2741(7)                                                                      | 31.1727(10)                                                                     | 13.3134(5)                                                          |
| $\alpha$ /°                                   | 90                                                                              | 90                                                                              | 77.045(3)                                                           |
| $\beta$ /°                                    | 103.327(3)                                                                      | 98.745(2)                                                                       | 76.373(3)                                                           |
| $\gamma$ /°                                   | 90                                                                              | 90                                                                              | 65.976(3)                                                           |
| Volume/Å <sup>3</sup>                         | 4166.8(3)                                                                       | 2655.34(13)                                                                     | 1317.59(10)                                                         |
| Z                                             | 4                                                                               | 4                                                                               | 2                                                                   |
| $\rho_{\text{calc}}$ /g/cm <sup>3</sup>       | 1.812                                                                           | 1.632                                                                           | 1.823                                                               |
| $\mu$ /mm <sup>-1</sup>                       | 10.092                                                                          | 7.930                                                                           | 7.709                                                               |
| F(000)                                        | 2176.0                                                                          | 1280.0                                                                          | 692.0                                                               |
| Crystal size/mm <sup>3</sup>                  | -                                                                               | -                                                                               | -                                                                   |
| Crystal radius(equiv)/mm                      | 0.0972                                                                          | 0.1738                                                                          | 0.0453                                                              |
| Diffractometer                                | Stoe IPDS 2                                                                     | Stoe IPDS 2T                                                                    | Stoe IPDS 2T                                                        |
| Radiation                                     | MoK $\alpha$ ( $\lambda$ =<br>0.71073)                                          | MoK $\alpha$ ( $\lambda$ =<br>0.71073)                                          | MoK $\alpha$ ( $\lambda$ =<br>0.71073)                              |
| 2 $\theta$ range for data<br>collection/°     | 4.814 to 58.458                                                                 | 4.058 to 55.952                                                                 | 3.192 to 58.51                                                      |
| Reflections collected                         | 19382                                                                           | 15324                                                                           | 16609                                                               |
| Independent reflections                       | 5619 [R <sub>int</sub> =<br>0.0321, R <sub>sigma</sub> =<br>0.0249]             | 6248 [R <sub>int</sub> =<br>0.0280, R <sub>sigma</sub> =<br>0.0300]             | 7091 [R <sub>int</sub> =<br>0.0268, R <sub>sigma</sub> =<br>0.0367] |
| Data/restraint/parameters                     | 5619/0/205                                                                      | 6248/25/304                                                                     | 7091/0/295                                                          |
| Goodness-of-fit on $F^2$                      | 1.056                                                                           | 1.049                                                                           | 1.026                                                               |
| Final R indexes [all data]                    | R <sub>1</sub> = 0.0402, wR <sub>2</sub><br>= 0.0796                            | R <sub>1</sub> = 0.0371, wR <sub>2</sub><br>= 0.0668                            | R <sub>1</sub> = 0.0456, wR <sub>2</sub><br>= 0.0762                |
| Final R indexes [ $I \geq 2\sigma(I)$ ]       | R <sub>1</sub> = 0.0301, wR <sub>2</sub><br>= 0.0733                            | R <sub>1</sub> = 0.0282, wR <sub>2</sub><br>= 0.0641                            | R <sub>1</sub> = 0.0318, wR <sub>2</sub><br>= 0.0719                |
| Largest diff. peak/hole/ e<br>Å <sup>-3</sup> | 1.95/-2.14                                                                      | 1.02/-0.58                                                                      | 1.64/-1.68                                                          |
| CCDC                                          | 2151504                                                                         | 2151509                                                                         | 2151507                                                             |
